# Supplementary material for: Construction and use of an adaptive optics two-photon microscope with direct wavefront sensing
Source: Springer Nature journal article supplement (doi:10.1038/s41596-023-00893-w), 2023-11-01

|                                                                                                                                                                                                                                                                                                                                                                                                                                                                                                                                                              |      |           |      |   |  |  |  |                      |      |           |      |                                                 |  |                                 |  |                     |  |  |  |  |  |  |  |       |  |  |  |  |  |  |  |        |  |  |  |  |  |  |  |     |  |  |  |  |  |  |  |     |  |  |  |  |  |  |  |                      |  |  |  |                    |  |  |  |               |  |
|--------------------------------------------------------------------------------------------------------------------------------------------------------------------------------------------------------------------------------------------------------------------------------------------------------------------------------------------------------------------------------------------------------------------------------------------------------------------------------------------------------------------------------------------------------------|------|-----------|------|---|--|--|--|----------------------|------|-----------|------|-------------------------------------------------|--|---------------------------------|--|---------------------|--|--|--|--|--|--|--|-------|--|--|--|--|--|--|--|--------|--|--|--|--|--|--|--|-----|--|--|--|--|--|--|--|-----|--|--|--|--|--|--|--|----------------------|--|--|--|--------------------|--|--|--|---------------|--|
| 4                                                                                                                                                                                                                                                                                                                                                                                                                                                                                                                                                            |      |           |      | 3 |  |  |  | 2                    |      |           |      | 1                                               |  |                                 |  |                     |  |  |  |  |  |  |  |       |  |  |  |  |  |  |  |        |  |  |  |  |  |  |  |     |  |  |  |  |  |  |  |     |  |  |  |  |  |  |  |                      |  |  |  |                    |  |  |  |               |  |
| F                                                                                                                                                                                                                                                                                                                                                                                                                                                                                                                                                            |      |           |      |   |  |  |  |                      |      |           |      |                                                 |  |                                 |  |                     |  |  |  |  |  |  |  |       |  |  |  |  |  |  |  |        |  |  |  |  |  |  |  |     |  |  |  |  |  |  |  |     |  |  |  |  |  |  |  |                      |  |  |  |                    |  |  |  |               |  |
| E                                                                                                                                                                                                                                                                                                                                                                                                                                                                                                                                                            |      |           |      |   |  |  |  |                      |      |           |      |                                                 |  |                                 |  |                     |  |  |  |  |  |  |  |       |  |  |  |  |  |  |  |        |  |  |  |  |  |  |  |     |  |  |  |  |  |  |  |     |  |  |  |  |  |  |  |                      |  |  |  |                    |  |  |  |               |  |
| D                                                                                                                                                                                                                                                                                                                                                                                                                                                                                                                                                            |      |           |      |   |  |  |  |                      |      |           |      |                                                 |  |                                 |  |                     |  |  |  |  |  |  |  |       |  |  |  |  |  |  |  |        |  |  |  |  |  |  |  |     |  |  |  |  |  |  |  |     |  |  |  |  |  |  |  |                      |  |  |  |                    |  |  |  |               |  |
| C                                                                                                                                                                                                                                                                                                                                                                                                                                                                                                                                                            |      |           |      |   |  |  |  |                      |      |           |      |                                                 |  |                                 |  |                     |  |  |  |  |  |  |  |       |  |  |  |  |  |  |  |        |  |  |  |  |  |  |  |     |  |  |  |  |  |  |  |     |  |  |  |  |  |  |  |                      |  |  |  |                    |  |  |  |               |  |
| B                                                                                                                                                                                                                                                                                                                                                                                                                                                                                                                                                            |      |           |      |   |  |  |  |                      |      |           |      |                                                 |  |                                 |  |                     |  |  |  |  |  |  |  |       |  |  |  |  |  |  |  |        |  |  |  |  |  |  |  |     |  |  |  |  |  |  |  |     |  |  |  |  |  |  |  |                      |  |  |  |                    |  |  |  |               |  |
| A                                                                                                                                                                                                                                                                                                                                                                                                                                                                                                                                                            |      |           |      |   |  |  |  |                      |      |           |      |                                                 |  |                                 |  |                     |  |  |  |  |  |  |  |       |  |  |  |  |  |  |  |        |  |  |  |  |  |  |  |     |  |  |  |  |  |  |  |     |  |  |  |  |  |  |  |                      |  |  |  |                    |  |  |  |               |  |
| <div>UNLESS OTHERWISE SPECIFIED:<br/>DIMENSIONS ARE IN MILLIMETERS<br/>SURFACE FINISH:<br/>TOLERANCES:<br/>LINEAR:<br/>ANGULAR:</div>                                                                                                                                                                                                                                                                                                                                                                                                                        |      |           |      |   |  |  |  | <div>FINISH:</div>   |      |           |      | <div>DEBURR AND<br/>BREAK SHARP<br/>EDGES</div> |  | <div>DO NOT SCALE DRAWING</div> |  | <div>REVISION</div> |  |  |  |  |  |  |  |       |  |  |  |  |  |  |  |        |  |  |  |  |  |  |  |     |  |  |  |  |  |  |  |     |  |  |  |  |  |  |  |                      |  |  |  |                    |  |  |  |               |  |
| <table><tr><td></td><td>NAME</td><td>SIGNATURE</td><td>DATE</td><td></td><td></td><td></td><td></td></tr><tr><td>DRAWN</td><td></td><td></td><td></td><td></td><td></td><td></td><td></td></tr><tr><td>CHK'D</td><td></td><td></td><td></td><td></td><td></td><td></td><td></td></tr><tr><td>APPV'D</td><td></td><td></td><td></td><td></td><td></td><td></td><td></td></tr><tr><td>MFG</td><td></td><td></td><td></td><td></td><td></td><td></td><td></td></tr><tr><td>Q.A</td><td></td><td></td><td></td><td></td><td></td><td></td><td></td></tr></table> |      |           |      |   |  |  |  |                      | NAME | SIGNATURE | DATE |                                                 |  |                                 |  | DRAWN               |  |  |  |  |  |  |  | CHK'D |  |  |  |  |  |  |  | APPV'D |  |  |  |  |  |  |  | MFG |  |  |  |  |  |  |  | Q.A |  |  |  |  |  |  |  | <div>MATERIAL:</div> |  |  |  | <div>DWG NO.</div> |  |  |  | <div>A4</div> |  |
|                                                                                                                                                                                                                                                                                                                                                                                                                                                                                                                                                              | NAME | SIGNATURE | DATE |   |  |  |  |                      |      |           |      |                                                 |  |                                 |  |                     |  |  |  |  |  |  |  |       |  |  |  |  |  |  |  |        |  |  |  |  |  |  |  |     |  |  |  |  |  |  |  |     |  |  |  |  |  |  |  |                      |  |  |  |                    |  |  |  |               |  |
| DRAWN                                                                                                                                                                                                                                                                                                                                                                                                                                                                                                                                                        |      |           |      |   |  |  |  |                      |      |           |      |                                                 |  |                                 |  |                     |  |  |  |  |  |  |  |       |  |  |  |  |  |  |  |        |  |  |  |  |  |  |  |     |  |  |  |  |  |  |  |     |  |  |  |  |  |  |  |                      |  |  |  |                    |  |  |  |               |  |
| CHK'D                                                                                                                                                                                                                                                                                                                                                                                                                                                                                                                                                        |      |           |      |   |  |  |  |                      |      |           |      |                                                 |  |                                 |  |                     |  |  |  |  |  |  |  |       |  |  |  |  |  |  |  |        |  |  |  |  |  |  |  |     |  |  |  |  |  |  |  |     |  |  |  |  |  |  |  |                      |  |  |  |                    |  |  |  |               |  |
| APPV'D                                                                                                                                                                                                                                                                                                                                                                                                                                                                                                                                                       |      |           |      |   |  |  |  |                      |      |           |      |                                                 |  |                                 |  |                     |  |  |  |  |  |  |  |       |  |  |  |  |  |  |  |        |  |  |  |  |  |  |  |     |  |  |  |  |  |  |  |     |  |  |  |  |  |  |  |                      |  |  |  |                    |  |  |  |               |  |
| MFG                                                                                                                                                                                                                                                                                                                                                                                                                                                                                                                                                          |      |           |      |   |  |  |  |                      |      |           |      |                                                 |  |                                 |  |                     |  |  |  |  |  |  |  |       |  |  |  |  |  |  |  |        |  |  |  |  |  |  |  |     |  |  |  |  |  |  |  |     |  |  |  |  |  |  |  |                      |  |  |  |                    |  |  |  |               |  |
| Q.A                                                                                                                                                                                                                                                                                                                                                                                                                                                                                                                                                          |      |           |      |   |  |  |  |                      |      |           |      |                                                 |  |                                 |  |                     |  |  |  |  |  |  |  |       |  |  |  |  |  |  |  |        |  |  |  |  |  |  |  |     |  |  |  |  |  |  |  |     |  |  |  |  |  |  |  |                      |  |  |  |                    |  |  |  |               |  |
| <div>deformable mirror conjugation</div>                                                                                                                                                                                                                                                                                                                                                                                                                                                                                                                     |      |           |      |   |  |  |  | <div>SCALE:1:1</div> |      |           |      | <div>SHEET 1 OF 1</div>                         |  |                                 |  |                     |  |  |  |  |  |  |  |       |  |  |  |  |  |  |  |        |  |  |  |  |  |  |  |     |  |  |  |  |  |  |  |     |  |  |  |  |  |  |  |                      |  |  |  |                    |  |  |  |               |  |
| 4                                                                                                                                                                                                                                                                                                                                                                                                                                                                                                                                                            |      |           |      | 3 |  |  |  | 2                    |      |           |      | 1                                               |  |                                 |  |                     |  |  |  |  |  |  |  |       |  |  |  |  |  |  |  |        |  |  |  |  |  |  |  |     |  |  |  |  |  |  |  |     |  |  |  |  |  |  |  |                      |  |  |  |                    |  |  |  |               |  |

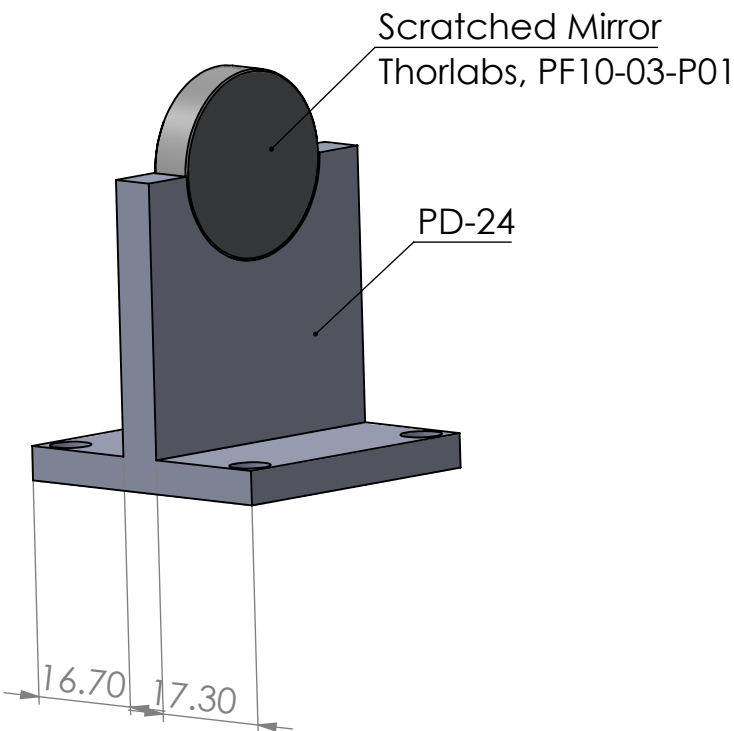

Supplement: MOESM1 [file 41596_2023_893_MOESM1_ESM.zip]
