# Supplementary material for: Construction and use of an adaptive optics two-photon microscope with direct wavefront sensing
Source: Springer Nature journal article supplement (doi:10.1038/s41596-023-00893-w), 2023-11-01
Supplement: MOESM1 [file 41596_2023_893_MOESM1_ESM.zip]

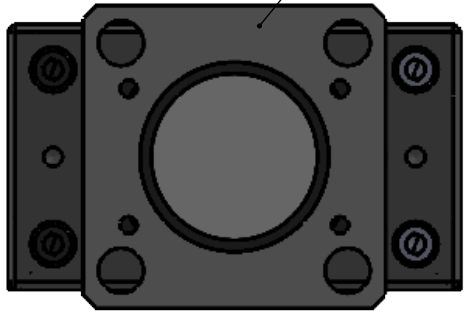

LINOS, G061010000, PD-13

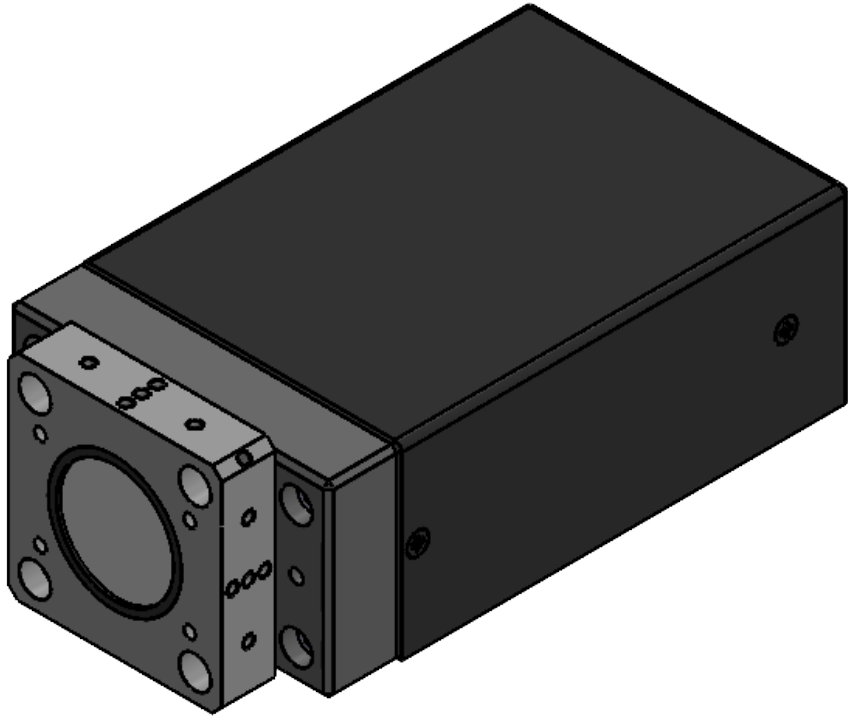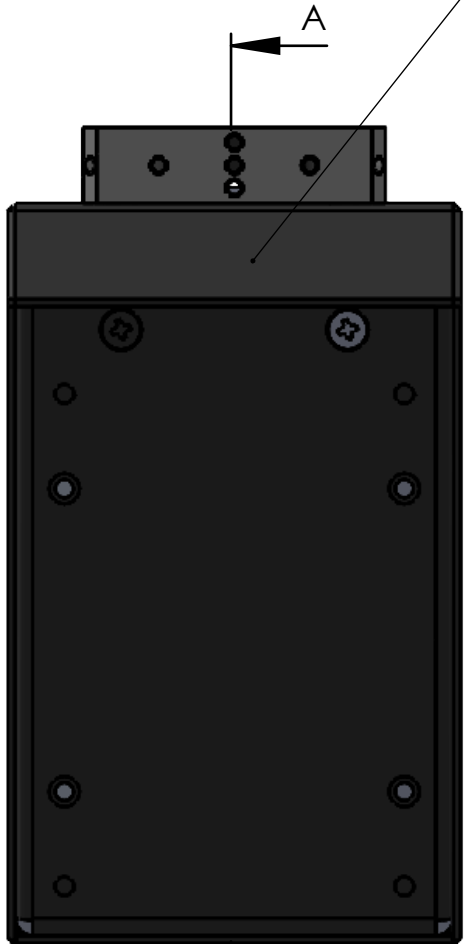

MPPC: Hamamatsu, C13366-3050GA, PD-12

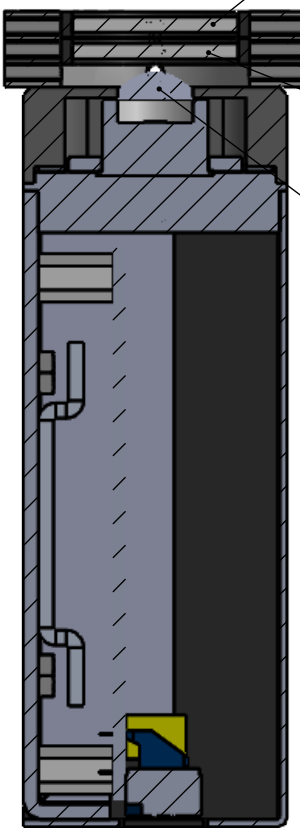

SECTION A-A

short pass filter: Semrock, FF01-790-SP-25

band pass filter:  
Semrock, FF01-530/55-25 (Green/Yellow Channel)  
Semrock, FF01-593/46-25 (Red Channel)  
Semrock, FF01-708/75-25 (far-red Channel)

Thorlabs, A240-A

|                                                                                                                       |      |  |           |  |      |         |  |                                    |  |                      |        |          |  |  |
|-----------------------------------------------------------------------------------------------------------------------|------|--|-----------|--|------|---------|--|------------------------------------|--|----------------------|--------|----------|--|--|
| UNLESS OTHERWISE SPECIFIED:<br>DIMENSIONS ARE IN MILLIMETERS<br>SURFACE FINISH:<br>TOLERANCES:<br>LINEAR:<br>ANGULAR: |      |  |           |  |      | FINISH: |  | DEBURR AND<br>BREAK SHARP<br>EDGES |  | DO NOT SCALE DRAWING |        | REVISION |  |  |
|                                                                                                                       |      |  |           |  |      |         |  |                                    |  |                      |        |          |  |  |
|                                                                                                                       | NAME |  | SIGNATURE |  | DATE |         |  |                                    |  |                      | TITLE: |          |  |  |
| DRAWN                                                                                                                 |      |  |           |  |      |         |  |                                    |  |                      |        |          |  |  |
| CHK'D                                                                                                                 |      |  |           |  |      |         |  |                                    |  |                      |        |          |  |  |
| APPV'D                                                                                                                |      |  |           |  |      |         |  |                                    |  |                      |        |          |  |  |
| MFG                                                                                                                   |      |  |           |  |      |         |  |                                    |  |                      |        |          |  |  |
| Q.A                                                                                                                   |      |  |           |  |      |         |  |                                    |  | DWG NO.              |        | A3       |  |  |
|                                                                                                                       |      |  |           |  |      |         |  |                                    |  | AD-20 MPPC Module    |        |          |  |  |
|                                                                                                                       |      |  |           |  |      |         |  |                                    |  |                      |        |          |  |  |
|                                                                                                                       |      |  |           |  |      |         |  |                                    |  |                      |        |          |  |  |
|                                                                                                                       |      |  |           |  |      |         |  |                                    |  |                      |        |          |  |  |
|                                                                                                                       |      |  |           |  |      |         |  |                                    |  |                      |        |          |  |  |
|                                                                                                                       |      |  |           |  |      |         |  |                                    |  |                      |        |          |  |  |
|                                                                                                                       |      |  |           |  |      |         |  |                                    |  |                      |        |          |  |  |
|                                                                                                                       |      |  |           |  |      |         |  |                                    |  |                      |        |          |  |  |
|                                                                                                                       |      |  |           |  |      |         |  |                                    |  |                      |        |          |  |  |
|                                                                                                                       |      |  |           |  |      |         |  |                                    |  |                      |        |          |  |  |
|                                                                                                                       |      |  |           |  |      |         |  |                                    |  |                      |        |          |  |  |
|                                                                                                                       |      |  |           |  |      |         |  |                                    |  |                      |        |          |  |  |
|                                                                                                                       |      |  |           |  |      |         |  |                                    |  |                      |        |          |  |  |
|                                                                                                                       |      |  |           |  |      |         |  |                                    |  |                      |        |          |  |  |
|                                                                                                                       |      |  |           |  |      |         |  |                                    |  |                      |        |          |  |  |
|                                                                                                                       |      |  |           |  |      |         |  |                                    |  |                      |        |          |  |  |
|                                                                                                                       |      |  |           |  |      |         |  |                                    |  |                      |        |          |  |  |
|                                                                                                                       |      |  |           |  |      |         |  |                                    |  |                      |        |          |  |  |
|                                                                                                                       |      |  |           |  |      |         |  |                                    |  |                      |        |          |  |  |
|                                                                                                                       |      |  |           |  |      |         |  |                                    |  |                      |        |          |  |  |
|                                                                                                                       |      |  |           |  |      |         |  |                                    |  |                      |        |          |  |  |
|                                                                                                                       |      |  |           |  |      |         |  |                                    |  |                      |        |          |  |  |
|                                                                                                                       |      |  |           |  |      |         |  |                                    |  |                      |        |          |  |  |
|                                                                                                                       |      |  |           |  |      |         |  |                                    |  |                      |        |          |  |  |
|                                                                                                                       |      |  |           |  |      |         |  |                                    |  |                      |        |          |  |  |
|                                                                                                                       |      |  |           |  |      |         |  |                                    |  |                      |        |          |  |  |
|                                                                                                                       |      |  |           |  |      |         |  |                                    |  |                      |        |          |  |  |
|                                                                                                                       |      |  |           |  |      |         |  |                                    |  |                      |        |          |  |  |
|                                                                                                                       |      |  |           |  |      |         |  |                                    |  |                      |        |          |  |  |
|                                                                                                                       |      |  |           |  |      |         |  |                                    |  |                      |        |          |  |  |
|                                                                                                                       |      |  |           |  |      |         |  |                                    |  |                      |        |          |  |  |
|                                                                                                                       |      |  |           |  |      |         |  |                                    |  |                      |        |          |  |  |
|                                                                                                                       |      |  |           |  |      |         |  |                                    |  |                      |        |          |  |  |
|                                                                                                                       |      |  |           |  |      |         |  |                                    |  |                      |        |          |  |  |
|                                                                                                                       |      |  |           |  |      |         |  |                                    |  |                      |        |          |  |  |
|                                                                                                                       |      |  |           |  |      |         |  |                                    |  |                      |        |          |  |  |
|                                                                                                                       |      |  |           |  |      |         |  |                                    |  |                      |        |          |  |  |
|                                                                                                                       |      |  |           |  |      |         |  |                                    |  |                      |        |          |  |  |
|                                                                                                                       |      |  |           |  |      |         |  |                                    |  |                      |        |          |  |  |
|                                                                                                                       |      |  |           |  |      |         |  |                                    |  |                      |        |          |  |  |
|                                                                                                                       |      |  |           |  |      |         |  |                                    |  |                      |        |          |  |  |
|                                                                                                                       |      |  |           |  |      |         |  |                                    |  |                      |        |          |  |  |
|                                                                                                                       |      |  |           |  |      |         |  |                                    |  |                      |        |          |  |  |
|                                                                                                                       |      |  |           |  |      |         |  |                                    |  |                      |        |          |  |  |
|                                                                                                                       |      |  |           |  |      |         |  |                                    |  |                      |        |          |  |  |
|                                                                                                                       |      |  |           |  |      |         |  |                                    |  |                      |        |          |  |  |
|                                                                                                                       |      |  |           |  |      |         |  |                                    |  |                      |        |          |  |  |
|                                                                                                                       |      |  |           |  |      |         |  |                                    |  |                      |        |          |  |  |
|                                                                                                                       |      |  |           |  |      |         |  |                                    |  |                      |        |          |  |  |
|                                                                                                                       |      |  |           |  |      |         |  |                                    |  |                      |        |          |  |  |
|                                                                                                                       |      |  |           |  |      |         |  |                                    |  |                      |        |          |  |  |
|                                                                                                                       |      |  |           |  |      |         |  |                                    |  |                      |        |          |  |  |
|                                                                                                                       |      |  |           |  |      |         |  |                                    |  |                      |        |          |  |  |
|                                                                                                                       |      |  |           |  |      |         |  |                                    |  |                      |        |          |  |  |
|                                                                                                                       |      |  |           |  |      |         |  |                                    |  |                      |        |          |  |  |
|                                                                                                                       |      |  |           |  |      |         |  |                                    |  |                      |        |          |  |  |
|                                                                                                                       |      |  |           |  |      |         |  |                                    |  |                      |        |          |  |  |
|                                                                                                                       |      |  |           |  |      |         |  |                                    |  |                      |        |          |  |  |
|                                                                                                                       |      |  |           |  |      |         |  |                                    |  |                      |        |          |  |  |
|                                                                                                                       |      |  |           |  |      |         |  |                                    |  |                      |        |          |  |  |
|                                                                                                                       |      |  |           |  |      |         |  |                                    |  |                      |        |          |  |  |
|                                                                                                                       |      |  |           |  |      |         |  |                                    |  |                      |        |          |  |  |
|                                                                                                                       |      |  |           |  |      |         |  |                                    |  |                      |        |          |  |  |
|                                                                                                                       |      |  |           |  |      |         |  |                                    |  |                      |        |          |  |  |
|                                                                                                                       |      |  |           |  |      |         |  |                                    |  |                      |        |          |  |  |
|                                                                                                                       |      |  |           |  |      |         |  |                                    |  |                      |        |          |  |  |
|                                                                                                                       |      |  |           |  |      |         |  |                                    |  |                      |        |          |  |  |
|                                                                                                                       |      |  |           |  |      |         |  |                                    |  |                      |        |          |  |  |
|                                                                                                                       |      |  |           |  |      |         |  |                                    |  |                      |        |          |  |  |
|                                                                                                                       |      |  |           |  |      |         |  |                                    |  |                      |        |          |  |  |
|                                                                                                                       |      |  |           |  |      |         |  |                                    |  |                      |        |          |  |  |
|                                                                                                                       |      |  |           |  |      |         |  |                                    |  |                      |        |          |  |  |
|                                                                                                                       |      |  |           |  |      |         |  |                                    |  |                      |        |          |  |  |
|                                                                                                                       |      |  |           |  |      |         |  |                                    |  |                      |        |          |  |  |
|                                                                                                                       |      |  |           |  |      |         |  |                                    |  |                      |        |          |  |  |
|                                                                                                                       |      |  |           |  |      |         |  |                                    |  |                      |        |          |  |  |
|                                                                                                                       |      |  |           |  |      |         |  |                                    |  |                      |        |          |  |  |
|                                                                                                                       |      |  |           |  |      |         |  |                                    |  |                      |        |          |  |  |
|                                                                                                                       |      |  |           |  |      |         |  |                                    |  |                      |        |          |  |  |
|                                                                                                                       |      |  |           |  |      |         |  |                                    |  |                      |        |          |  |  |
|                                                                                                                       |      |  |           |  |      |         |  |                                    |  |                      |        |          |  |  |
|                                                                                                                       |      |  |           |  |      |         |  |                                    |  |                      |        |          |  |  |
|                                                                                                                       |      |  |           |  |      |         |  |                                    |  |                      |        |          |  |  |
|                                                                                                                       |      |  |           |  |      |         |  |                                    |  |                      |        |          |  |  |
|                                                                                                                       |      |  |           |  |      |         |  |                                    |  |                      |        |          |  |  |
|                                                                                                                       |      |  |           |  |      |         |  |                                    |  |                      |        |          |  |  |
|                                                                                                                       |      |  |           |  |      |         |  |                                    |  |                      |        |          |  |  |
|                                                                                                                       |      |  |           |  |      |         |  |                                    |  |                      |        |          |  |  |
|                                                                                                                       |      |  |           |  |      |         |  |                                    |  |                      |        |          |  |  |
|                                                                                                                       |      |  |           |  |      |         |  |                                    |  |                      |        |          |  |  |
|                                                                                                                       |      |  |           |  |      |         |  |                                    |  |                      |        |          |  |  |
|                                                                                                                       |      |  |           |  |      |         |  |                                    |  |                      |        |          |  |  |
|                                                                                                                       |      |  |           |  |      |         |  |                                    |  |                      |        |          |  |  |
|                                                                                                                       |      |  |           |  |      |         |  |                                    |  |                      |        |          |  |  |
|                                                                                                                       |      |  |           |  |      |         |  |                                    |  |                      |        |          |  |  |
|                                                                                                                       |      |  |           |  |      |         |  |                                    |  |                      |        |          |  |  |
|                                                                                                                       |      |  |           |  |      |         |  |                                    |  |                      |        |          |  |  |
|                                                                                                                       |      |  |           |  |      |         |  | </                                 |  |                      |        |          |  |  |
