# Supplementary material for: Construction and use of an adaptive optics two-photon microscope with direct wavefront sensing
Source: Springer Nature journal article supplement (doi:10.1038/s41596-023-00893-w), 2023-11-01
Supplement: MOESM1 [file 41596_2023_893_MOESM1_ESM.zip]

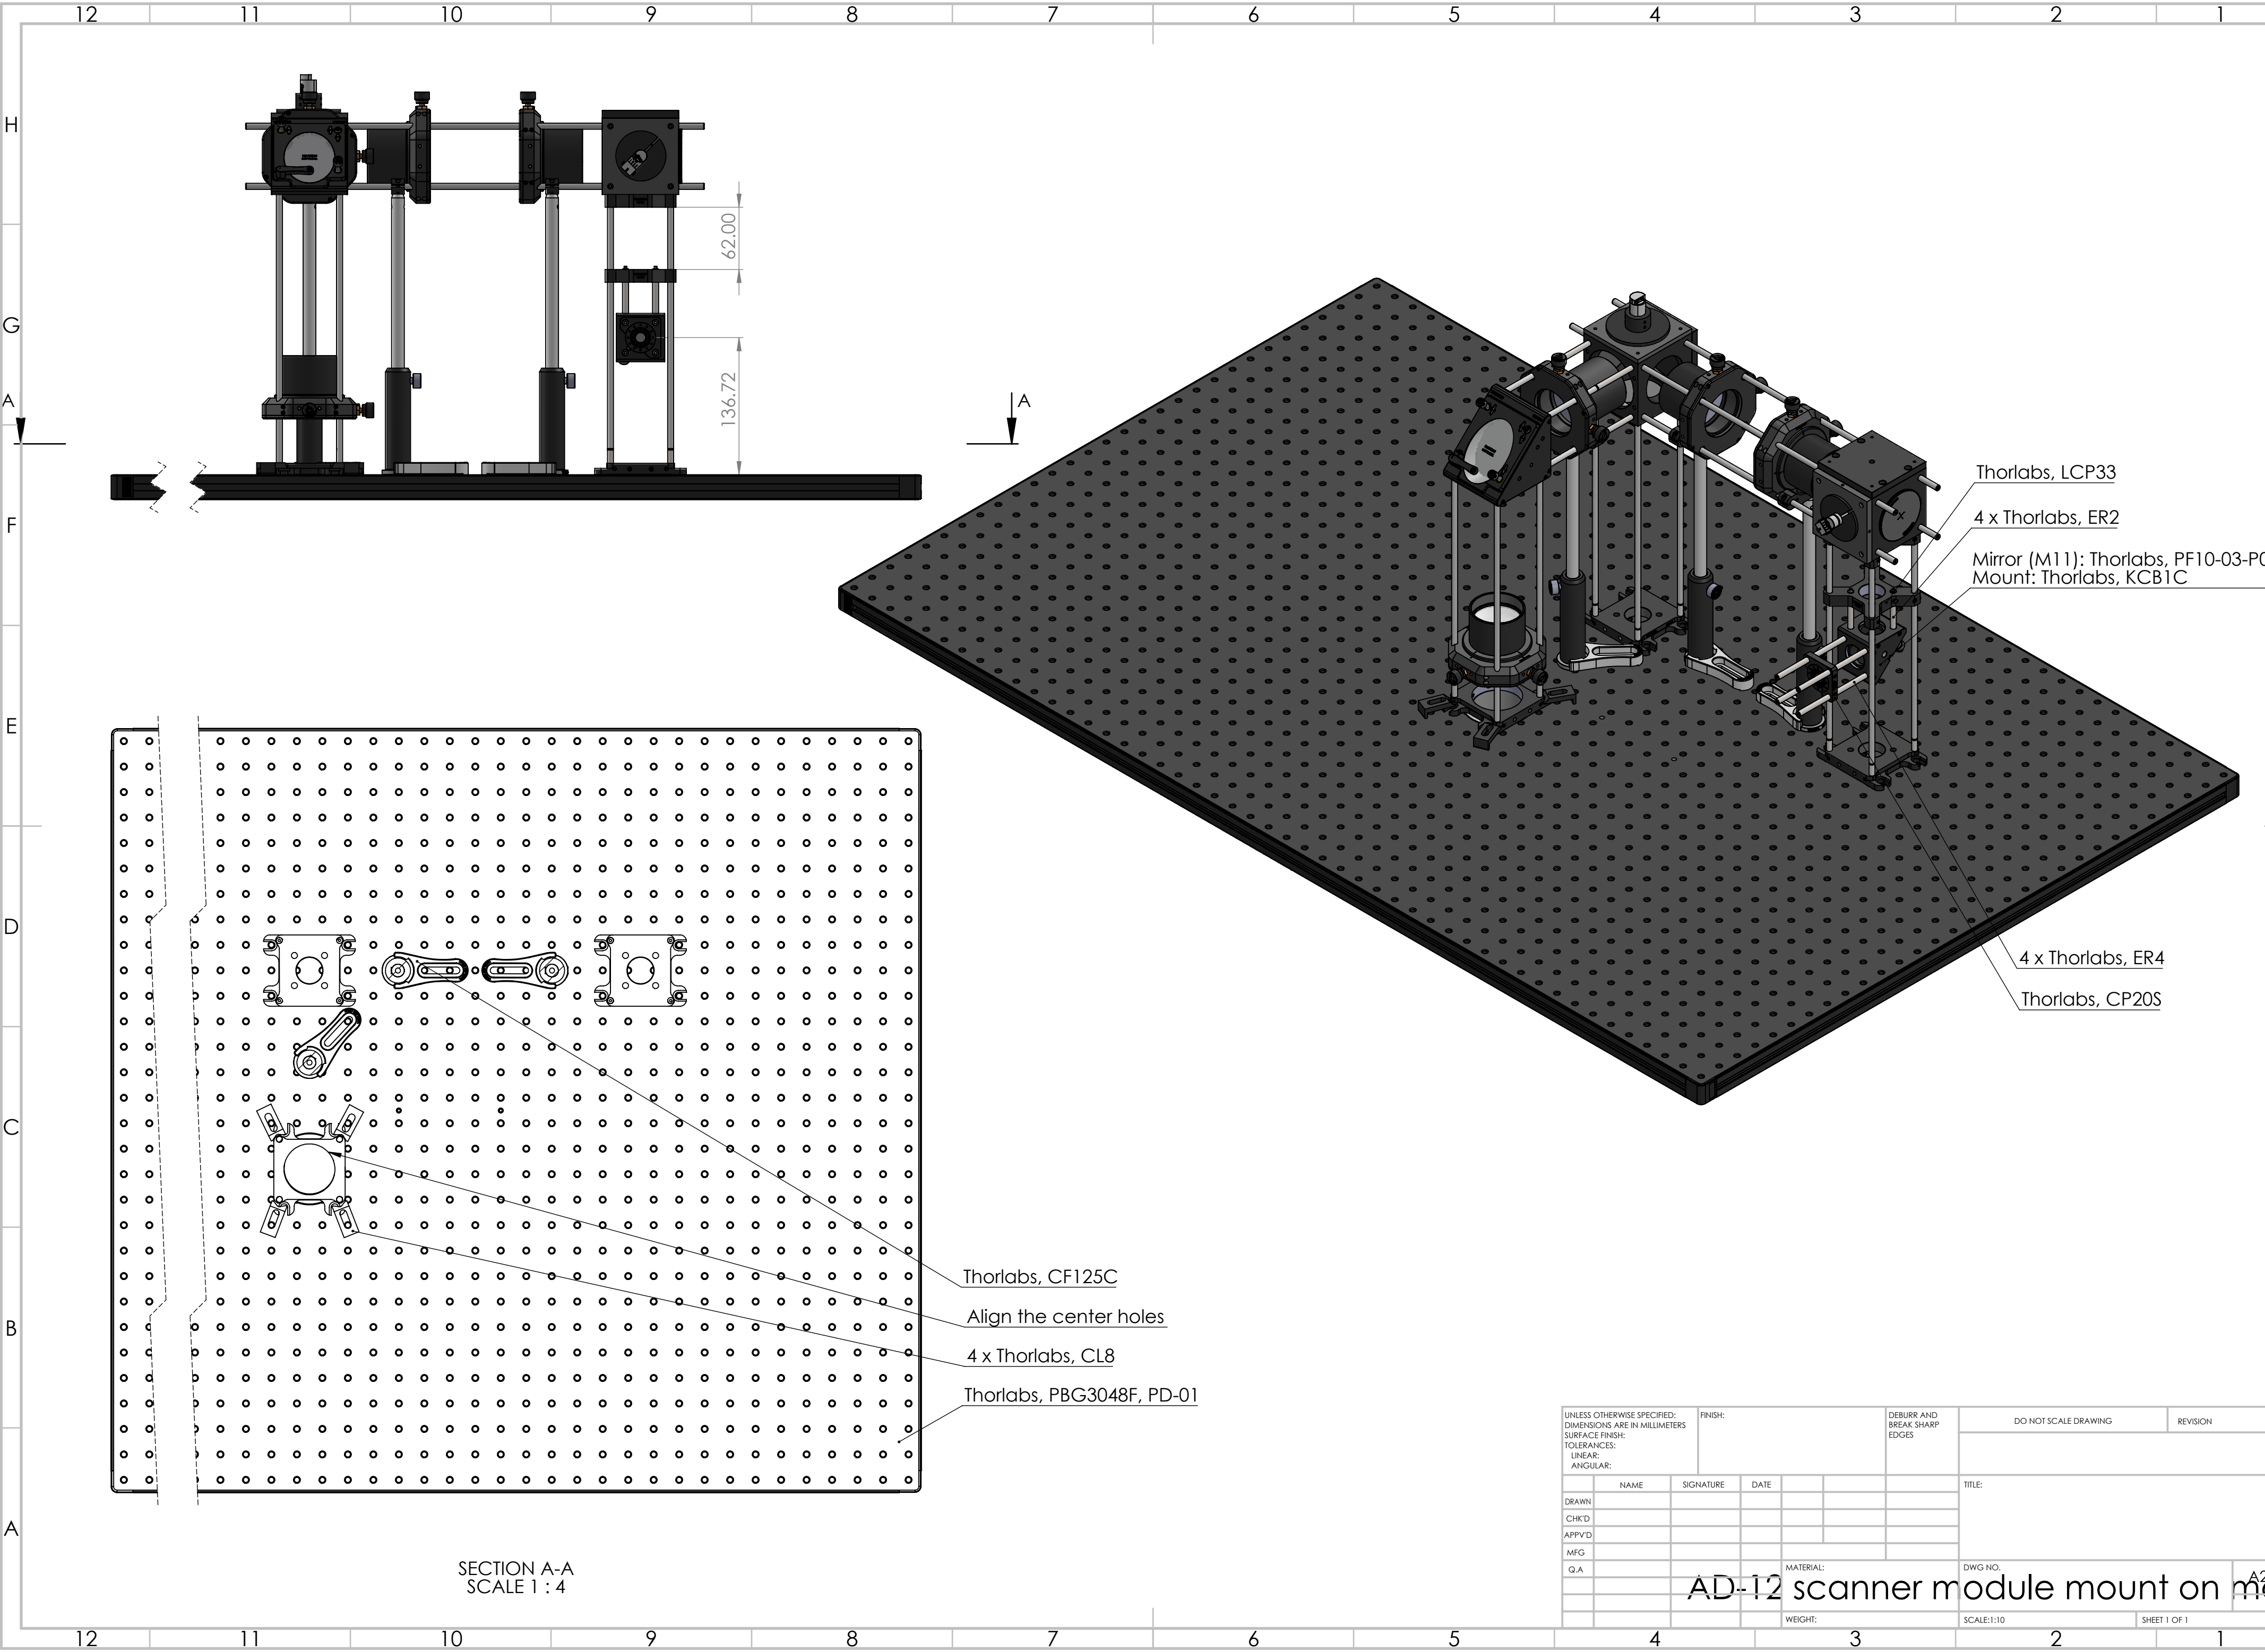

SECTION A-A  
SCALE 1 : 4

|                                                                                                                       |         |           |      |  |                                    |  |                      |  |          |
|-----------------------------------------------------------------------------------------------------------------------|---------|-----------|------|--|------------------------------------|--|----------------------|--|----------|
| UNLESS OTHERWISE SPECIFIED:<br>DIMENSIONS ARE IN MILLIMETERS<br>SURFACE FINISH:<br>TOLERANCES:<br>LINEAR:<br>ANGULAR: | FINISH: |           |      |  | DEBURR AND<br>BREAK SHARP<br>EDGES |  | DO NOT SCALE DRAWING |  | REVISION |
|                                                                                                                       |         |           |      |  |                                    |  | TITLE:               |  |          |
|                                                                                                                       |         |           |      |  |                                    |  | DWG NO.              |  |          |
|                                                                                                                       |         |           |      |  |                                    |  | SCALE:1:10           |  |          |
| DRAWN                                                                                                                 | NAME    | SIGNATURE | DATE |  |                                    |  | MATERIAL:            |  |          |
| CHK'D                                                                                                                 |         |           |      |  |                                    |  | WEIGHT:              |  |          |
| APPVD                                                                                                                 |         |           |      |  |                                    |  | SHEET 1 OF 1         |  |          |
| MFG                                                                                                                   |         |           |      |  |                                    |  |                      |  |          |
| Q.A                                                                                                                   |         |           |      |  |                                    |  |                      |  |          |
