# Supplementary material for: Construction and use of an adaptive optics two-photon microscope with direct wavefront sensing
Source: Springer Nature journal article supplement (doi:10.1038/s41596-023-00893-w), 2023-11-01
Supplement: MOESM1 [file 41596_2023_893_MOESM1_ESM.zip]

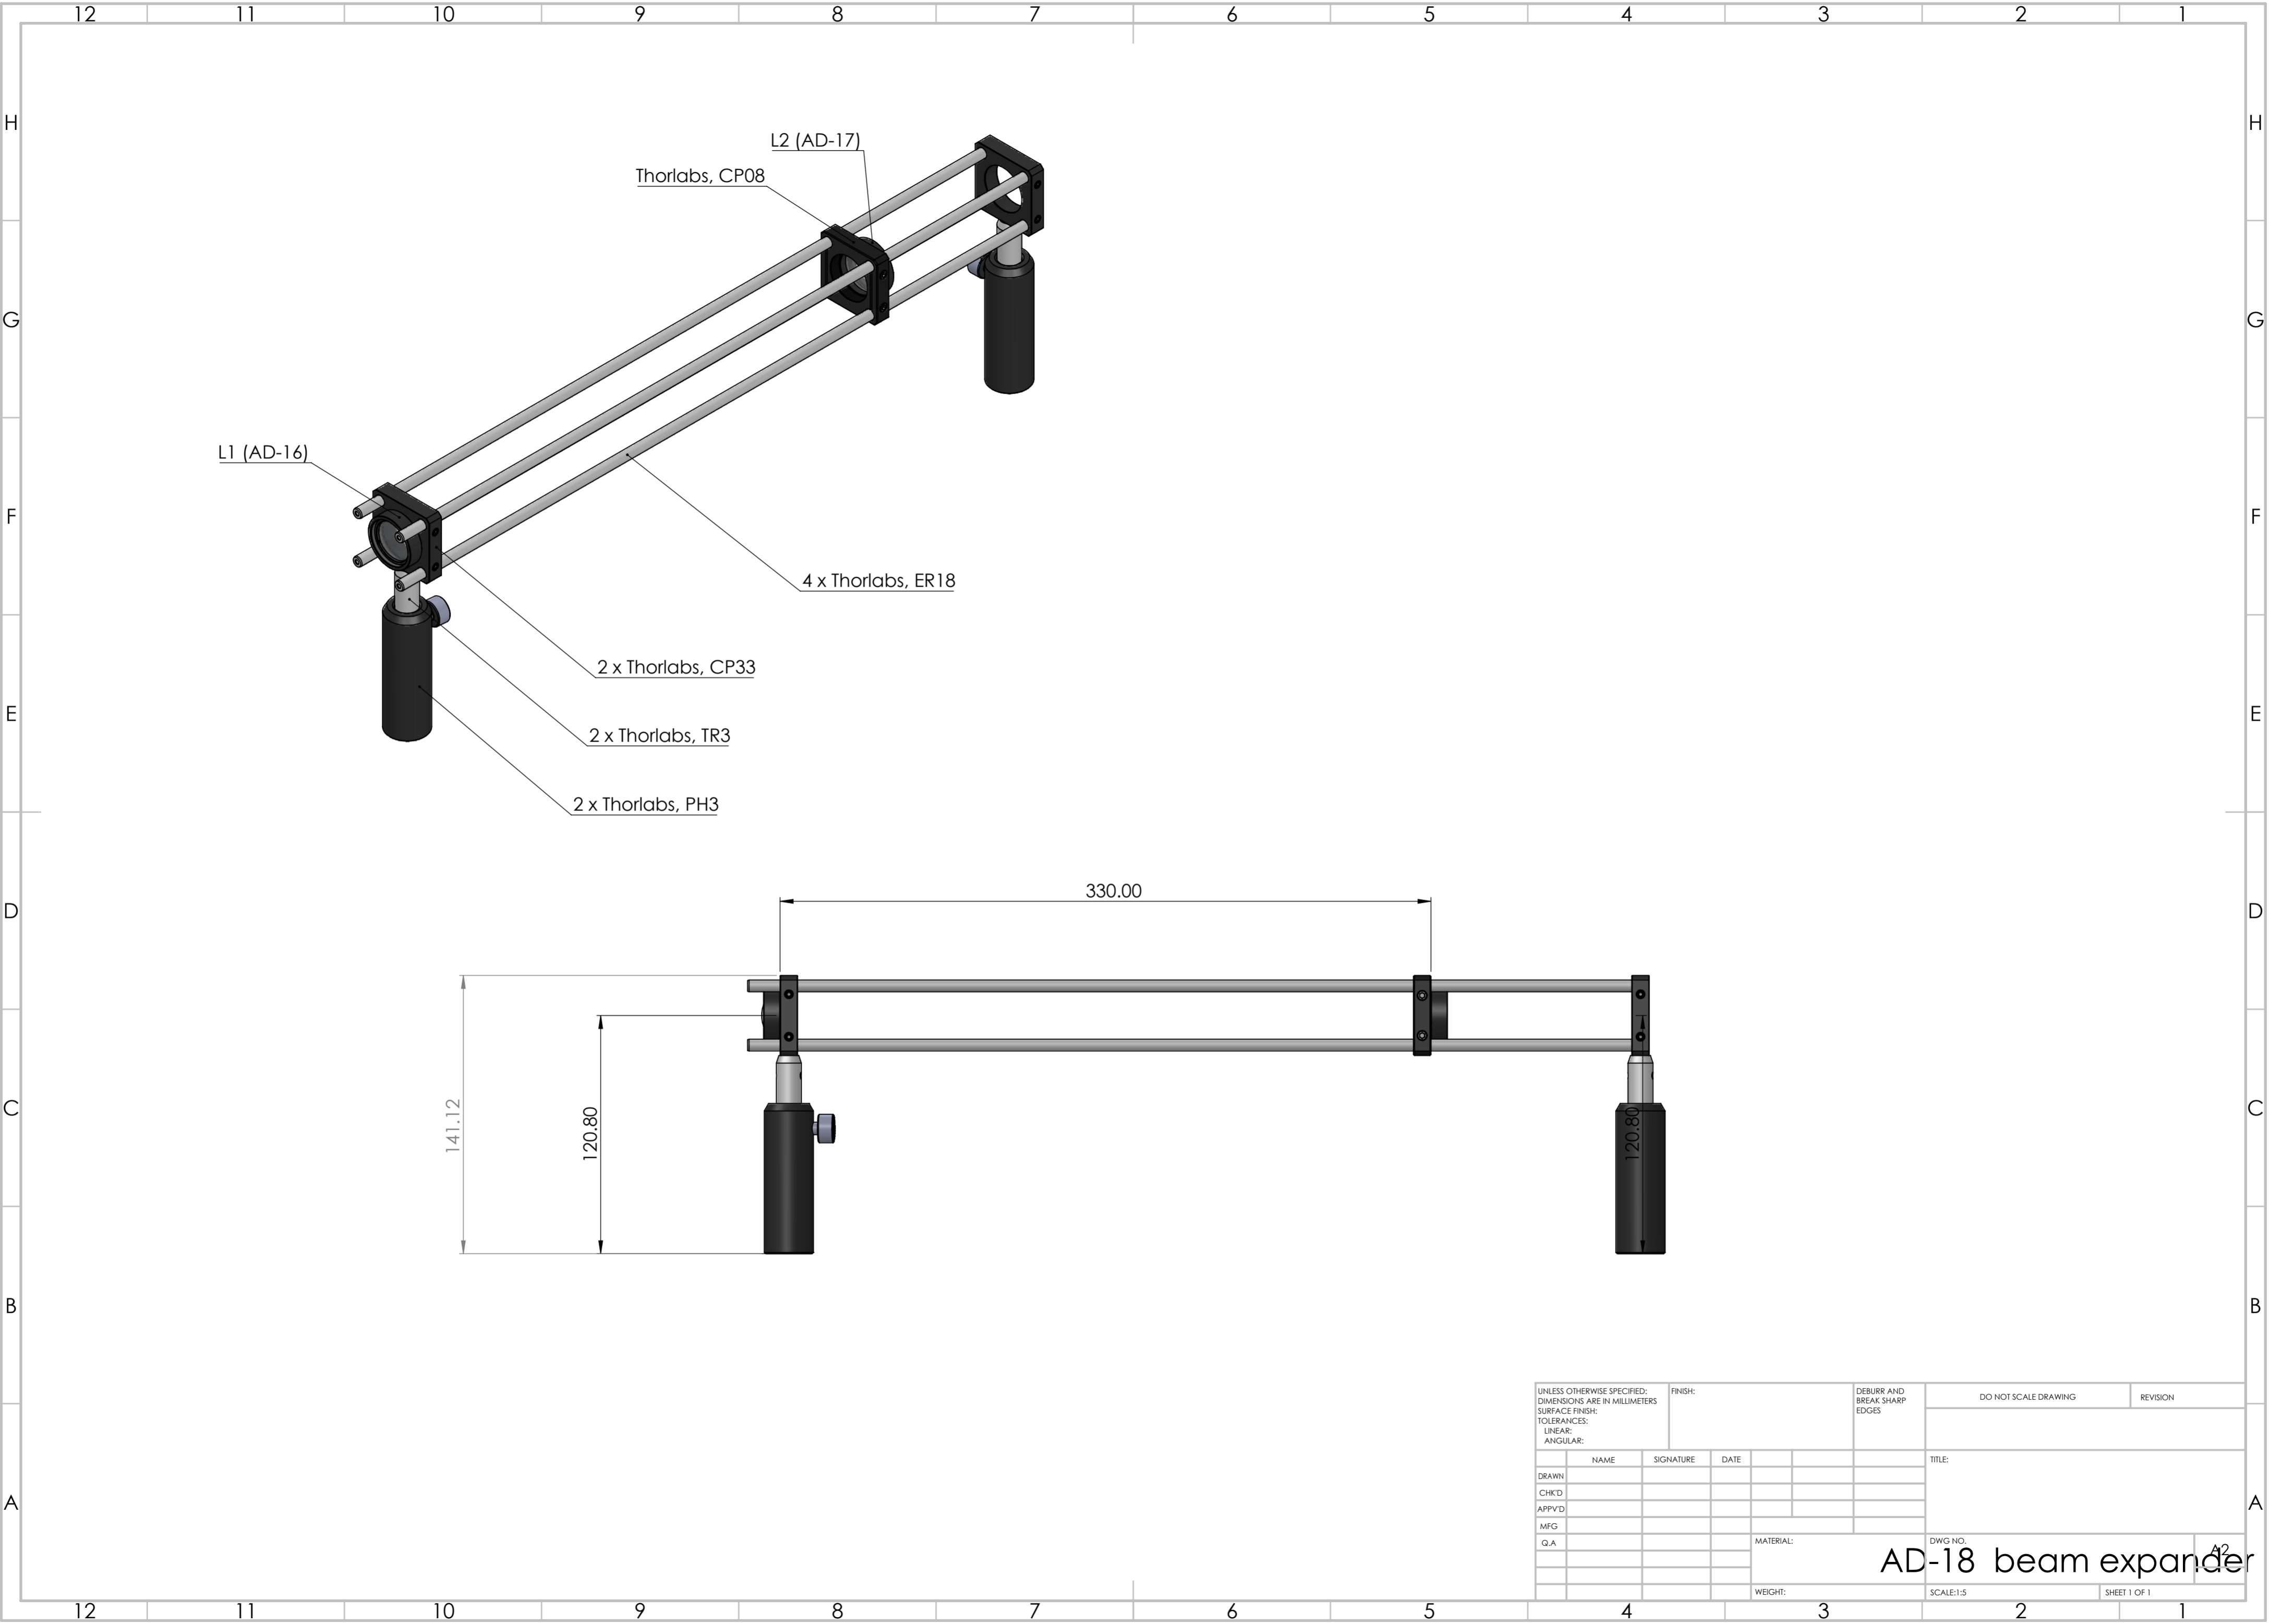

|                                                                                                                       |         |           |      |                                    |  |                      |  |              |
|-----------------------------------------------------------------------------------------------------------------------|---------|-----------|------|------------------------------------|--|----------------------|--|--------------|
| UNLESS OTHERWISE SPECIFIED:<br>DIMENSIONS ARE IN MILLIMETERS<br>SURFACE FINISH:<br>TOLERANCES:<br>LINEAR:<br>ANGULAR: | FINISH: |           |      | DEBURR AND<br>BREAK SHARP<br>EDGES |  | DO NOT SCALE DRAWING |  | REVISION     |
|                                                                                                                       |         |           |      |                                    |  |                      |  |              |
|                                                                                                                       | NAME    | SIGNATURE | DATE |                                    |  | TITLE:               |  |              |
| DRAWN                                                                                                                 |         |           |      |                                    |  |                      |  |              |
| CHK'D                                                                                                                 |         |           |      |                                    |  |                      |  |              |
| APP'VD                                                                                                                |         |           |      |                                    |  |                      |  |              |
| MFG                                                                                                                   |         |           |      |                                    |  |                      |  |              |
| Q.A                                                                                                                   |         |           |      |                                    |  | MATERIAL:            |  |              |
|                                                                                                                       |         |           |      |                                    |  |                      |  |              |
|                                                                                                                       |         |           |      |                                    |  | WEIGHT:              |  |              |
|                                                                                                                       |         |           |      |                                    |  | DWG NO:              |  |              |
|                                                                                                                       |         |           |      |                                    |  | SCALE:1:5            |  | SHEET 1 OF 1 |

AD-18 beam expander
