# Supplementary material for: Construction and use of an adaptive optics two-photon microscope with direct wavefront sensing
Source: Springer Nature journal article supplement (doi:10.1038/s41596-023-00893-w), 2023-11-01
Supplement: MOESM1 [file 41596_2023_893_MOESM1_ESM.zip]

|   |                                                                                                                       |   |           |   |                                    |                                 |          |
|---|-----------------------------------------------------------------------------------------------------------------------|---|-----------|---|------------------------------------|---------------------------------|----------|
|   | 4                                                                                                                     | 3 | 2         | 1 |                                    |                                 |          |
| F |                                                                                                                       |   |           |   |                                    | F                               |          |
| E |                                                                                                                       |   |           |   |                                    | E                               |          |
| D | <div>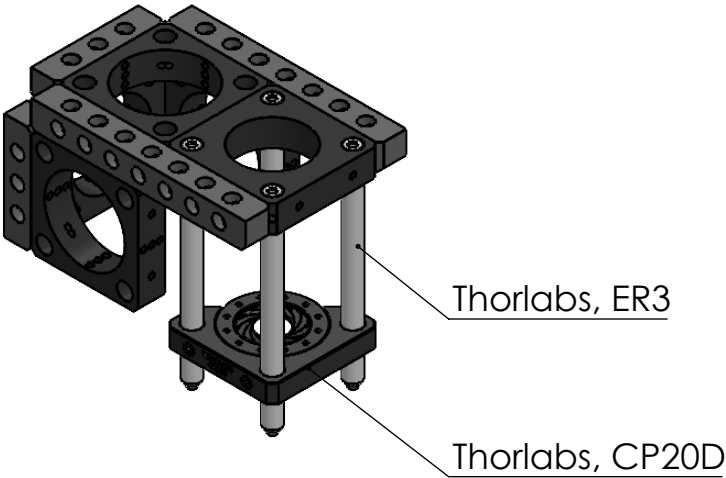</div>                         |   |           |   |                                    | D                               |          |
| C | <div></div>                       |   |           |   |                                    | C                               |          |
| B |                                                                                                                       |   |           |   |                                    | B                               |          |
| A | UNLESS OTHERWISE SPECIFIED:<br>DIMENSIONS ARE IN MILLIMETERS<br>SURFACE FINISH:<br>TOLERANCES:<br>LINEAR:<br>ANGULAR: |   | FINISH:   |   | DEBURR AND<br>BREAK SHARP<br>EDGES | DO NOT SCALE DRAWING            | REVISION |
|   | DRAWN                                                                                                                 |   | SIGNATURE |   | DATE                               | TITLE:                          |          |
|   | CHK'D                                                                                                                 |   |           |   |                                    |                                 |          |
|   | APPV'D                                                                                                                |   |           |   |                                    |                                 |          |
|   | MFG                                                                                                                   |   |           |   |                                    |                                 |          |
|   | Q.A                                                                                                                   |   |           |   |                                    |                                 |          |
|   |                                                                                                                       |   |           |   |                                    | DWG NO. <b>AD-39 pupil-iris</b> |          |
|   |                                                                                                                       |   |           |   |                                    |                                 |          |
|   |                                                                                                                       |   |           |   |                                    | A4                              |          |
|   |                                                                                                                       |   |           |   |                                    | SCALE:1:2                       |          |
|   |                                                                                                                       |   |           |   | SHEET 1 OF 1                       |                                 |          |
|   | 4                                                                                                                     | 3 | 2         | 1 |                                    |                                 |          |
