# Supplementary material for: Construction and use of an adaptive optics two-photon microscope with direct wavefront sensing
Source: Springer Nature journal article supplement (doi:10.1038/s41596-023-00893-w), 2023-11-01
Supplement: MOESM1 [file 41596_2023_893_MOESM1_ESM.zip]

4 3 2 1

F

F

E

E

D

D

C

C

B

B

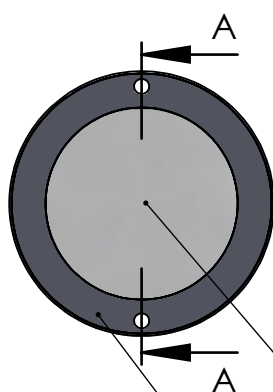

Thorlabs, LA1027-A

LINOS, G065078000, PD-18

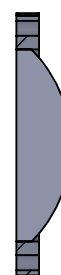

SECTION A-A

UNLESS OTHERWISE SPECIFIED:  
DIMENSIONS ARE IN MILLIMETERS  
SURFACE FINISH:  
TOLERANCES:  
LINEAR:  
ANGULAR:

FINISH:

DEBURR AND  
BREAK SHARP  
EDGES

DO NOT SCALE DRAWING

REVISION

|        | NAME | SIGNATURE | DATE |  |  |
|--------|------|-----------|------|--|--|
| DRAWN  |      |           |      |  |  |
| CHK'D  |      |           |      |  |  |
| APPV'D |      |           |      |  |  |
| MFG    |      |           |      |  |  |
| Q.A    |      |           |      |  |  |
|        |      |           |      |  |  |
|        |      |           |      |  |  |
|        |      |           |      |  |  |
|        |      |           |      |  |  |

|           |              |
|-----------|--------------|
| TITLE:    |              |
| DWG NO.   | AD-25 L12    |
| SCALE:1:1 | SHEET 1 OF 1 |

MATERIAL:

DWG NO.

AD-25 L12

A4

WEIGHT:

SCALE:1:1

SHEET 1 OF 1

4 3 2 1

A

A
