# Supplementary material for: Construction and use of an adaptive optics two-photon microscope with direct wavefront sensing
Source: Springer Nature journal article supplement (doi:10.1038/s41596-023-00893-w), 2023-11-01
Supplement: MOESM1 [file 41596_2023_893_MOESM1_ESM.zip]

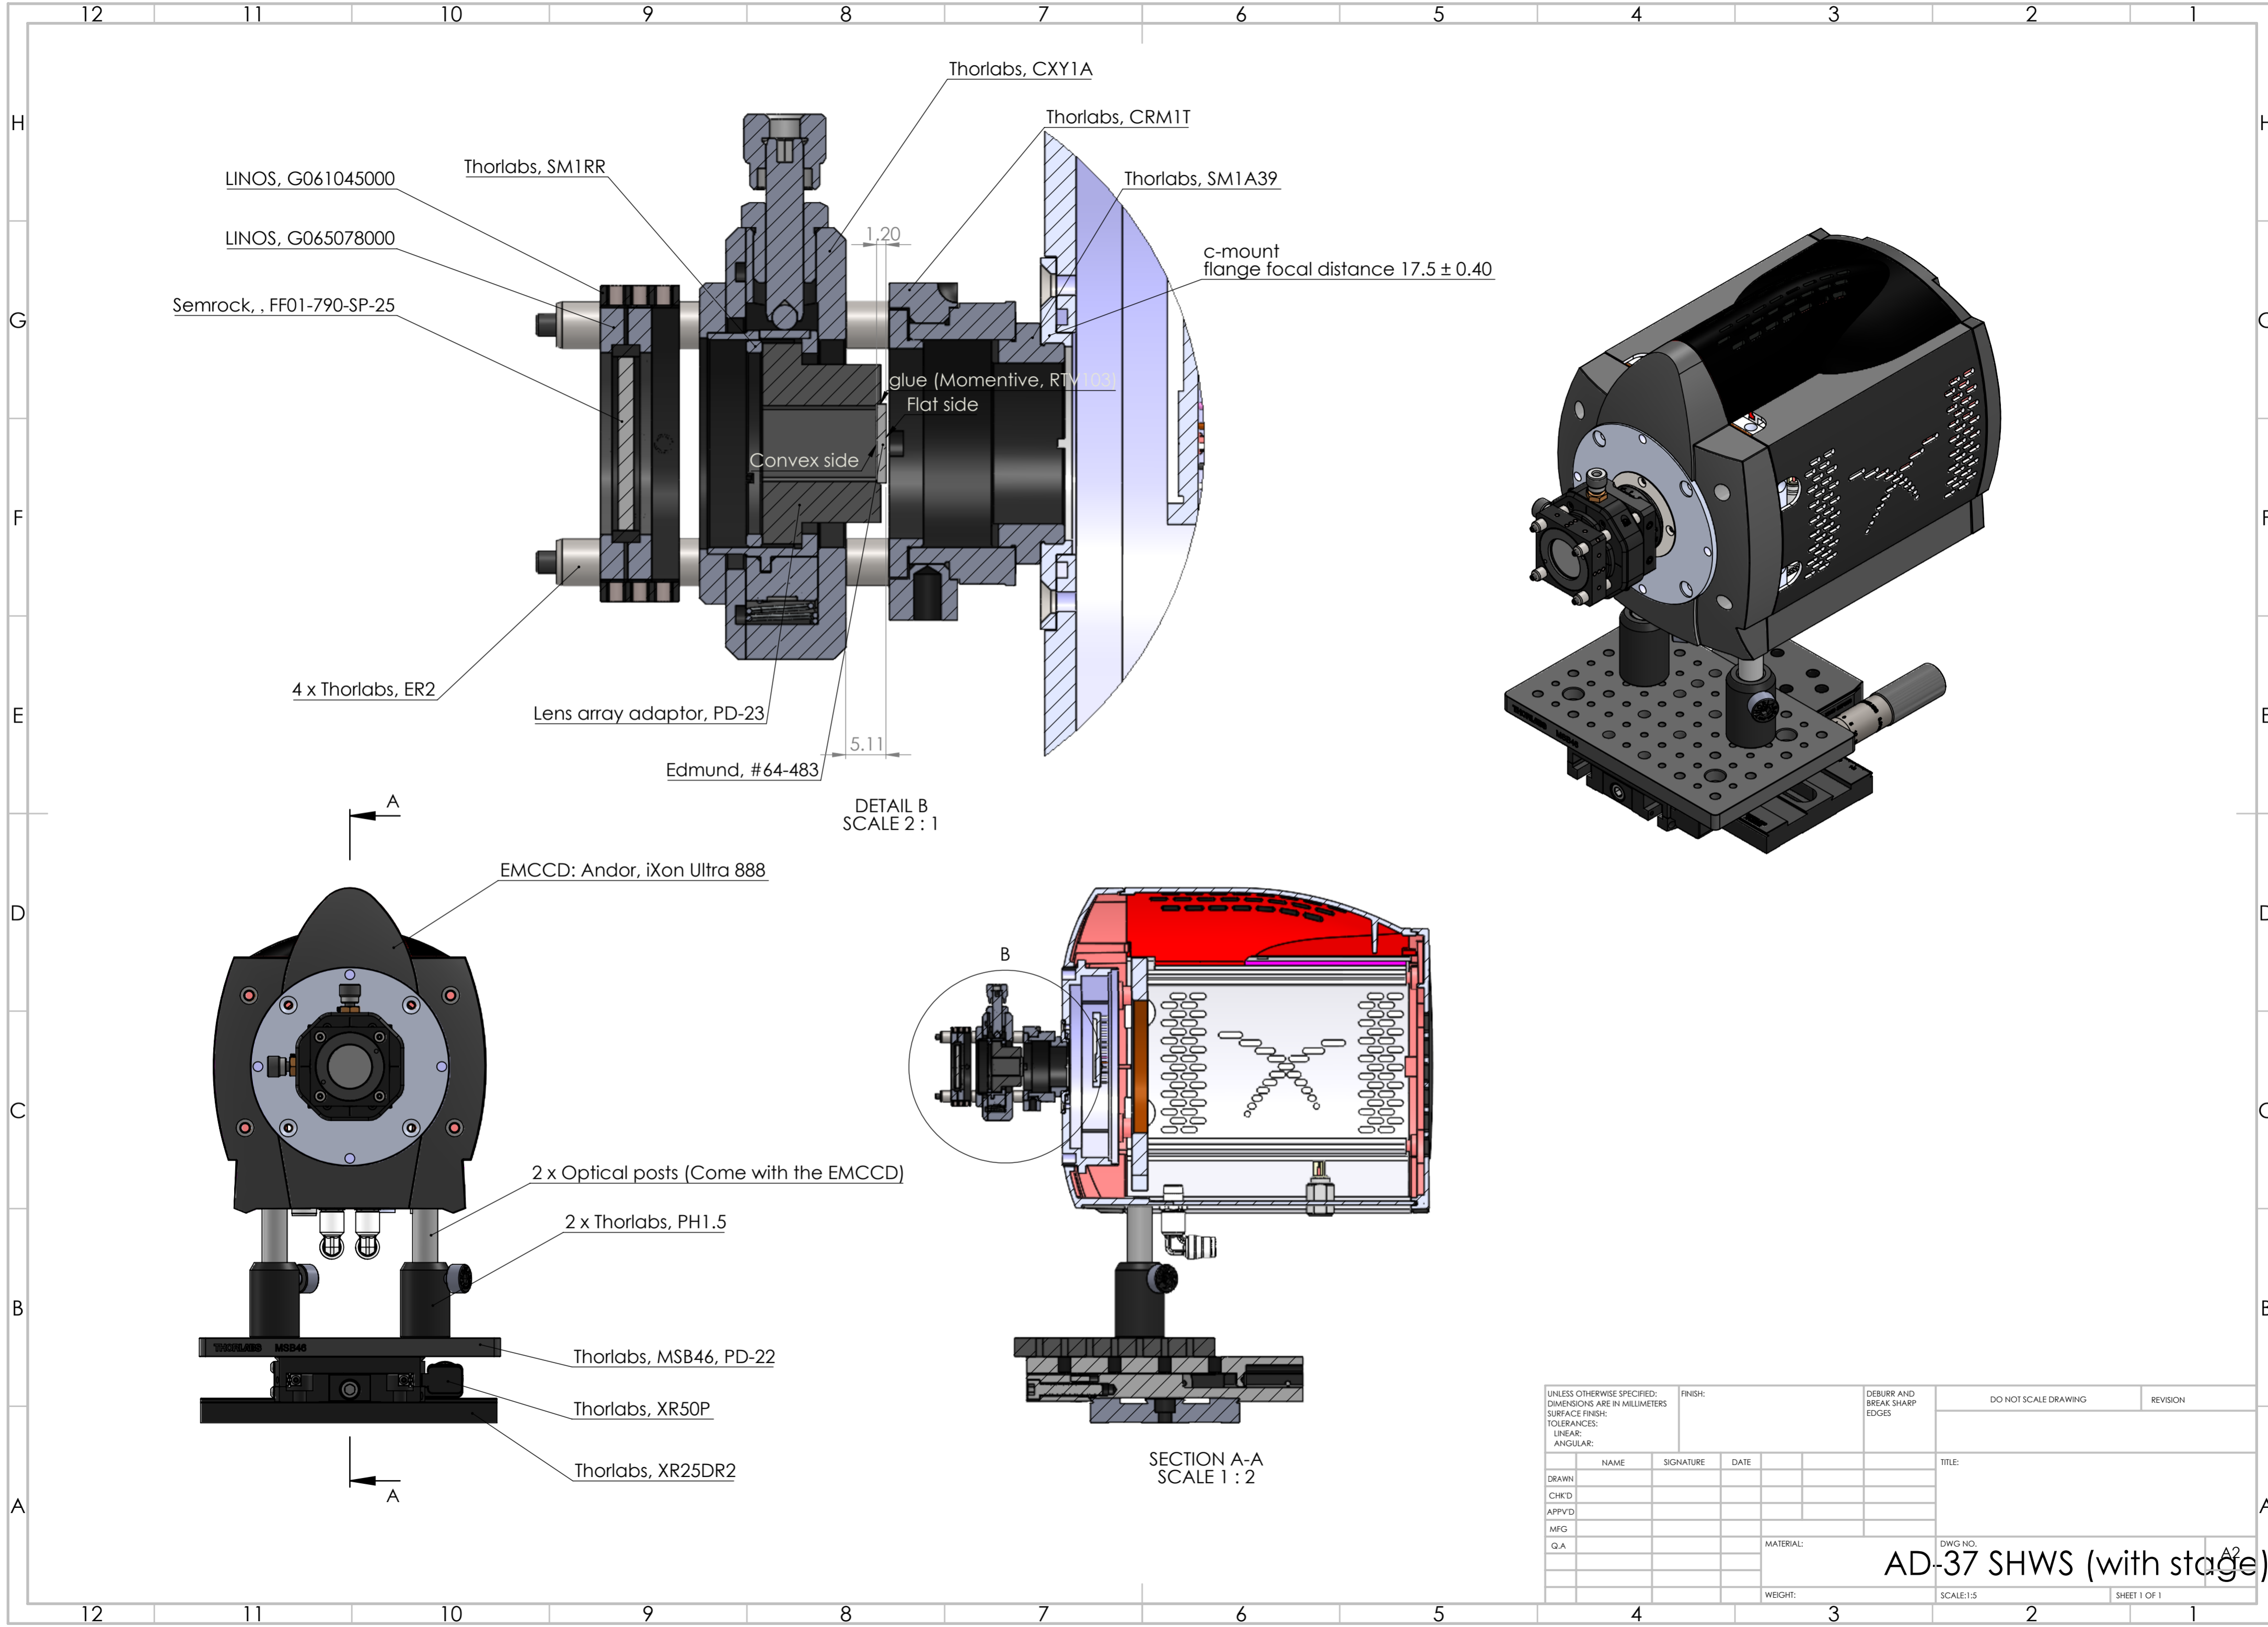

|                                                                                                                       |      |           |      |  |           |  |                                    |  |                      |        |          |
|-----------------------------------------------------------------------------------------------------------------------|------|-----------|------|--|-----------|--|------------------------------------|--|----------------------|--------|----------|
| UNLESS OTHERWISE SPECIFIED:<br>DIMENSIONS ARE IN MILLIMETERS<br>SURFACE FINISH:<br>TOLERANCES:<br>LINEAR:<br>ANGULAR: |      |           |      |  | FINISH:   |  | DEBURR AND<br>BREAK SHARP<br>EDGES |  | DO NOT SCALE DRAWING |        | REVISION |
|                                                                                                                       |      |           |      |  |           |  |                                    |  |                      |        |          |
|                                                                                                                       |      |           |      |  |           |  |                                    |  |                      | TITLE: |          |
| DRAWN                                                                                                                 | NAME | SIGNATURE | DATE |  |           |  |                                    |  |                      |        |          |
| CHK'D                                                                                                                 |      |           |      |  |           |  |                                    |  |                      |        |          |
| APPV'D                                                                                                                |      |           |      |  |           |  |                                    |  |                      |        |          |
| MFG                                                                                                                   |      |           |      |  |           |  |                                    |  |                      |        |          |
| Q.A                                                                                                                   |      |           |      |  |           |  |                                    |  |                      |        |          |
|                                                                                                                       |      |           |      |  | MATERIAL: |  | DWG. NO.                           |  | A2                   |        |          |
|                                                                                                                       |      |           |      |  |           |  |                                    |  |                      |        |          |
|                                                                                                                       |      |           |      |  |           |  |                                    |  |                      |        |          |
|                                                                                                                       |      |           |      |  | WEIGHT:   |  | SCALE:1:5                          |  | SHEET 1 OF 1         |        |          |
