# Supplementary material for: Construction and use of an adaptive optics two-photon microscope with direct wavefront sensing
Source: Springer Nature journal article supplement (doi:10.1038/s41596-023-00893-w), 2023-11-01
Supplement: MOESM1 [file 41596_2023_893_MOESM1_ESM.zip]

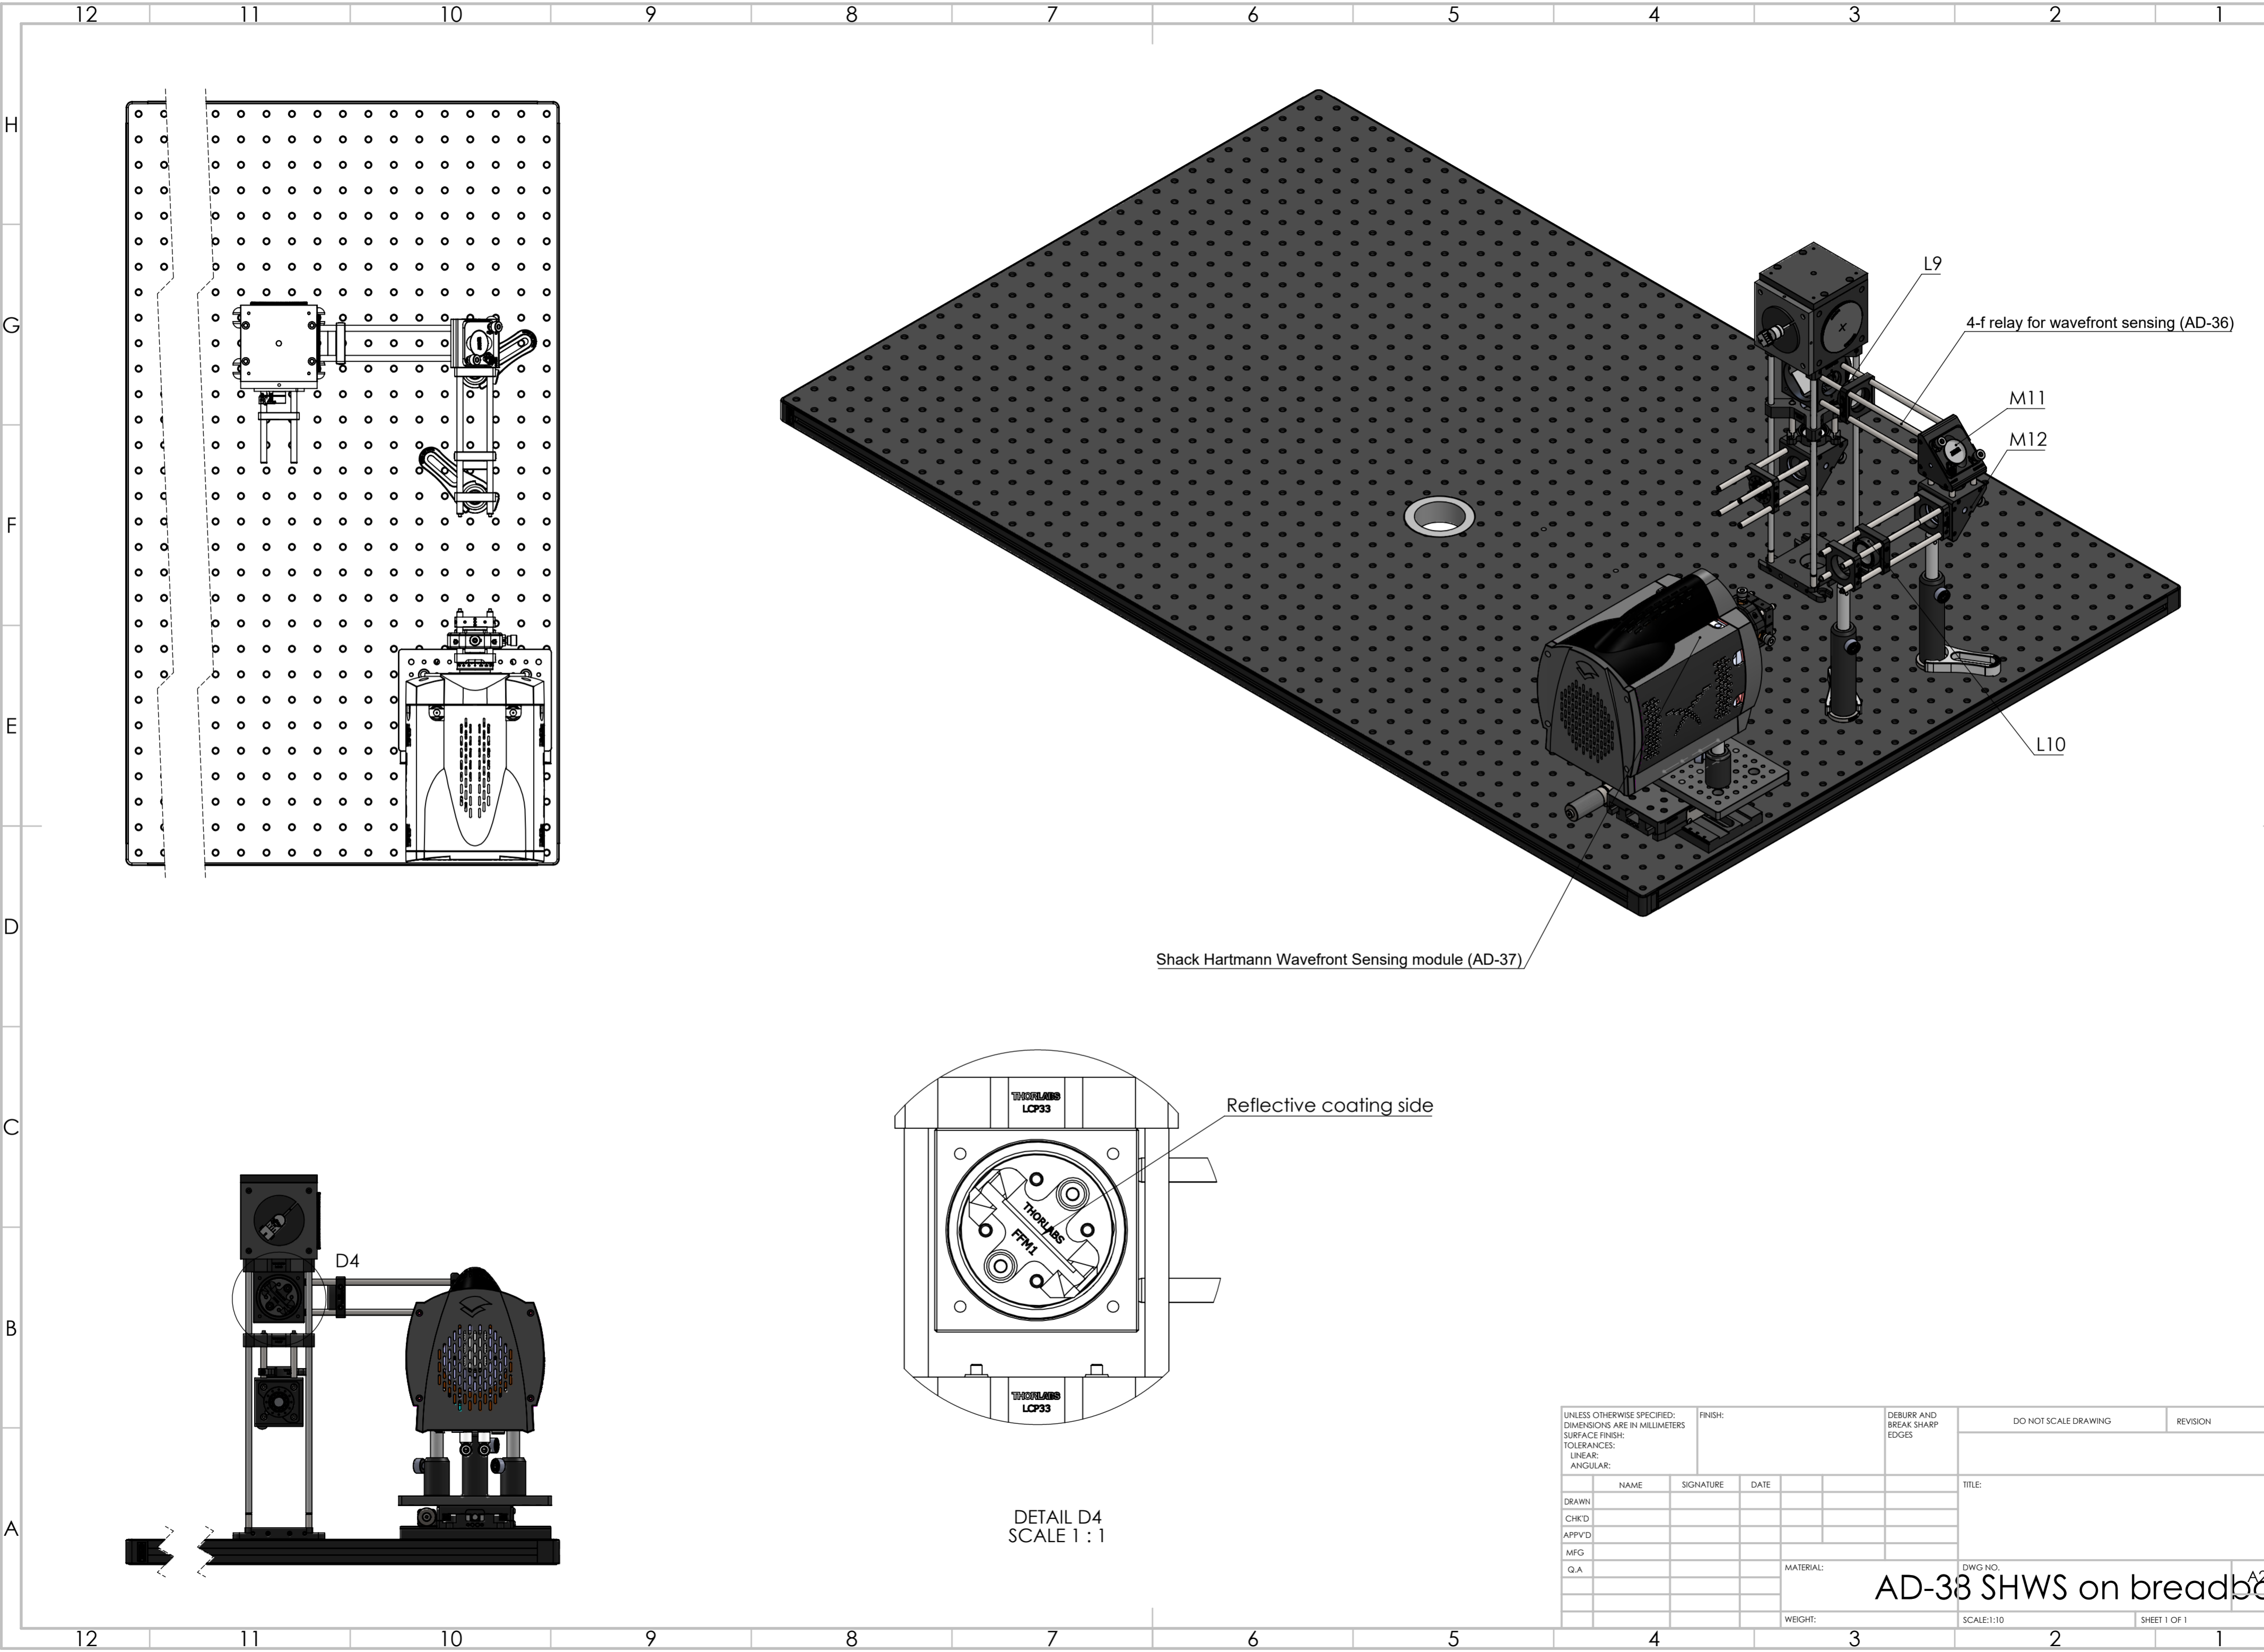

|                                                                                                                       |  |           |  |      |         |  |                                    |           |                      |  |          |                       |  |  |  |              |  |  |  |  |  |  |  |
|-----------------------------------------------------------------------------------------------------------------------|--|-----------|--|------|---------|--|------------------------------------|-----------|----------------------|--|----------|-----------------------|--|--|--|--------------|--|--|--|--|--|--|--|
| UNLESS OTHERWISE SPECIFIED:<br>DIMENSIONS ARE IN MILLIMETERS<br>SURFACE FINISH:<br>TOLERANCES:<br>LINEAR:<br>ANGULAR: |  |           |  |      | FINISH: |  | DEBURR AND<br>BREAK SHARP<br>EDGES |           | DO NOT SCALE DRAWING |  | REVISION |                       |  |  |  |              |  |  |  |  |  |  |  |
|                                                                                                                       |  |           |  |      |         |  |                                    |           |                      |  |          |                       |  |  |  |              |  |  |  |  |  |  |  |
|                                                                                                                       |  |           |  |      |         |  |                                    |           |                      |  |          | TITLE:                |  |  |  |              |  |  |  |  |  |  |  |
| NAME                                                                                                                  |  | SIGNATURE |  | DATE |         |  |                                    |           |                      |  |          |                       |  |  |  |              |  |  |  |  |  |  |  |
| DRAWN                                                                                                                 |  |           |  |      |         |  |                                    |           |                      |  |          |                       |  |  |  |              |  |  |  |  |  |  |  |
| CHK'D                                                                                                                 |  |           |  |      |         |  |                                    |           |                      |  |          |                       |  |  |  |              |  |  |  |  |  |  |  |
| APP'VD                                                                                                                |  |           |  |      |         |  |                                    |           |                      |  |          |                       |  |  |  |              |  |  |  |  |  |  |  |
| MFG                                                                                                                   |  |           |  |      |         |  |                                    |           |                      |  |          |                       |  |  |  |              |  |  |  |  |  |  |  |
| Q.A                                                                                                                   |  |           |  |      |         |  |                                    |           |                      |  |          |                       |  |  |  |              |  |  |  |  |  |  |  |
|                                                                                                                       |  |           |  |      |         |  |                                    | MATERIAL: |                      |  |          | DWG NO.               |  |  |  |              |  |  |  |  |  |  |  |
|                                                                                                                       |  |           |  |      |         |  |                                    |           |                      |  |          | AD-38 SHWS on breadbo |  |  |  |              |  |  |  |  |  |  |  |
|                                                                                                                       |  |           |  |      |         |  |                                    | WEIGHT:   |                      |  |          | SCALE:1:10            |  |  |  | SHEET 1 OF 1 |  |  |  |  |  |  |  |

AD-38 SHWS on breadboard
