# Supplementary material for: Construction and use of an adaptive optics two-photon microscope with direct wavefront sensing
Source: Springer Nature journal article supplement (doi:10.1038/s41596-023-00893-w), 2023-11-01
Supplement: MOESM1 [file 41596_2023_893_MOESM1_ESM.zip]

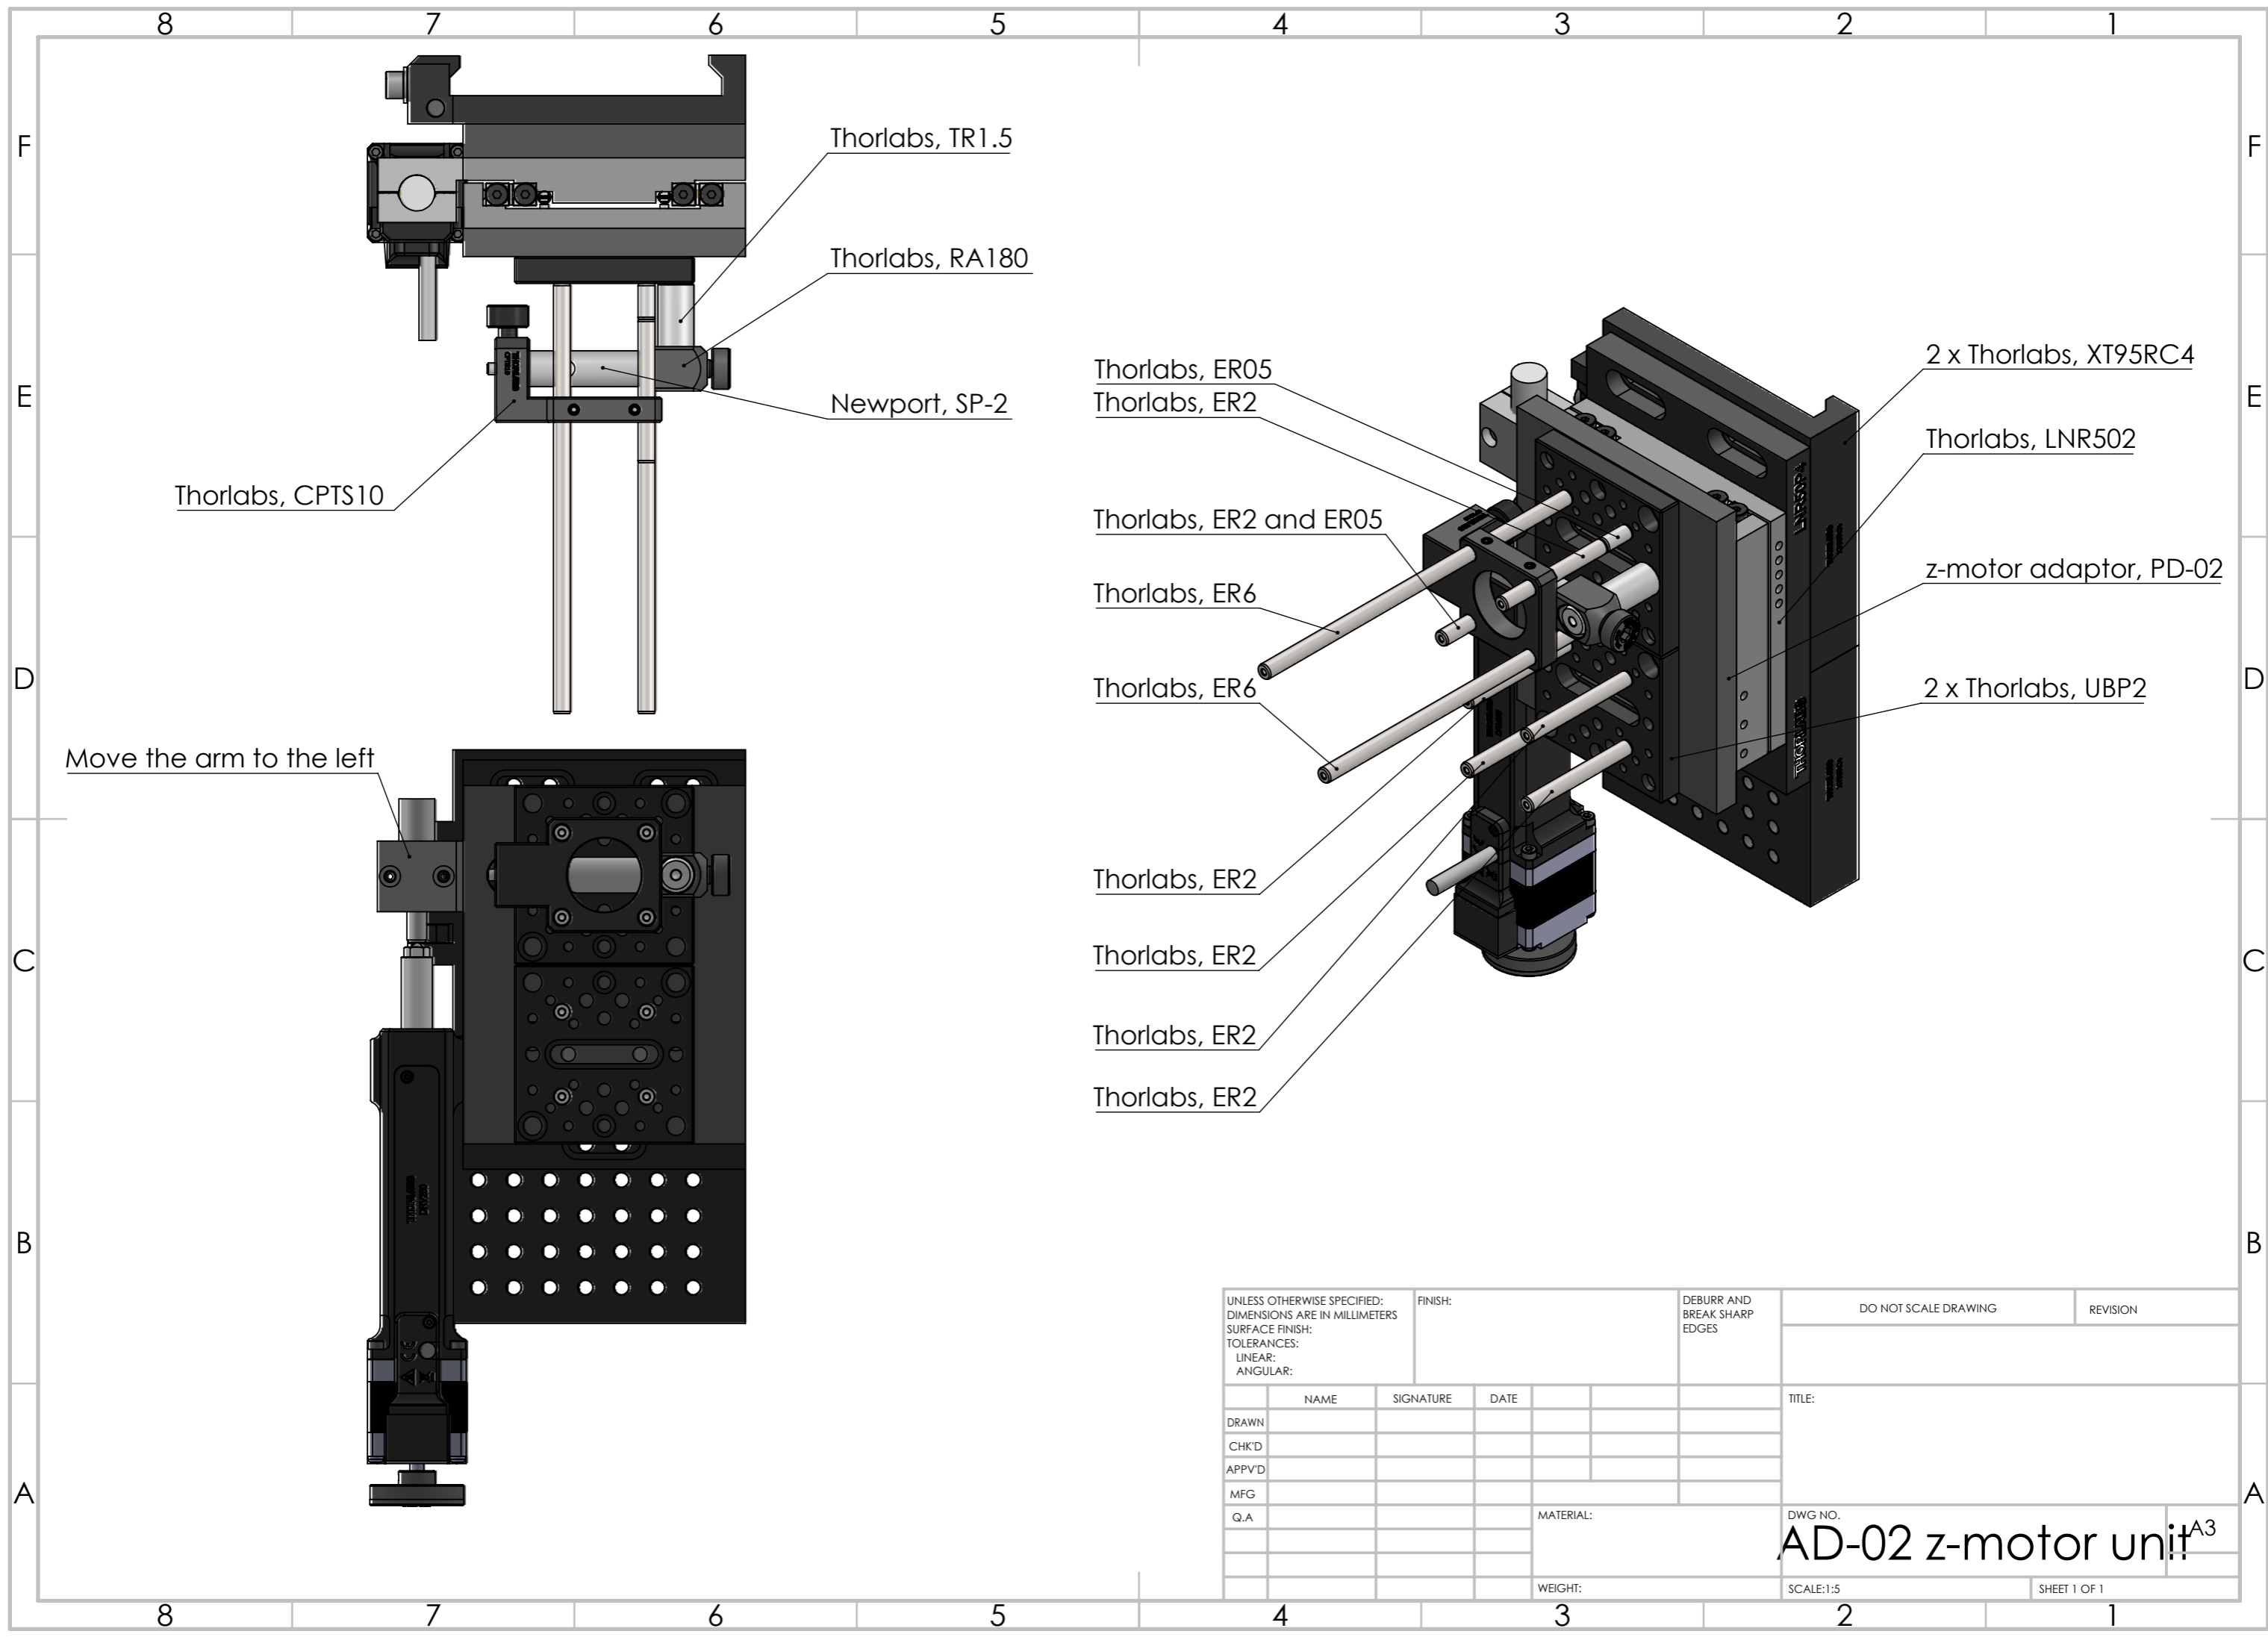

|                                                                                                                       |      |  |           |         |      |                                    |    |                      |                                                    |          |  |
|-----------------------------------------------------------------------------------------------------------------------|------|--|-----------|---------|------|------------------------------------|----|----------------------|----------------------------------------------------|----------|--|
| UNLESS OTHERWISE SPECIFIED:<br>DIMENSIONS ARE IN MILLIMETERS<br>SURFACE FINISH:<br>TOLERANCES:<br>LINEAR:<br>ANGULAR: |      |  |           | FINISH: |      | DEBURR AND<br>BREAK SHARP<br>EDGES |    | DO NOT SCALE DRAWING |                                                    | REVISION |  |
|                                                                                                                       |      |  |           |         |      |                                    |    |                      |                                                    |          |  |
|                                                                                                                       | NAME |  | SIGNATURE |         | DATE |                                    |    |                      | TITLE:                                             |          |  |
| DRAWN                                                                                                                 |      |  |           |         |      |                                    |    |                      |                                                    |          |  |
| CHK'D                                                                                                                 |      |  |           |         |      |                                    |    |                      |                                                    |          |  |
| APPV'D                                                                                                                |      |  |           |         |      |                                    |    |                      |                                                    |          |  |
| MFG                                                                                                                   |      |  |           |         |      |                                    |    |                      |                                                    |          |  |
| Q.A                                                                                                                   |      |  |           |         |      |                                    |    |                      |                                                    |          |  |
|                                                                                                                       |      |  |           |         |      |                                    |    |                      |                                                    |          |  |
|                                                                                                                       |      |  |           |         |      |                                    |    |                      | DWG NO.<br><b>AD-02 z-motor unit</b> <sup>A3</sup> |          |  |
|                                                                                                                       |      |  |           |         |      |                                    |    |                      |                                                    |          |  |
|                                                                                                                       |      |  |           |         |      |                                    |    |                      |                                                    |          |  |
|                                                                                                                       |      |  |           |         |      |                                    |    |                      |                                                    |          |  |
|                                                                                                                       |      |  |           |         |      |                                    |    |                      |                                                    |          |  |
|                                                                                                                       |      |  |           |         |      |                                    |    |                      |                                                    |          |  |
|                                                                                                                       |      |  |           |         |      |                                    |    |                      |                                                    |          |  |
|                                                                                                                       |      |  |           |         |      |                                    |    |                      |                                                    |          |  |
|                                                                                                                       |      |  |           |         |      |                                    |    |                      |                                                    |          |  |
|                                                                                                                       |      |  |           |         |      |                                    |    |                      |                                                    |          |  |
|                                                                                                                       |      |  |           |         |      |                                    |    |                      |                                                    |          |  |
|                                                                                                                       |      |  |           |         |      |                                    |    |                      |                                                    |          |  |
|                                                                                                                       |      |  |           |         |      |                                    |    |                      |                                                    |          |  |
|                                                                                                                       |      |  |           |         |      |                                    |    |                      |                                                    |          |  |
|                                                                                                                       |      |  |           |         |      |                                    |    |                      |                                                    |          |  |
|                                                                                                                       |      |  |           |         |      |                                    |    |                      |                                                    |          |  |
|                                                                                                                       |      |  |           |         |      |                                    |    |                      |                                                    |          |  |
|                                                                                                                       |      |  |           |         |      |                                    |    |                      |                                                    |          |  |
|                                                                                                                       |      |  |           |         |      |                                    |    |                      |                                                    |          |  |
|                                                                                                                       |      |  |           |         |      |                                    |    |                      |                                                    |          |  |
|                                                                                                                       |      |  |           |         |      |                                    |    |                      |                                                    |          |  |
|                                                                                                                       |      |  |           |         |      |                                    |    |                      |                                                    |          |  |
|                                                                                                                       |      |  |           |         |      |                                    |    |                      |                                                    |          |  |
|                                                                                                                       |      |  |           |         |      |                                    |    |                      |                                                    |          |  |
|                                                                                                                       |      |  |           |         |      |                                    |    |                      |                                                    |          |  |
|                                                                                                                       |      |  |           |         |      |                                    |    |                      |                                                    |          |  |
|                                                                                                                       |      |  |           |         |      |                                    |    |                      |                                                    |          |  |
|                                                                                                                       |      |  |           |         |      |                                    |    |                      |                                                    |          |  |
|                                                                                                                       |      |  |           |         |      |                                    |    |                      |                                                    |          |  |
|                                                                                                                       |      |  |           |         |      |                                    |    |                      |                                                    |          |  |
|                                                                                                                       |      |  |           |         |      |                                    |    |                      |                                                    |          |  |
|                                                                                                                       |      |  |           |         |      |                                    |    |                      |                                                    |          |  |
|                                                                                                                       |      |  |           |         |      |                                    |    |                      |                                                    |          |  |
|                                                                                                                       |      |  |           |         |      |                                    |    |                      |                                                    |          |  |
|                                                                                                                       |      |  |           |         |      |                                    |    |                      |                                                    |          |  |
|                                                                                                                       |      |  |           |         |      |                                    |    |                      |                                                    |          |  |
|                                                                                                                       |      |  |           |         |      |                                    |    |                      |                                                    |          |  |
|                                                                                                                       |      |  |           |         |      |                                    |    |                      |                                                    |          |  |
|                                                                                                                       |      |  |           |         |      |                                    |    |                      |                                                    |          |  |
|                                                                                                                       |      |  |           |         |      |                                    |    |                      |                                                    |          |  |
|                                                                                                                       |      |  |           |         |      |                                    |    |                      |                                                    |          |  |
|                                                                                                                       |      |  |           |         |      |                                    |    |                      |                                                    |          |  |
|                                                                                                                       |      |  |           |         |      |                                    |    |                      |                                                    |          |  |
|                                                                                                                       |      |  |           |         |      |                                    |    |                      |                                                    |          |  |
|                                                                                                                       |      |  |           |         |      |                                    |    |                      |                                                    |          |  |
|                                                                                                                       |      |  |           |         |      |                                    |    |                      |                                                    |          |  |
|                                                                                                                       |      |  |           |         |      |                                    |    |                      |                                                    |          |  |
|                                                                                                                       |      |  |           |         |      |                                    |    |                      |                                                    |          |  |
|                                                                                                                       |      |  |           |         |      |                                    |    |                      |                                                    |          |  |
|                                                                                                                       |      |  |           |         |      |                                    |    |                      |                                                    |          |  |
|                                                                                                                       |      |  |           |         |      |                                    |    |                      |                                                    |          |  |
|                                                                                                                       |      |  |           |         |      |                                    |    |                      |                                                    |          |  |
|                                                                                                                       |      |  |           |         |      |                                    |    |                      |                                                    |          |  |
|                                                                                                                       |      |  |           |         |      |                                    |    |                      |                                                    |          |  |
|                                                                                                                       |      |  |           |         |      |                                    |    |                      |                                                    |          |  |
|                                                                                                                       |      |  |           |         |      |                                    |    |                      |                                                    |          |  |
|                                                                                                                       |      |  |           |         |      |                                    |    |                      |                                                    |          |  |
|                                                                                                                       |      |  |           |         |      |                                    |    |                      |                                                    |          |  |
|                                                                                                                       |      |  |           |         |      |                                    |    |                      |                                                    |          |  |
|                                                                                                                       |      |  |           |         |      |                                    |    |                      |                                                    |          |  |
|                                                                                                                       |      |  |           |         |      |                                    |    |                      |                                                    |          |  |
|                                                                                                                       |      |  |           |         |      |                                    |    |                      |                                                    |          |  |
|                                                                                                                       |      |  |           |         |      |                                    |    |                      |                                                    |          |  |
|                                                                                                                       |      |  |           |         |      |                                    |    |                      |                                                    |          |  |
|                                                                                                                       |      |  |           |         |      |                                    |    |                      |                                                    |          |  |
|                                                                                                                       |      |  |           |         |      |                                    |    |                      |                                                    |          |  |
|                                                                                                                       |      |  |           |         |      |                                    |    |                      |                                                    |          |  |
|                                                                                                                       |      |  |           |         |      |                                    |    |                      |                                                    |          |  |
|                                                                                                                       |      |  |           |         |      |                                    |    |                      |                                                    |          |  |
|                                                                                                                       |      |  |           |         |      |                                    |    |                      |                                                    |          |  |
|                                                                                                                       |      |  |           |         |      |                                    |    |                      |                                                    |          |  |
|                                                                                                                       |      |  |           |         |      |                                    |    |                      |                                                    |          |  |
|                                                                                                                       |      |  |           |         |      |                                    |    |                      |                                                    |          |  |
|                                                                                                                       |      |  |           |         |      |                                    |    |                      |                                                    |          |  |
|                                                                                                                       |      |  |           |         |      |                                    |    |                      |                                                    |          |  |
|                                                                                                                       |      |  |           |         |      |                                    |    |                      |                                                    |          |  |
|                                                                                                                       |      |  |           |         |      |                                    |    |                      |                                                    |          |  |
|                                                                                                                       |      |  |           |         |      |                                    |    |                      |                                                    |          |  |
|                                                                                                                       |      |  |           |         |      |                                    |    |                      |                                                    |          |  |
|                                                                                                                       |      |  |           |         |      |                                    |    |                      |                                                    |          |  |
|                                                                                                                       |      |  |           |         |      |                                    |    |                      |                                                    |          |  |
|                                                                                                                       |      |  |           |         |      |                                    |    |                      |                                                    |          |  |
|                                                                                                                       |      |  |           |         |      |                                    |    |                      |                                                    |          |  |
|                                                                                                                       |      |  |           |         |      |                                    |    |                      |                                                    |          |  |
|                                                                                                                       |      |  |           |         |      |                                    |    |                      |                                                    |          |  |
|                                                                                                                       |      |  |           |         |      |                                    |    |                      |                                                    |          |  |
|                                                                                                                       |      |  |           |         |      |                                    |    |                      |                                                    |          |  |
|                                                                                                                       |      |  |           |         |      |                                    |    |                      |                                                    |          |  |
|                                                                                                                       |      |  |           |         |      |                                    |    |                      |                                                    |          |  |
|                                                                                                                       |      |  |           |         |      |                                    |    |                      |                                                    |          |  |
|                                                                                                                       |      |  |           |         |      |                                    | </ |                      |                                                    |          |  |
