# Supplementary material for: Construction and use of an adaptive optics two-photon microscope with direct wavefront sensing
Source: Springer Nature journal article supplement (doi:10.1038/s41596-023-00893-w), 2023-11-01
Supplement: MOESM1 [file 41596_2023_893_MOESM1_ESM.zip]

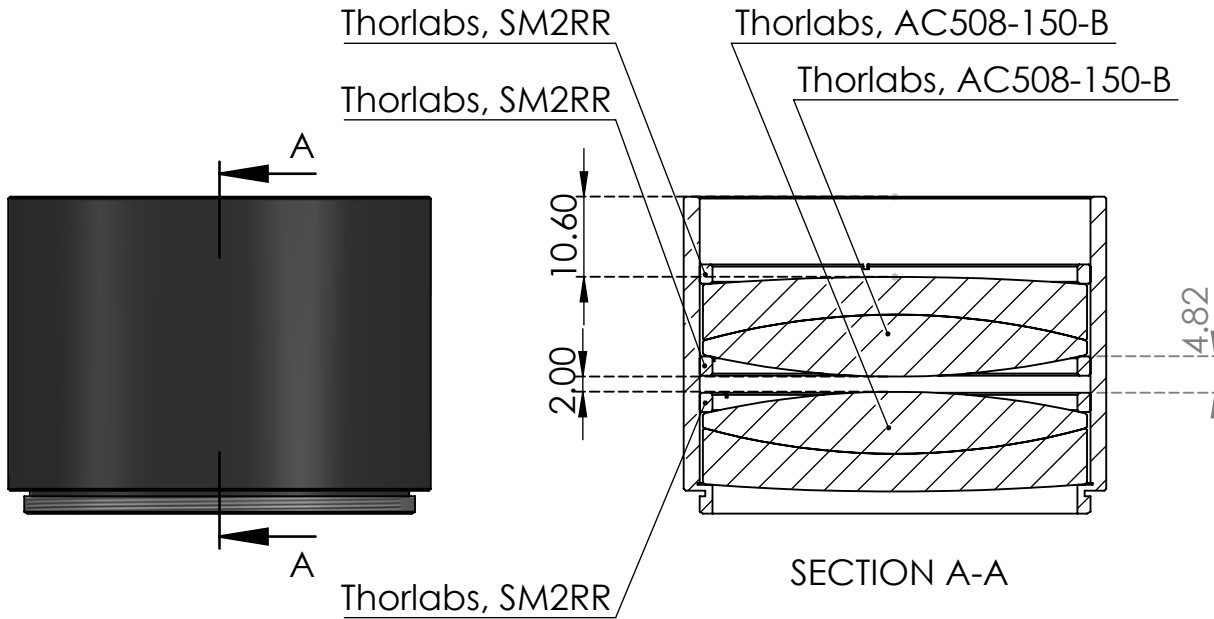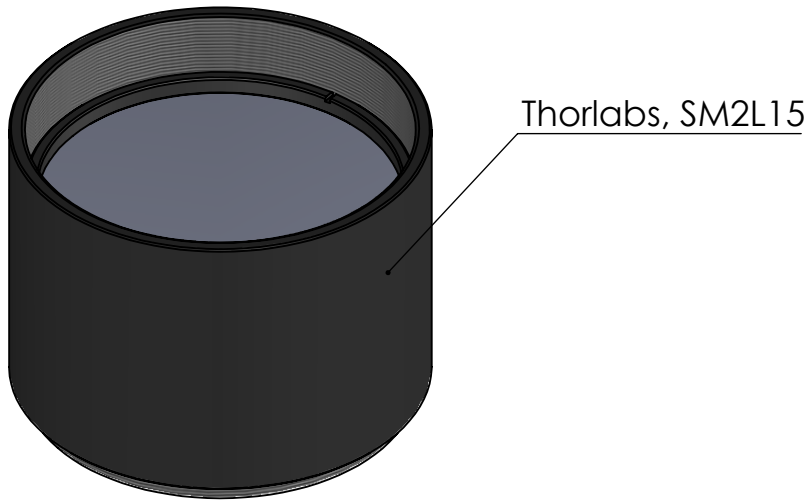

UNLESS OTHERWISE SPECIFIED:  
DIMENSIONS ARE IN MILLIMETERS  
SURFACE FINISH:  
TOLERANCES:  
LINEAR:  
ANGULAR:

FINISH:

DEBURR AND  
BREAK SHARP  
EDGES

DO NOT SCALE DRAWING

REVISION

|        | NAME | SIGNATURE | DATE |  |  |
|--------|------|-----------|------|--|--|
| DRAWN  |      |           |      |  |  |
| CHK'D  |      |           |      |  |  |
| APPV'D |      |           |      |  |  |
| MFG    |      |           |      |  |  |
| Q.A    |      |           |      |  |  |
|        |      |           |      |  |  |
|        |      |           |      |  |  |
|        |      |           |      |  |  |
|        |      |           |      |  |  |

MATERIAL:

WEIGHT:

TITLE:

DWG NO.

SCALE:1:1

SHEET 1 OF 1

AD-05 L5L6

A4
