# Supplementary material for: Construction and use of an adaptive optics two-photon microscope with direct wavefront sensing
Source: Springer Nature journal article supplement (doi:10.1038/s41596-023-00893-w), 2023-11-01
Supplement: MOESM1 [file 41596_2023_893_MOESM1_ESM.zip]

4 3 2 1

F F

Cambridge Technology  
6-mm 8315K X-galvo

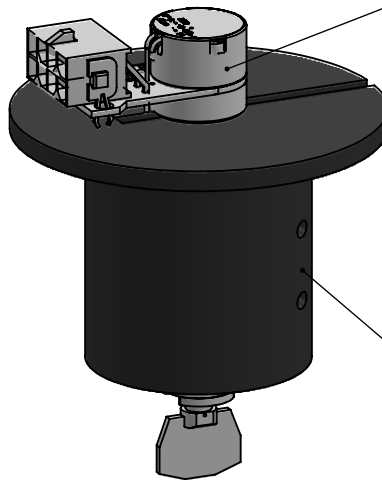

E E

X galvo Holder (PD-05)

D D

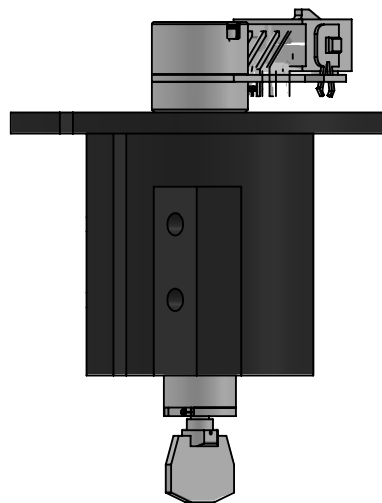

C C

B B

UNLESS OTHERWISE SPECIFIED:  
DIMENSIONS ARE IN MILLIMETERS  
SURFACE FINISH:  
TOLERANCES:  
LINEAR:  
ANGULAR:

FINISH:

DEBURR AND  
BREAK SHARP  
EDGES

DO NOT SCALE DRAWING

REVISION

|        | NAME | SIGNATURE | DATE |  |  |
|--------|------|-----------|------|--|--|
| DRAWN  |      |           |      |  |  |
| CHK'D  |      |           |      |  |  |
| APPV'D |      |           |      |  |  |
| MFG    |      |           |      |  |  |
| Q.A    |      |           |      |  |  |
|        |      |           |      |  |  |
|        |      |           |      |  |  |
|        |      |           |      |  |  |
|        |      |           |      |  |  |

TITLE:

MATERIAL:

DWG NO.

WEIGHT:

SCALE:1:2

SHEET 1 OF 1

AD-06 Galvo scanner X

A4

4 3 2 1

A A
