# Supplementary material for: Construction and use of an adaptive optics two-photon microscope with direct wavefront sensing
Source: Springer Nature journal article supplement (doi:10.1038/s41596-023-00893-w), 2023-11-01
Supplement: MOESM1 [file 41596_2023_893_MOESM1_ESM.zip]

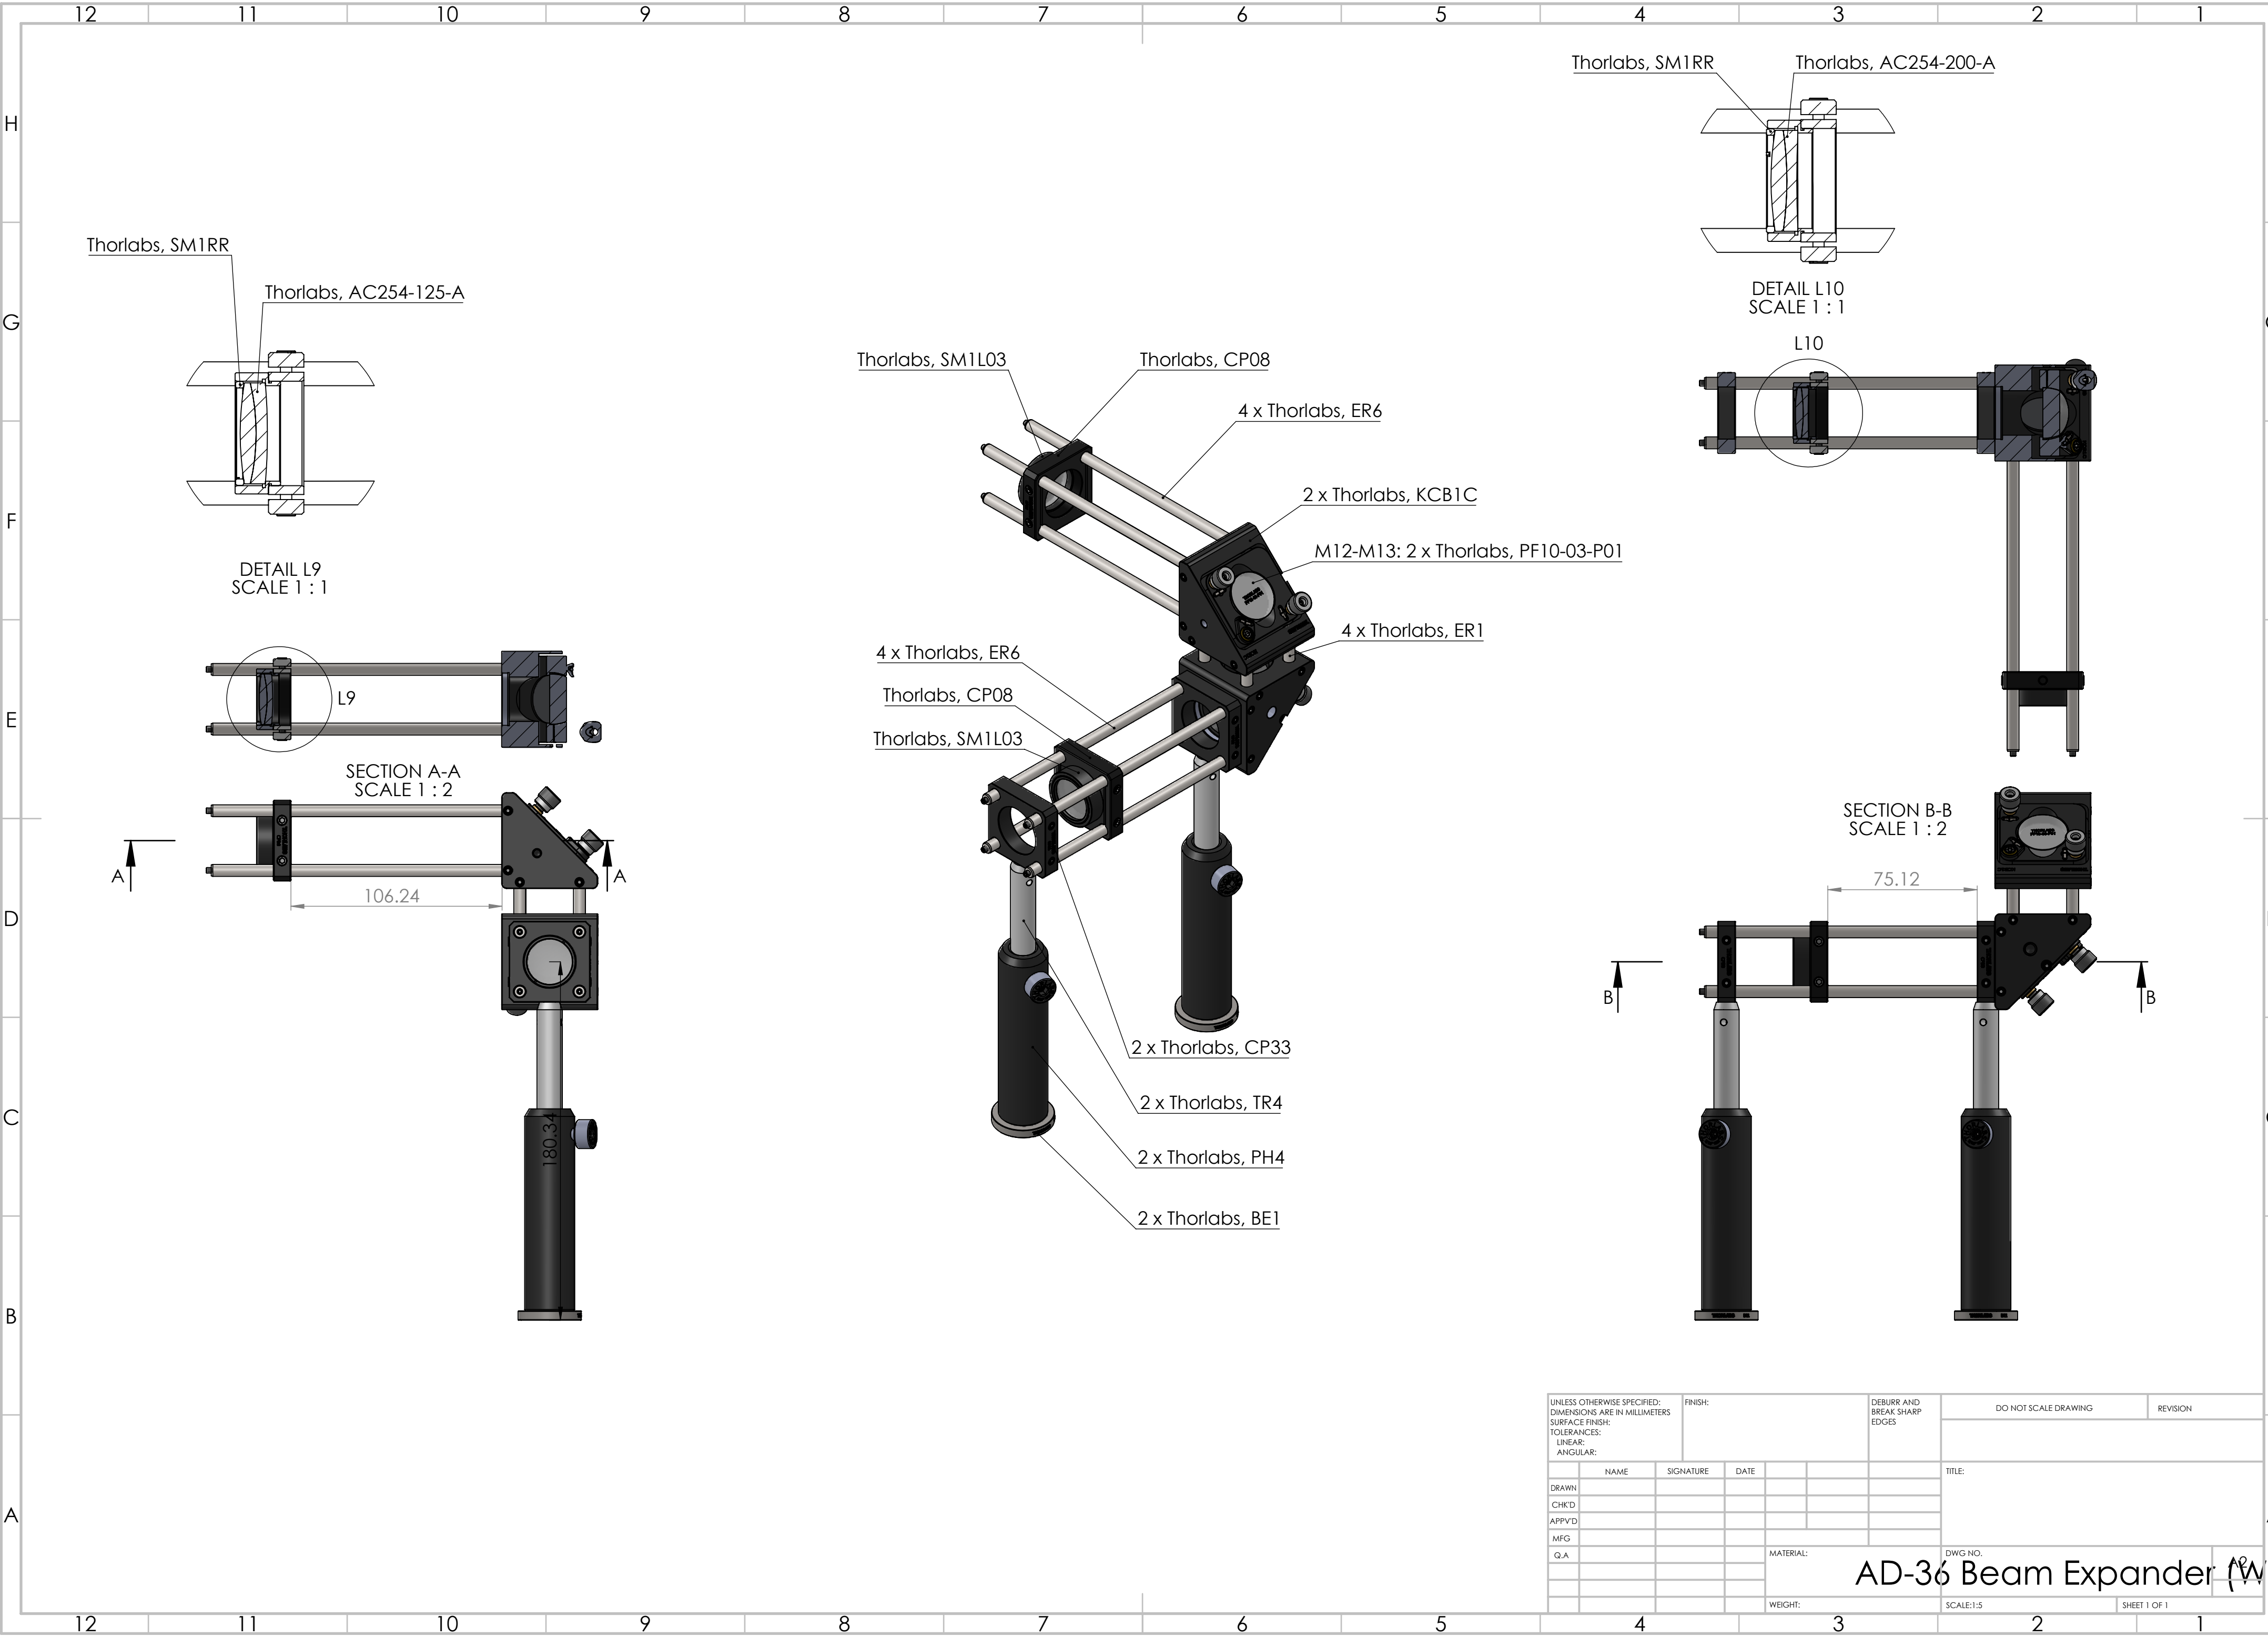

|                                                                                                                       |           |                                    |                      |  |              |  |
|-----------------------------------------------------------------------------------------------------------------------|-----------|------------------------------------|----------------------|--|--------------|--|
| UNLESS OTHERWISE SPECIFIED:<br>DIMENSIONS ARE IN MILLIMETERS<br>SURFACE FINISH:<br>TOLERANCES:<br>LINEAR:<br>ANGULAR: | FINISH:   | DEBURR AND<br>BREAK SHARP<br>EDGES | DO NOT SCALE DRAWING |  | REVISION     |  |
|                                                                                                                       |           |                                    |                      |  |              |  |
|                                                                                                                       |           |                                    |                      |  |              |  |
|                                                                                                                       |           |                                    |                      |  |              |  |
| NAME                                                                                                                  | SIGNATURE | DATE                               |                      |  | TITLE:       |  |
| DRAWN                                                                                                                 |           |                                    |                      |  |              |  |
| CHK'D                                                                                                                 |           |                                    |                      |  |              |  |
| APP'VD                                                                                                                |           |                                    |                      |  |              |  |
| MFG                                                                                                                   |           |                                    |                      |  |              |  |
| Q.A.                                                                                                                  |           |                                    |                      |  | DWG NO.      |  |
|                                                                                                                       |           |                                    |                      |  | MATERIAL:    |  |
|                                                                                                                       |           |                                    |                      |  | WEIGHT:      |  |
|                                                                                                                       |           |                                    |                      |  | SCALE:1:5    |  |
|                                                                                                                       |           |                                    |                      |  | SHEET 1 OF 1 |  |

AD-36 Beam Expander (WFS)
