# Supplementary material for: Construction and use of an adaptive optics two-photon microscope with direct wavefront sensing
Source: Springer Nature journal article supplement (doi:10.1038/s41596-023-00893-w), 2023-11-01
Supplement: MOESM1 [file 41596_2023_893_MOESM1_ESM.zip]

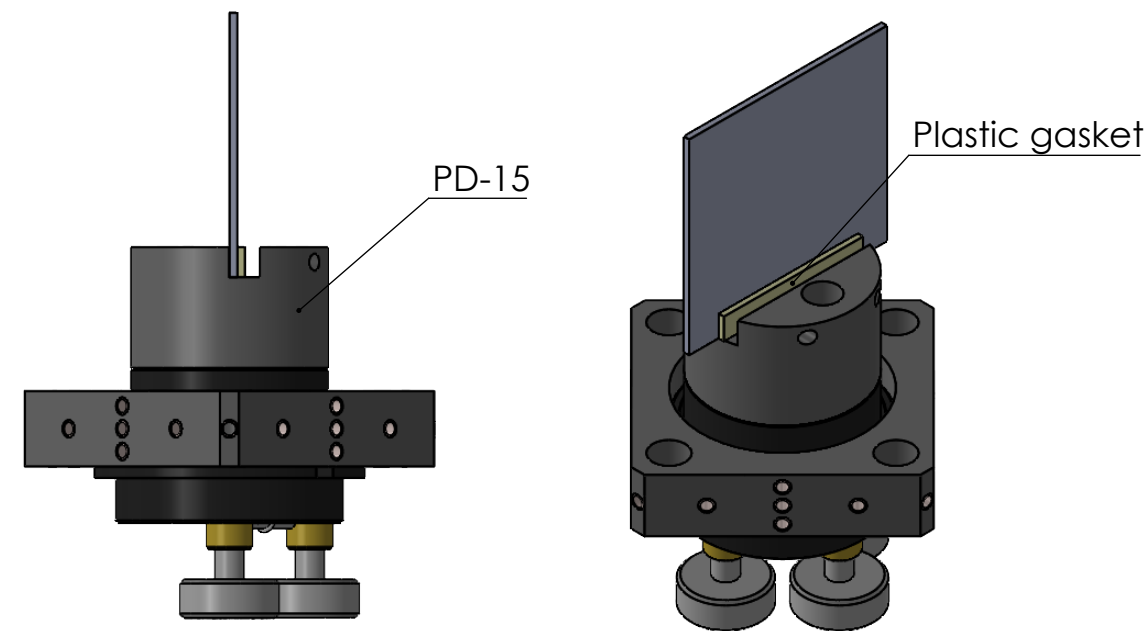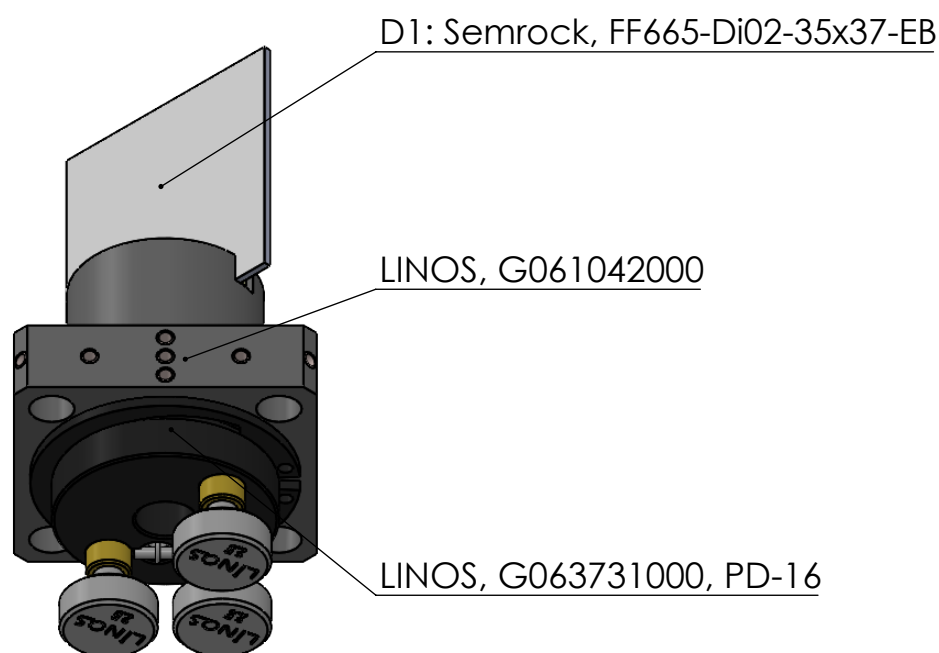

|                                                                                                                       |        |           |      |         |  |                              |  |                      |  |          |  |
|-----------------------------------------------------------------------------------------------------------------------|--------|-----------|------|---------|--|------------------------------|--|----------------------|--|----------|--|
| UNLESS OTHERWISE SPECIFIED:<br>DIMENSIONS ARE IN MILLIMETERS<br>SURFACE FINISH:<br>TOLERANCES:<br>LINEAR:<br>ANGULAR: |        |           |      | FINISH: |  | DEBURR AND BREAK SHARP EDGES |  | DO NOT SCALE DRAWING |  | REVISION |  |
|                                                                                                                       |        |           |      |         |  |                              |  |                      |  |          |  |
| A                                                                                                                     | NAME   | SIGNATURE | DATE |         |  | TITLE:                       |  |                      |  |          |  |
|                                                                                                                       | DRAWN  |           |      |         |  |                              |  |                      |  |          |  |
|                                                                                                                       | CHK'D  |           |      |         |  |                              |  |                      |  |          |  |
|                                                                                                                       | APPV'D |           |      |         |  |                              |  |                      |  |          |  |
|                                                                                                                       | MFG    |           |      |         |  |                              |  |                      |  |          |  |
|                                                                                                                       | Q.A    |           |      |         |  | MATERIAL:                    |  | DWG NO.              |  | AD-21 D1 |  |
|                                                                                                                       |        |           |      |         |  |                              |  |                      |  |          |  |
|                                                                                                                       |        |           |      | WEIGHT: |  | SCALE:1:2                    |  | SHEET 1 OF 1         |  |          |  |
