# Supplementary material for: Construction and use of an adaptive optics two-photon microscope with direct wavefront sensing
Source: Springer Nature journal article supplement (doi:10.1038/s41596-023-00893-w), 2023-11-01
Supplement: MOESM1 [file 41596_2023_893_MOESM1_ESM.zip]

4 3 2 1

F F

E E

D D

C C

B B

A A

Thorlabs, LA1765-A

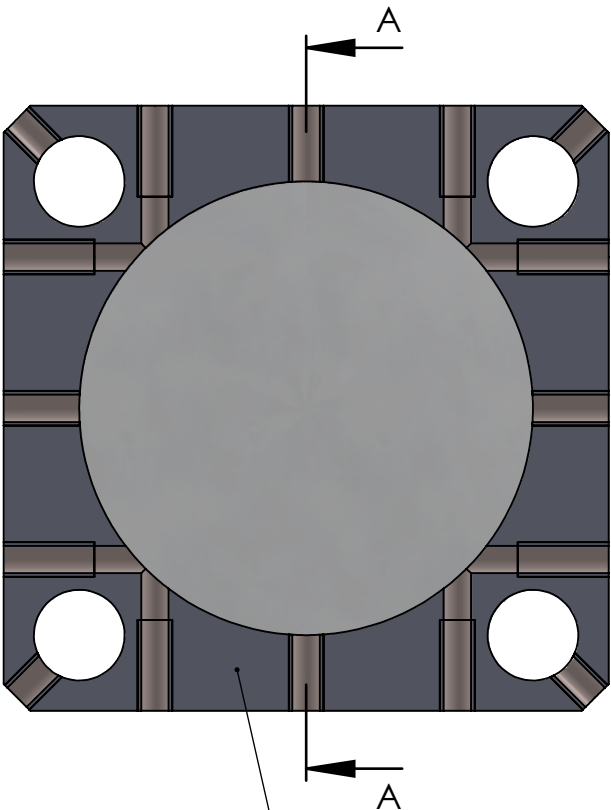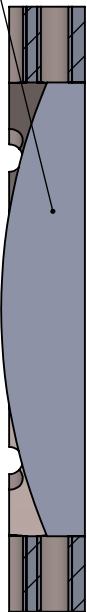

SECTION A-A

Microbench, G061042000, PD-17

UNLESS OTHERWISE SPECIFIED:  
DIMENSIONS ARE IN MILLIMETERS  
SURFACE FINISH:  
TOLERANCES:  
LINEAR:  
ANGULAR:

FINISH:

DEBURR AND  
BREAK SHARP  
EDGES

DO NOT SCALE DRAWING

REVISION

|        | NAME | SIGNATURE | DATE |  |  |
|--------|------|-----------|------|--|--|
| DRAWN  |      |           |      |  |  |
| CHK'D  |      |           |      |  |  |
| APPV'D |      |           |      |  |  |
| MFG    |      |           |      |  |  |
| Q.A    |      |           |      |  |  |

|              |           |
|--------------|-----------|
| TITLE:       |           |
| DWG NO.      | AD-24 L11 |
| SCALE:2:1    |           |
| SHEET 1 OF 1 |           |

MATERIAL:

DWG NO.

AD-24 L11

A4

WEIGHT:

SCALE:2:1

SHEET 1 OF 1

4 3 2 Microbench, G061042000
