# Supplementary material for: Construction and use of an adaptive optics two-photon microscope with direct wavefront sensing
Source: Springer Nature journal article supplement (doi:10.1038/s41596-023-00893-w), 2023-11-01
Supplement: MOESM1 [file 41596_2023_893_MOESM1_ESM.zip]

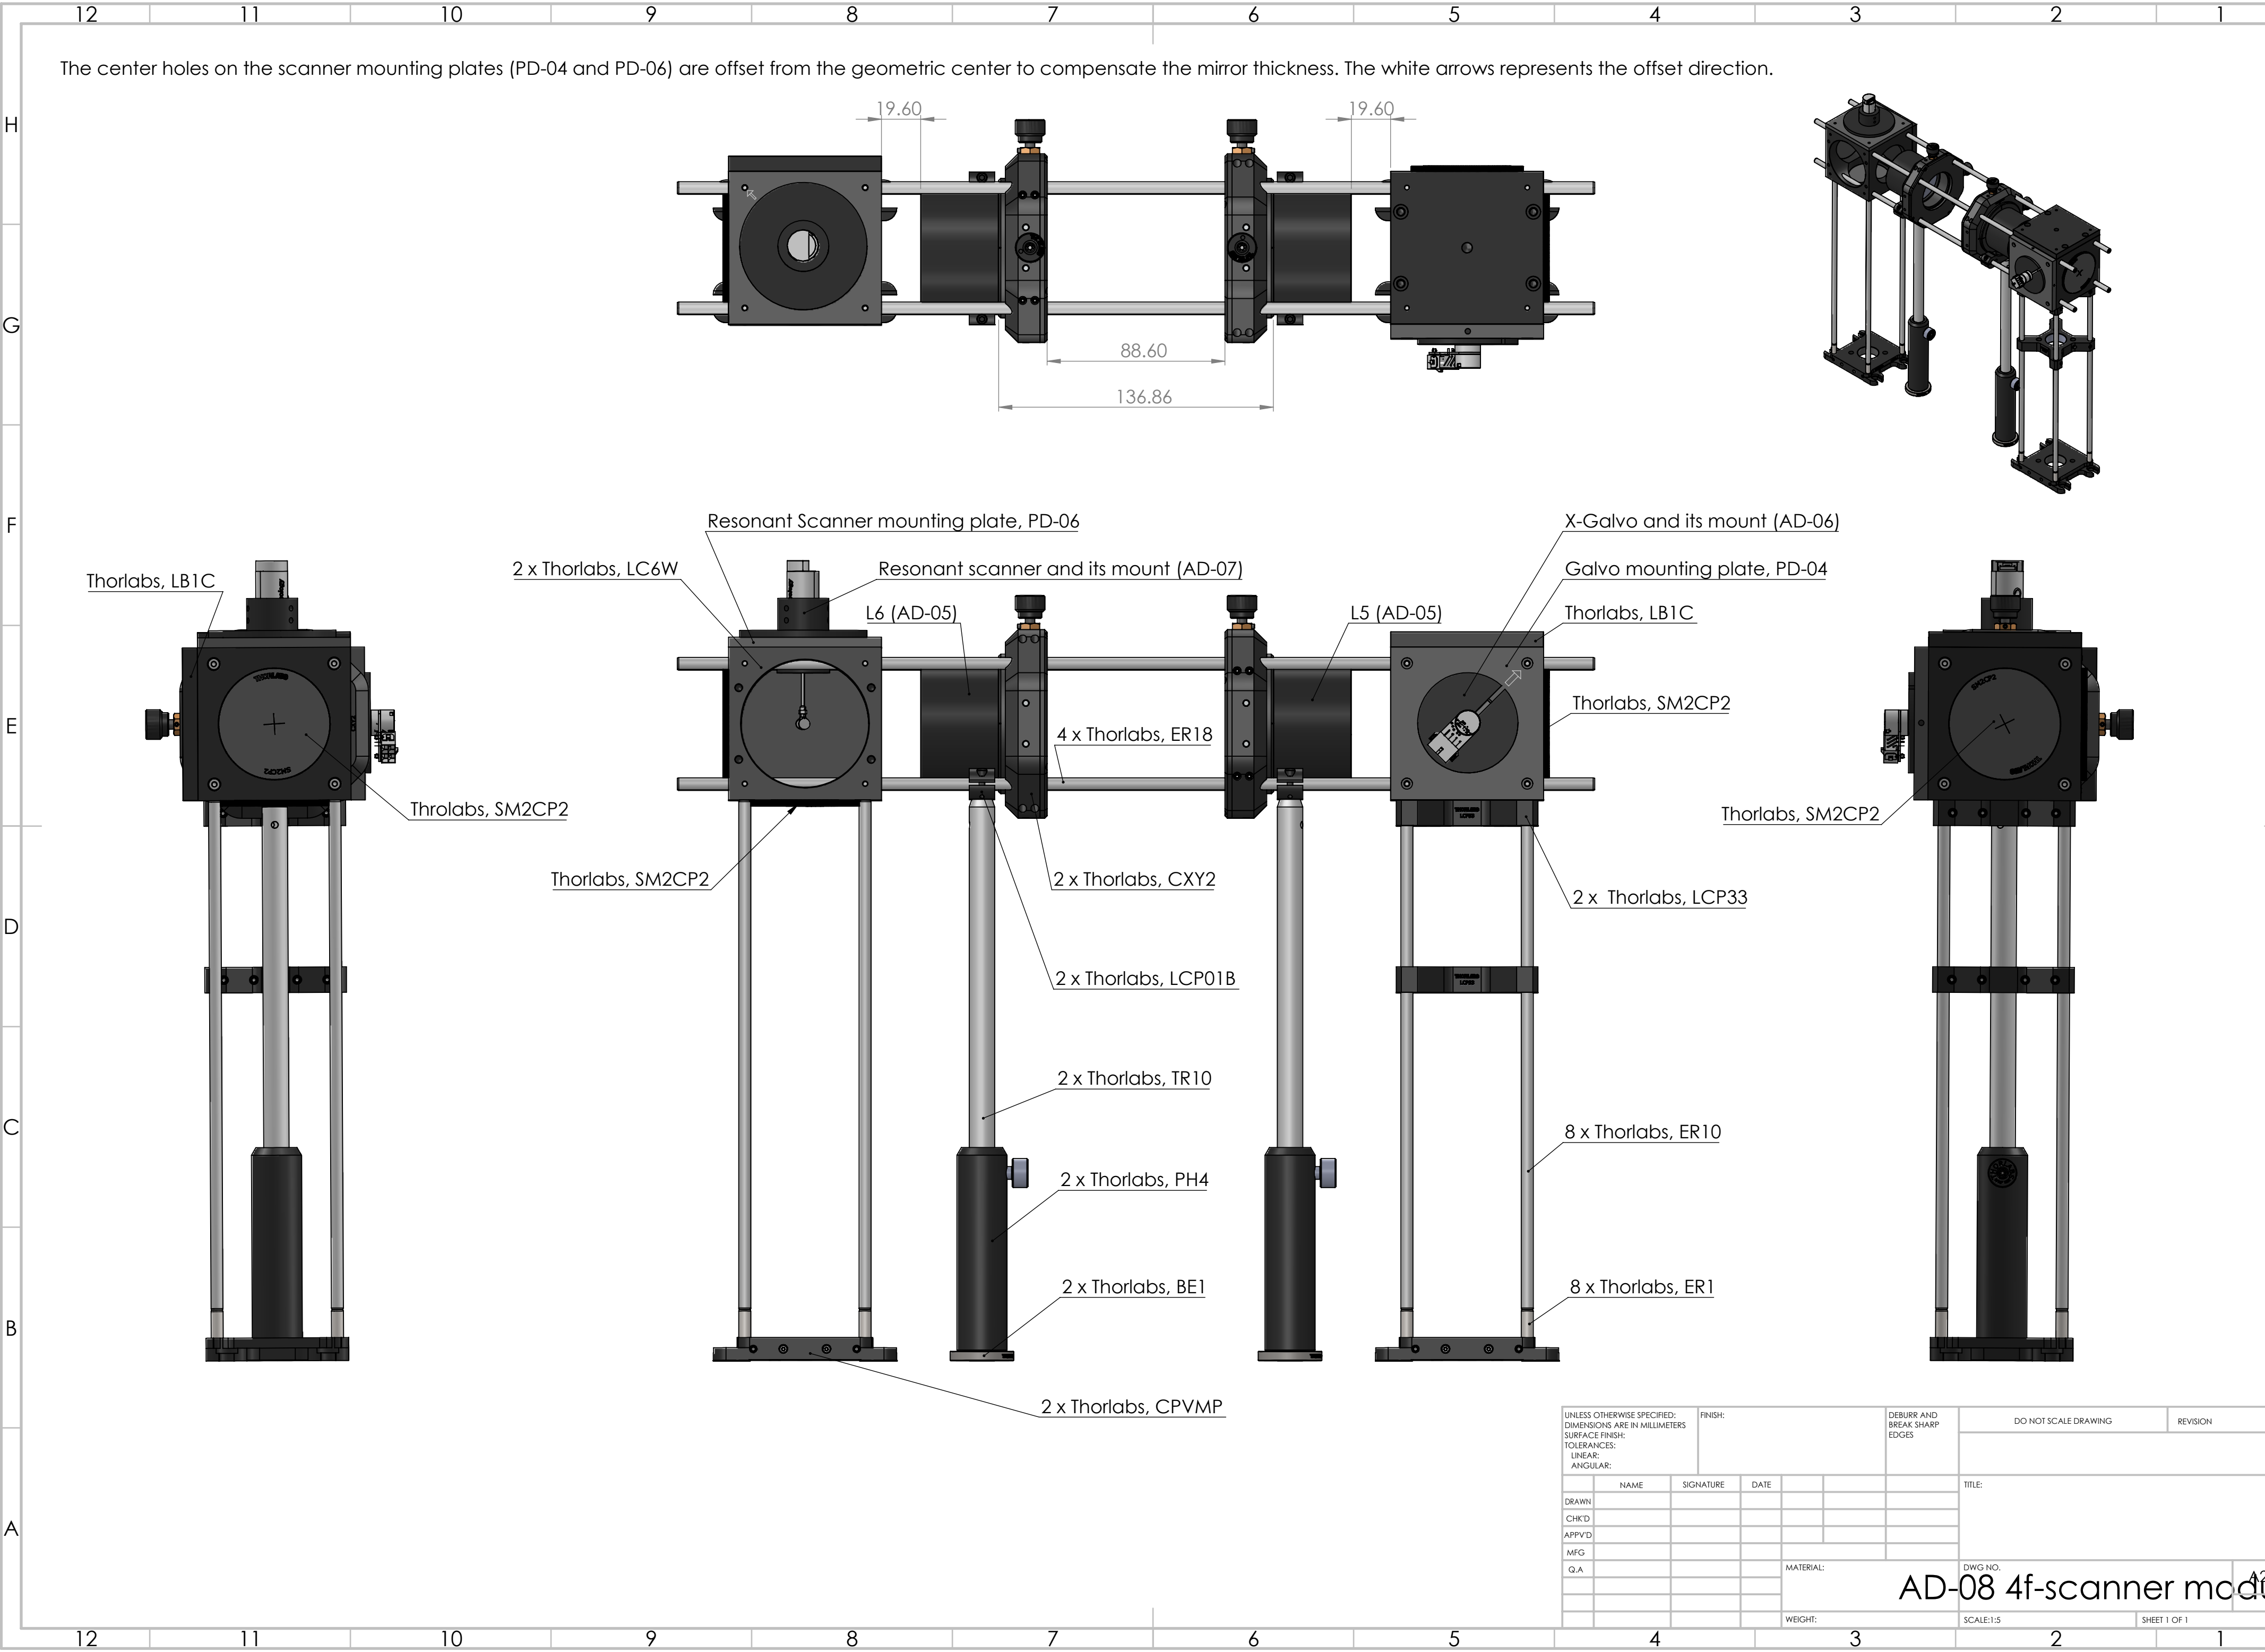

The center holes on the scanner mounting plates (PD-04 and PD-06) are offset from the geometric center to compensate the mirror thickness. The white arrows represents the offset direction.

|                                                                                                                       |  |      |  |           |  |      |         |           |                                    |                       |                      |         |          |              |  |  |  |
|-----------------------------------------------------------------------------------------------------------------------|--|------|--|-----------|--|------|---------|-----------|------------------------------------|-----------------------|----------------------|---------|----------|--------------|--|--|--|
| UNLESS OTHERWISE SPECIFIED:<br>DIMENSIONS ARE IN MILLIMETERS<br>SURFACE FINISH:<br>TOLERANCES:<br>LINEAR:<br>ANGULAR: |  |      |  |           |  |      | FINISH: |           | DEBURR AND<br>BREAK SHARP<br>EDGES |                       | DO NOT SCALE DRAWING |         | REVISION |              |  |  |  |
|                                                                                                                       |  |      |  |           |  |      |         |           |                                    |                       |                      |         |          |              |  |  |  |
|                                                                                                                       |  | NAME |  | SIGNATURE |  | DATE |         |           |                                    |                       |                      | TITLE:  |          |              |  |  |  |
| DRAWN                                                                                                                 |  |      |  |           |  |      |         |           |                                    |                       |                      |         |          |              |  |  |  |
| CHK'D                                                                                                                 |  |      |  |           |  |      |         |           |                                    |                       |                      | DWG NO. |          |              |  |  |  |
| APP'VD                                                                                                                |  |      |  |           |  |      |         |           |                                    |                       |                      |         |          |              |  |  |  |
| MFG                                                                                                                   |  |      |  |           |  |      |         |           |                                    |                       |                      |         |          |              |  |  |  |
| Q.A                                                                                                                   |  |      |  |           |  |      |         |           |                                    |                       |                      |         |          |              |  |  |  |
|                                                                                                                       |  |      |  |           |  |      |         | MATERIAL: |                                    | AD-08 4f-scanner modu |                      |         |          |              |  |  |  |
|                                                                                                                       |  |      |  |           |  |      |         |           |                                    |                       |                      |         |          |              |  |  |  |
|                                                                                                                       |  |      |  |           |  |      |         |           |                                    |                       |                      |         |          |              |  |  |  |
|                                                                                                                       |  |      |  |           |  |      |         | WEIGHT:   |                                    | SCALE:1:5             |                      |         |          | SHEET 1 OF 1 |  |  |  |
