# Supplementary material for: Construction and use of an adaptive optics two-photon microscope with direct wavefront sensing
Source: Springer Nature journal article supplement (doi:10.1038/s41596-023-00893-w), 2023-11-01
Supplement: MOESM1 [file 41596_2023_893_MOESM1_ESM.zip]

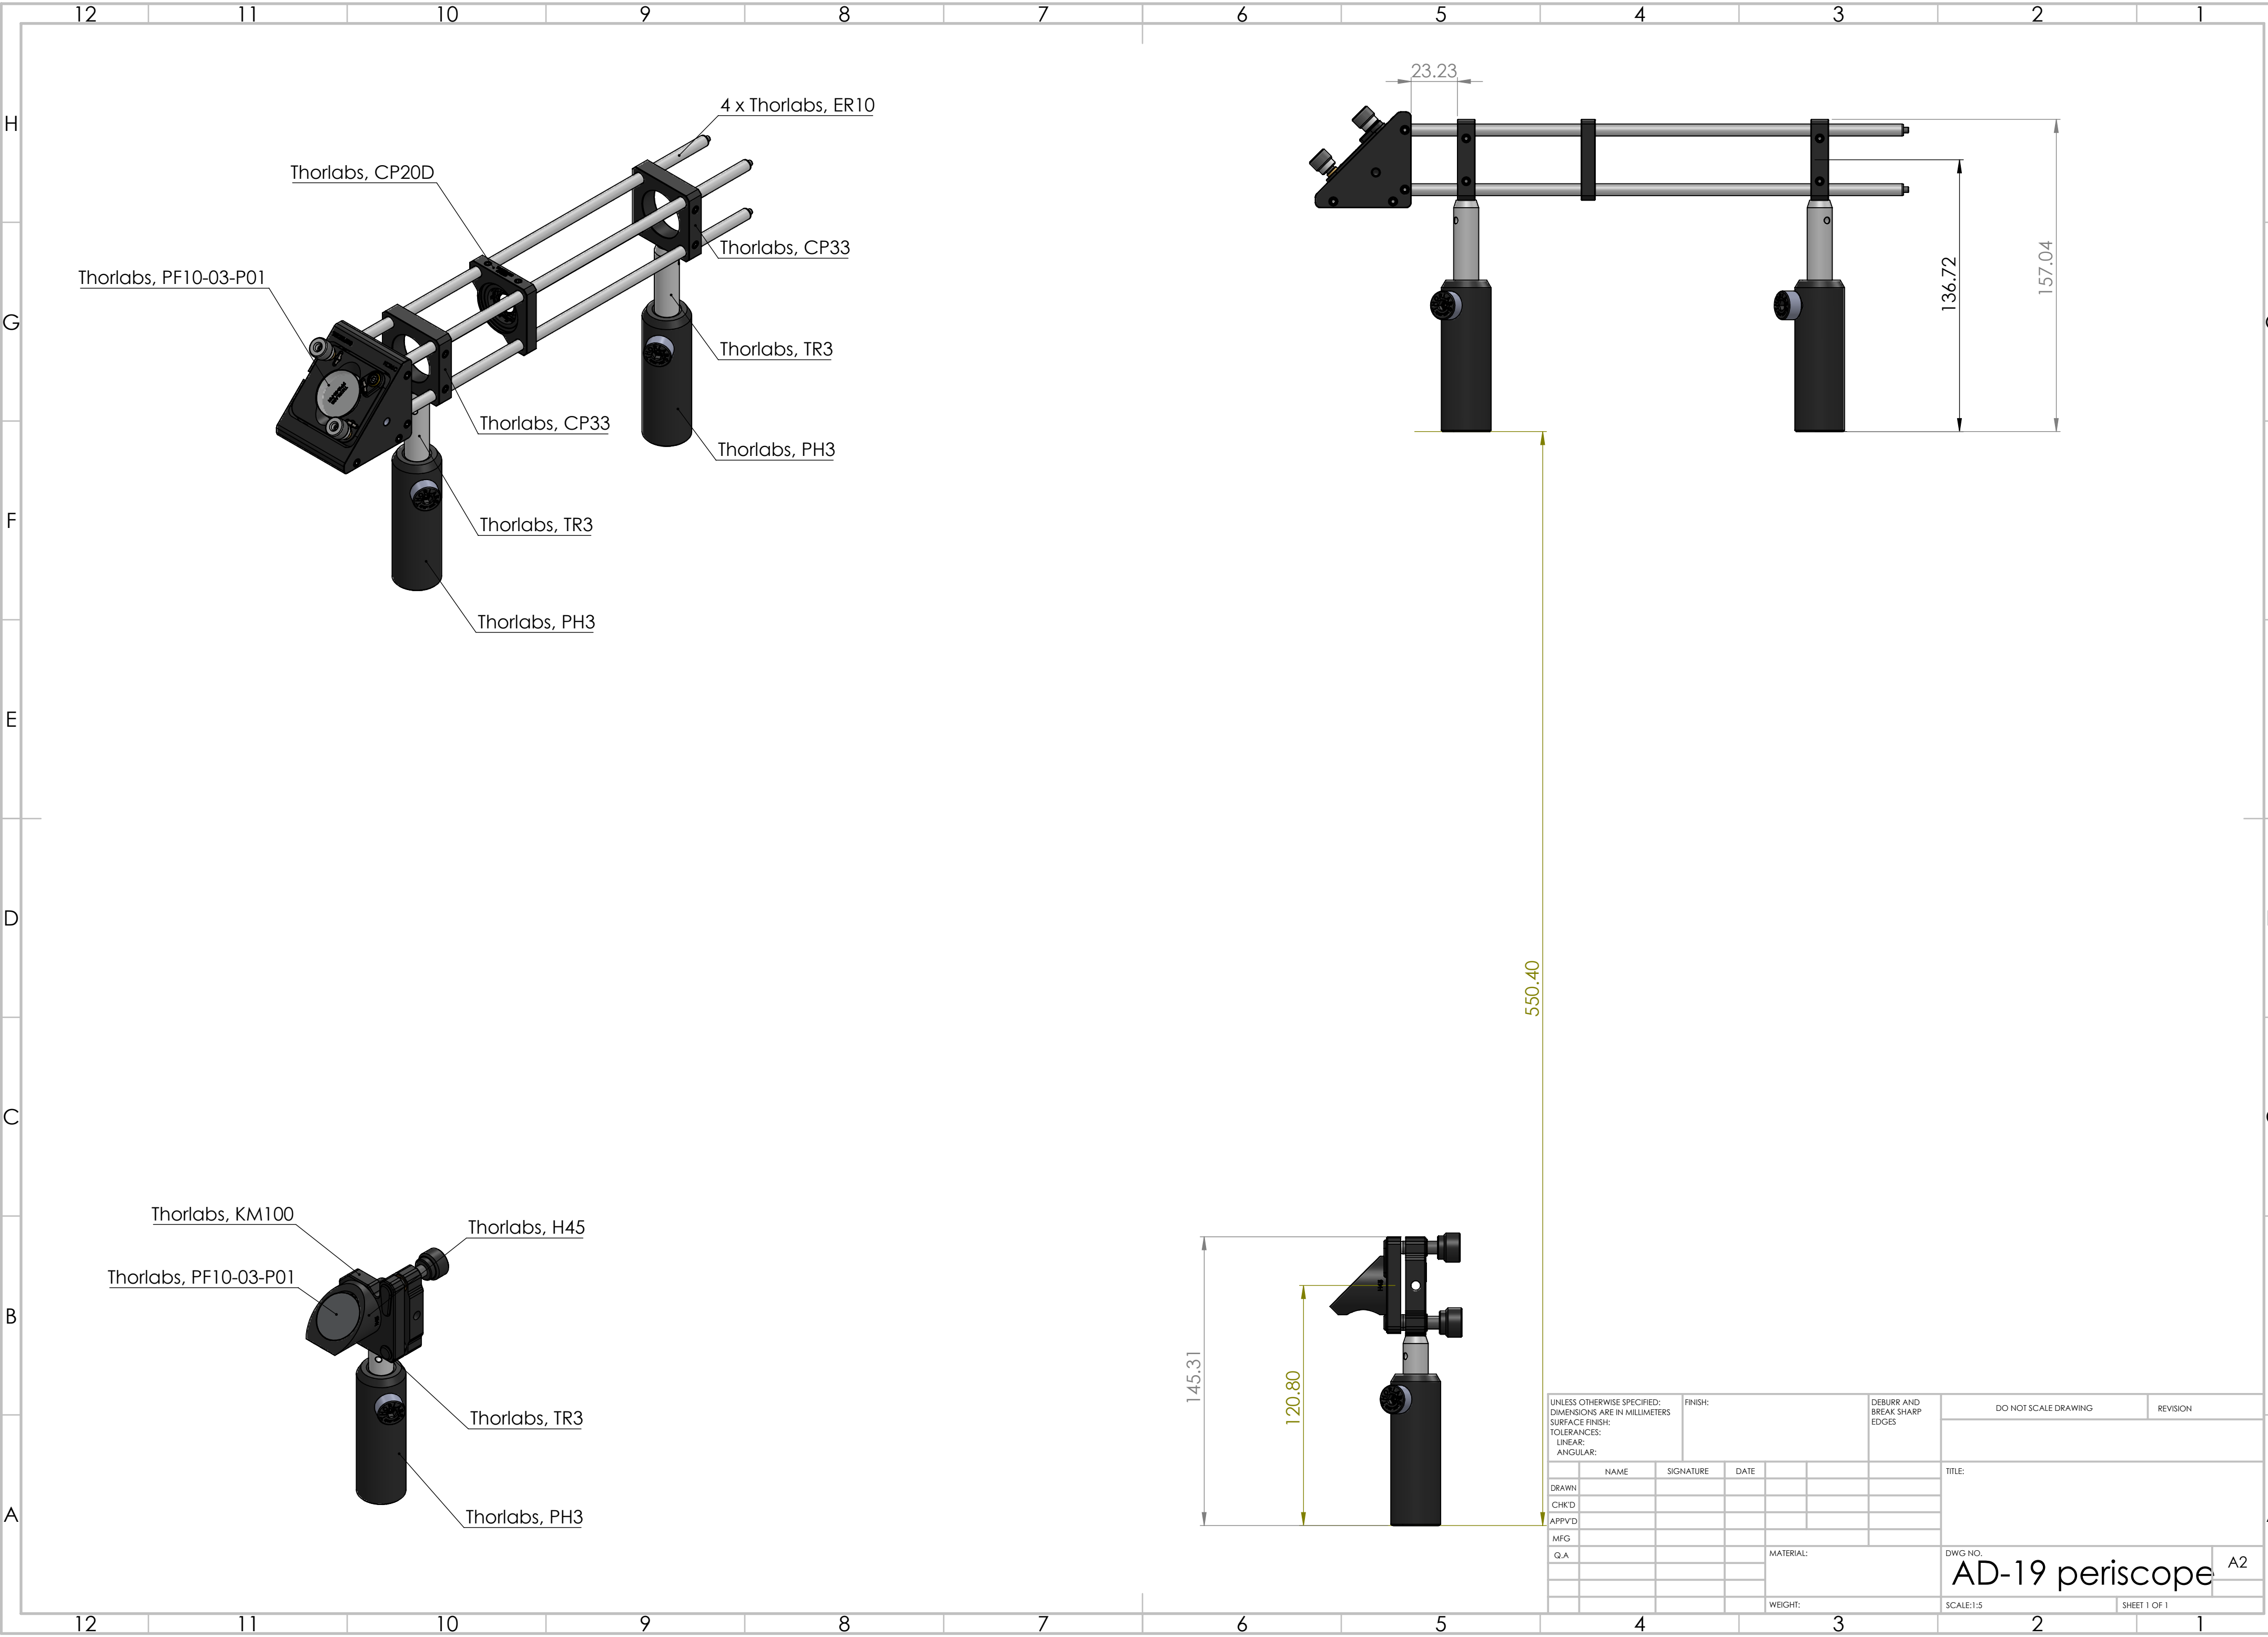

|                                                                                                                       |  |  |  |         |           |                                    |                                   |  |              |
|-----------------------------------------------------------------------------------------------------------------------|--|--|--|---------|-----------|------------------------------------|-----------------------------------|--|--------------|
| UNLESS OTHERWISE SPECIFIED:<br>DIMENSIONS ARE IN MILLIMETERS<br>SURFACE FINISH:<br>TOLERANCES:<br>LINEAR:<br>ANGULAR: |  |  |  | FINISH: |           | DEBURR AND<br>BREAK SHARP<br>EDGES | DO NOT SCALE DRAWING              |  | REVISION     |
| DRAWN                                                                                                                 |  |  |  | NAME    | SIGNATURE | DATE                               | TITLE:                            |  |              |
| CHK'D                                                                                                                 |  |  |  |         |           |                                    | DWG NO.<br><b>AD-19 periscope</b> |  |              |
| APPVD                                                                                                                 |  |  |  |         |           |                                    |                                   |  |              |
| MFG                                                                                                                   |  |  |  |         |           |                                    | MATERIAL:                         |  | A2           |
| Q.A                                                                                                                   |  |  |  |         |           |                                    |                                   |  |              |
|                                                                                                                       |  |  |  |         |           |                                    | WEIGHT:                           |  | SCALE:1:5    |
|                                                                                                                       |  |  |  |         |           |                                    |                                   |  | SHEET 1 OF 1 |
