# Supplementary material for: Construction and use of an adaptive optics two-photon microscope with direct wavefront sensing
Source: Springer Nature journal article supplement (doi:10.1038/s41596-023-00893-w), 2023-11-01
Supplement: MOESM1 [file 41596_2023_893_MOESM1_ESM.zip]

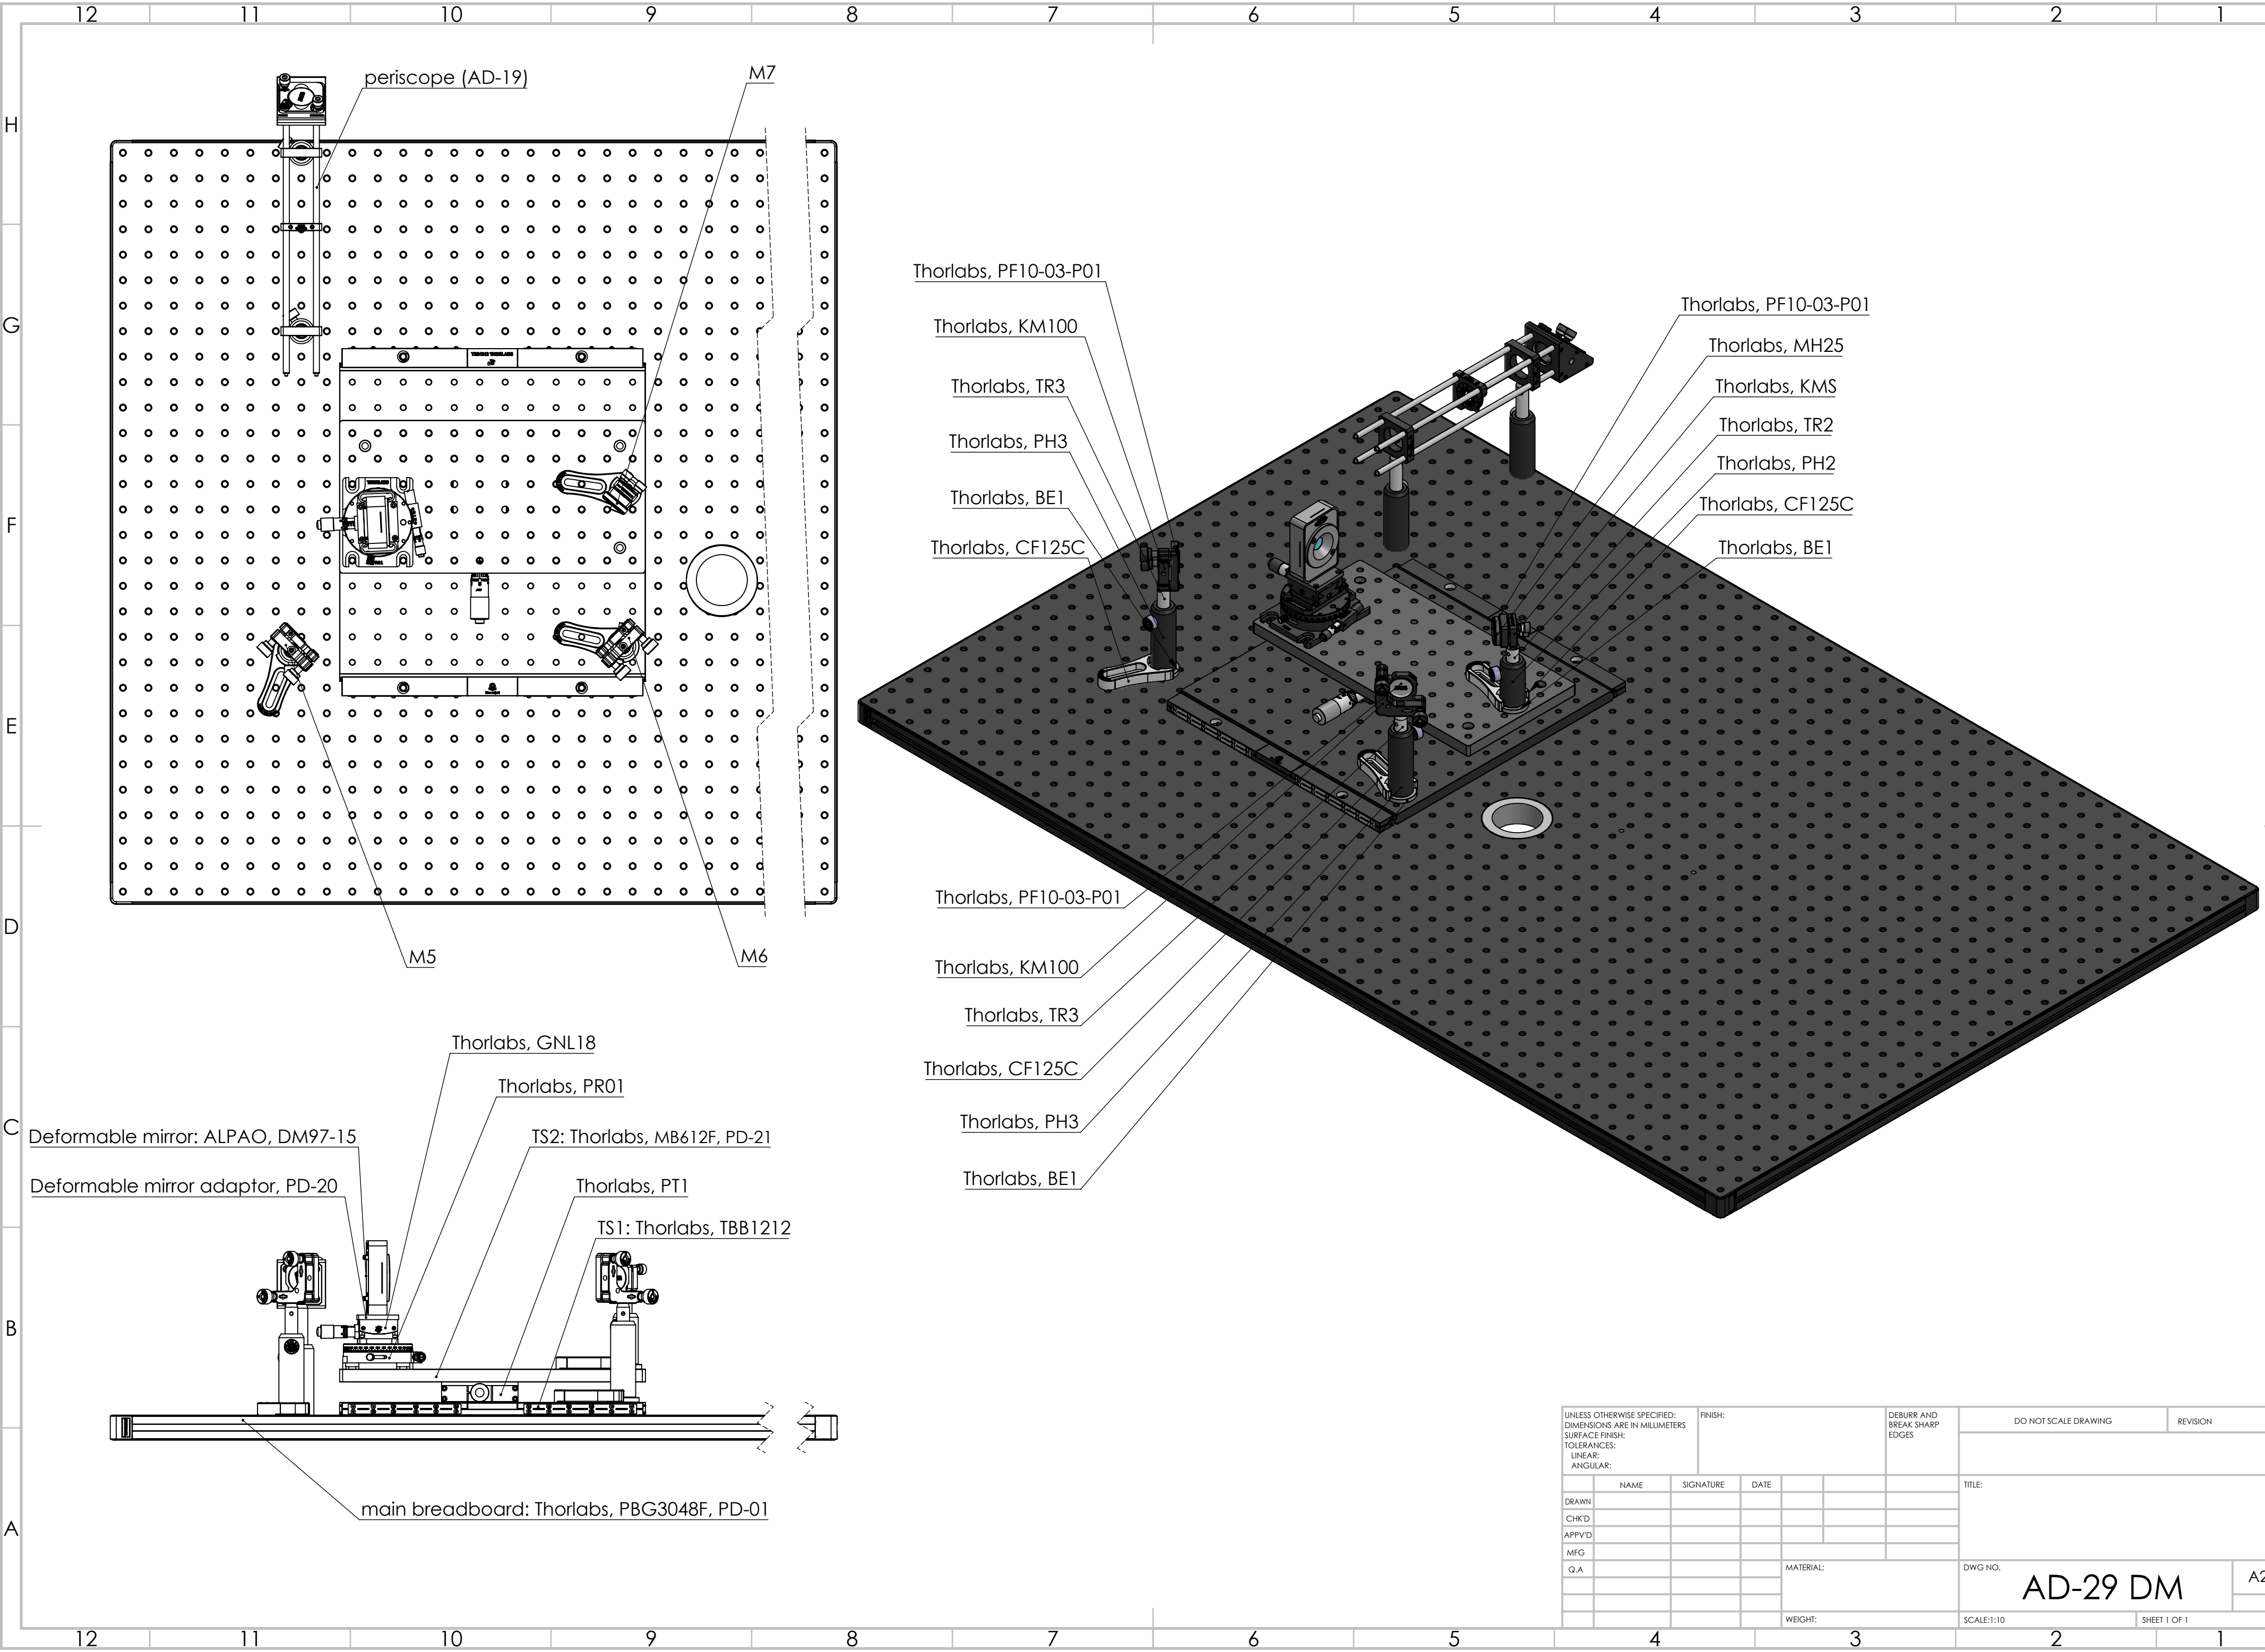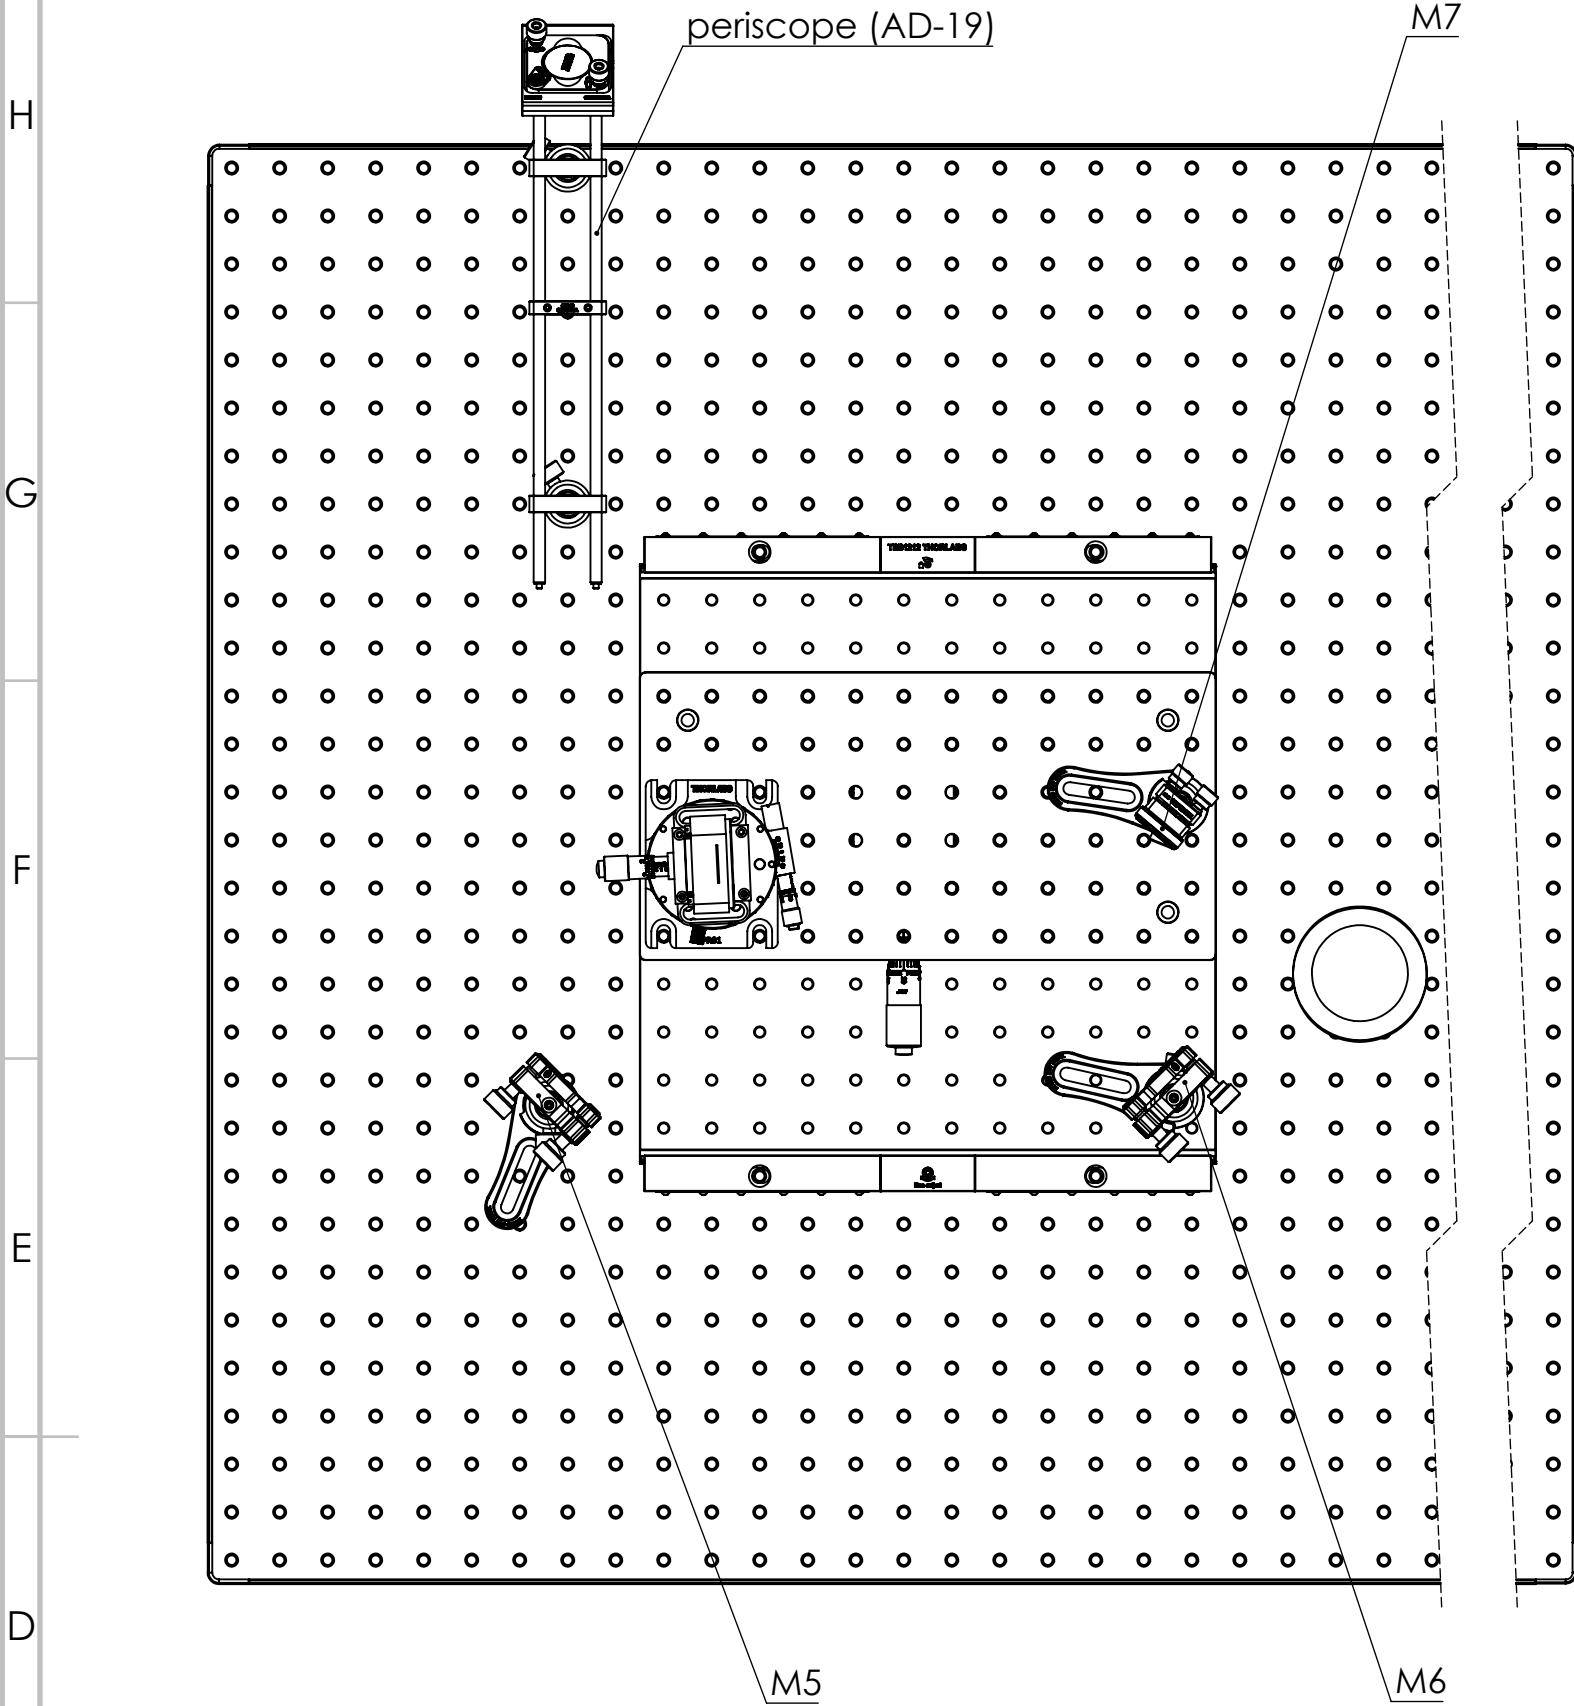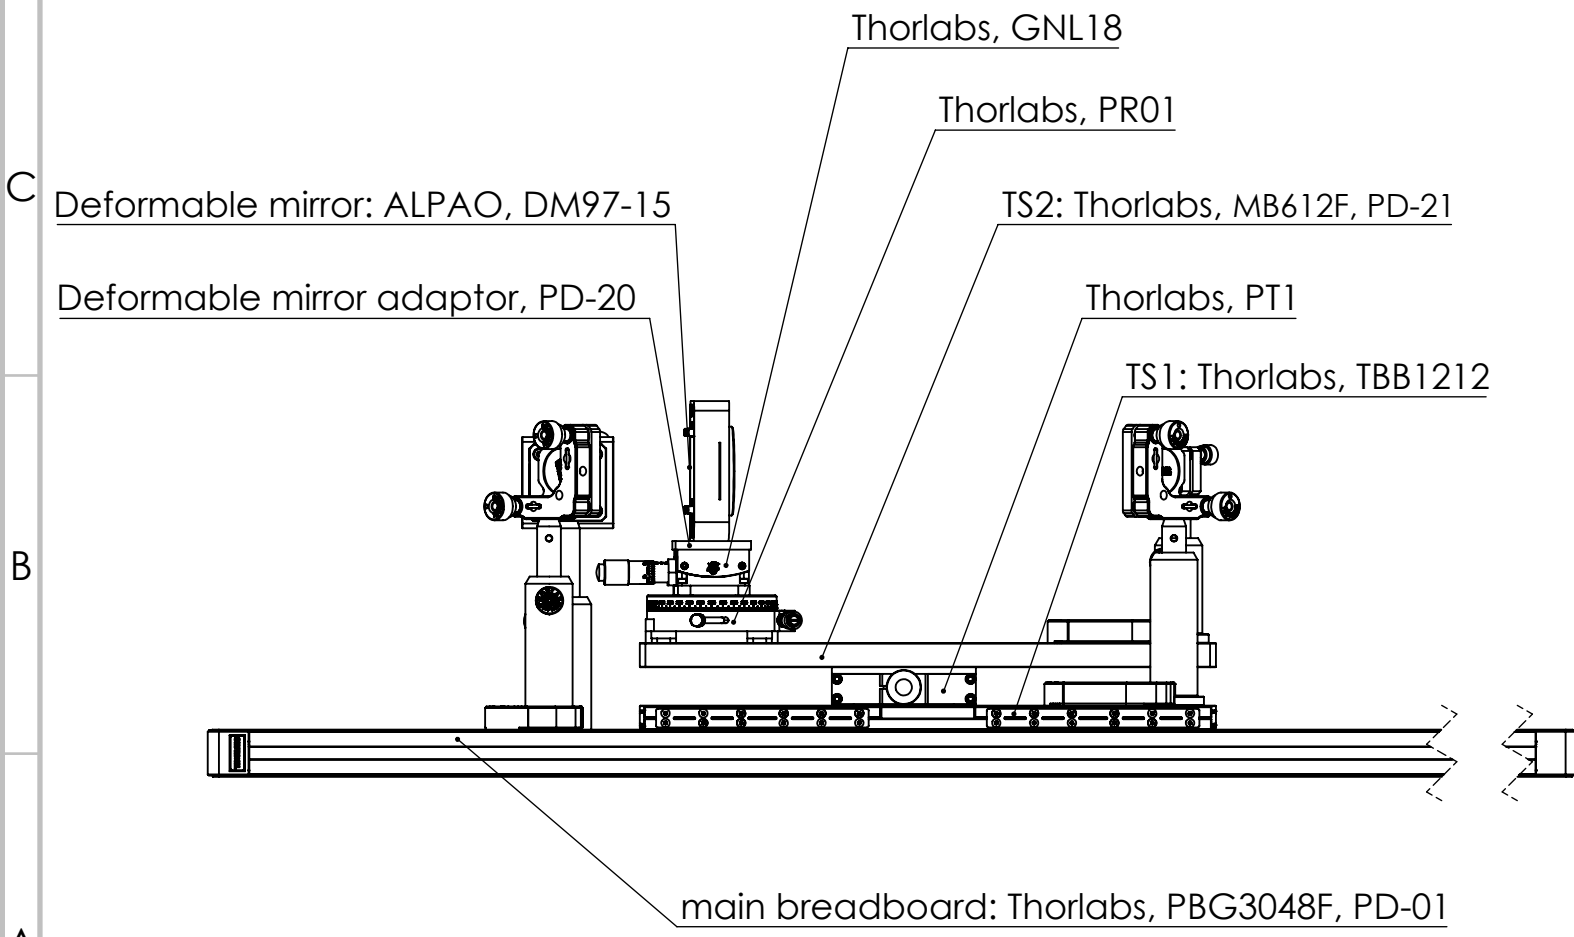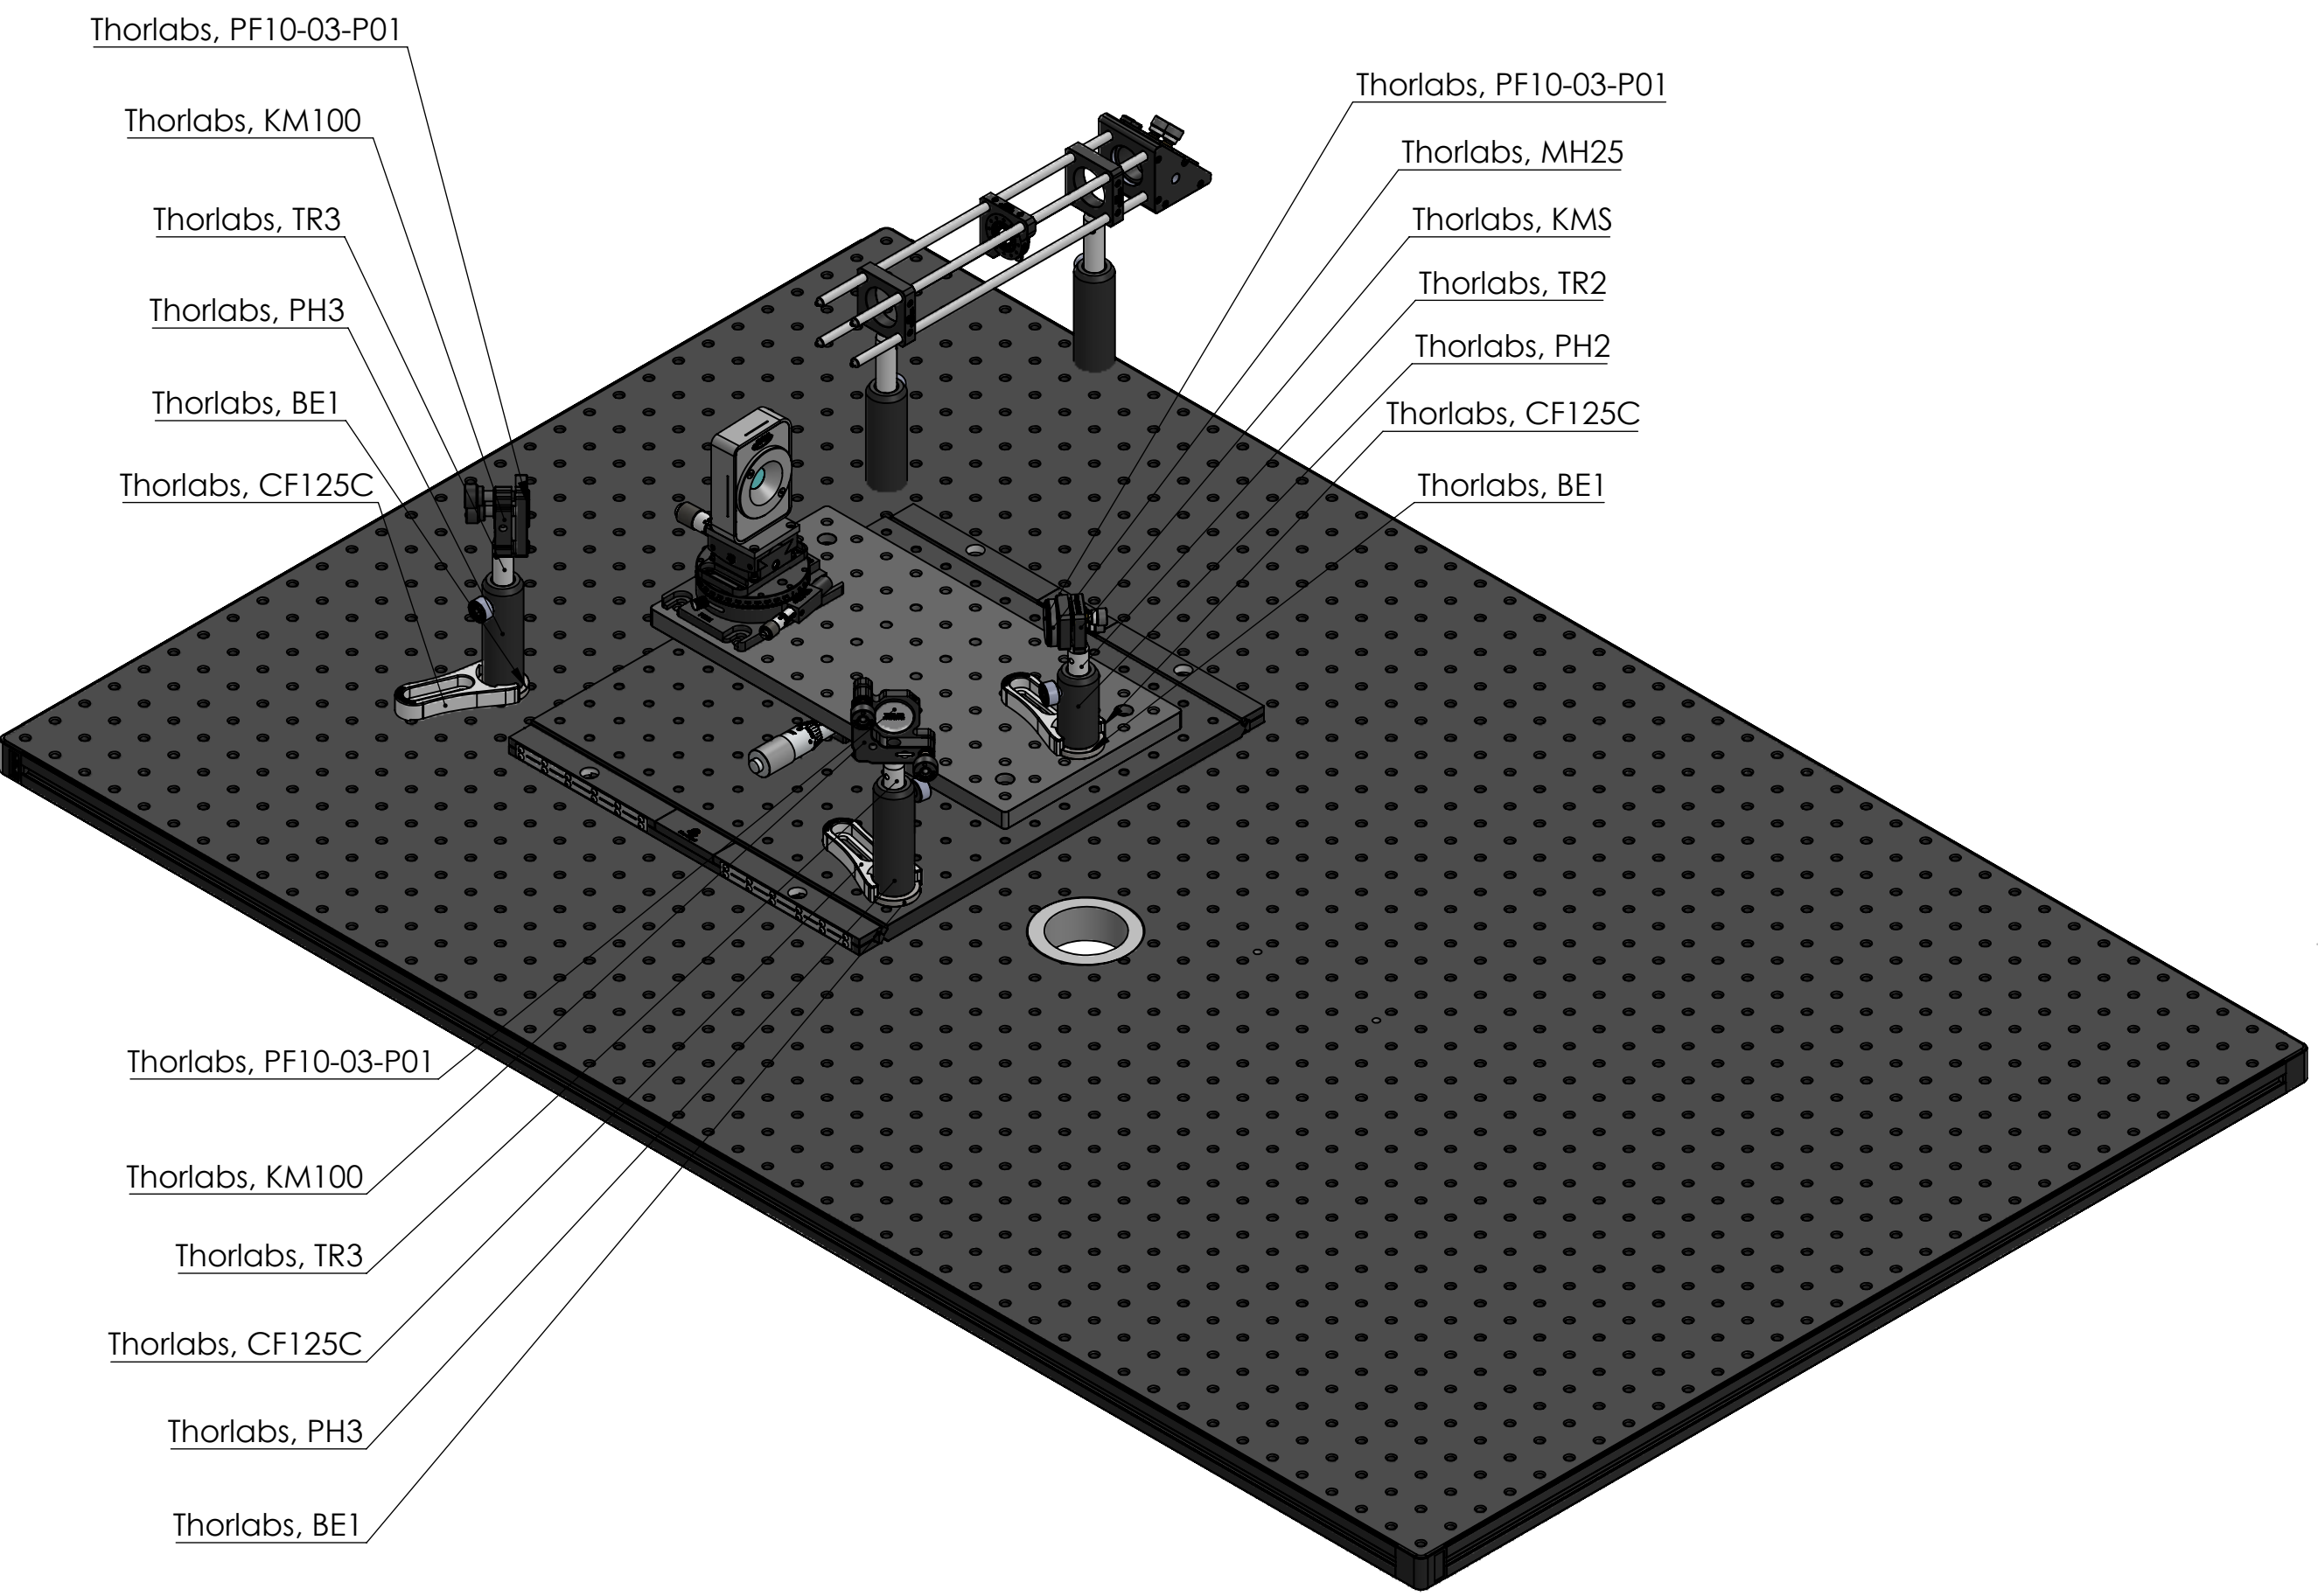

|                                                                                                                       |  |  |  |         |           |                                    |           |                      |              |          |
|-----------------------------------------------------------------------------------------------------------------------|--|--|--|---------|-----------|------------------------------------|-----------|----------------------|--------------|----------|
| UNLESS OTHERWISE SPECIFIED:<br>DIMENSIONS ARE IN MILLIMETERS<br>SURFACE FINISH:<br>TOLERANCES:<br>LINEAR:<br>ANGULAR: |  |  |  | FINISH: |           | DEBURR AND<br>BREAK SHARP<br>EDGES |           | DO NOT SCALE DRAWING |              | REVISION |
|                                                                                                                       |  |  |  | NAME    | SIGNATURE | DATE                               |           |                      | TITLE:       |          |
| DRAWN                                                                                                                 |  |  |  |         |           |                                    |           |                      |              |          |
| CHK'D                                                                                                                 |  |  |  |         |           |                                    |           |                      |              |          |
| APP'VD                                                                                                                |  |  |  |         |           |                                    |           |                      |              |          |
| MFG                                                                                                                   |  |  |  |         |           |                                    |           |                      |              |          |
| Q.A.                                                                                                                  |  |  |  |         |           |                                    | MATERIAL: |                      | DWG NO.      |          |
|                                                                                                                       |  |  |  |         |           |                                    | WEIGHT:   |                      | SCALE:1:10   |          |
|                                                                                                                       |  |  |  |         |           |                                    |           |                      | SHEET 1 OF 1 |          |

AD-29 DM

A2
