# Supplementary material for: Construction and use of an adaptive optics two-photon microscope with direct wavefront sensing
Source: Springer Nature journal article supplement (doi:10.1038/s41596-023-00893-w), 2023-11-01
Supplement: MOESM1 [file 41596_2023_893_MOESM1_ESM.zip]

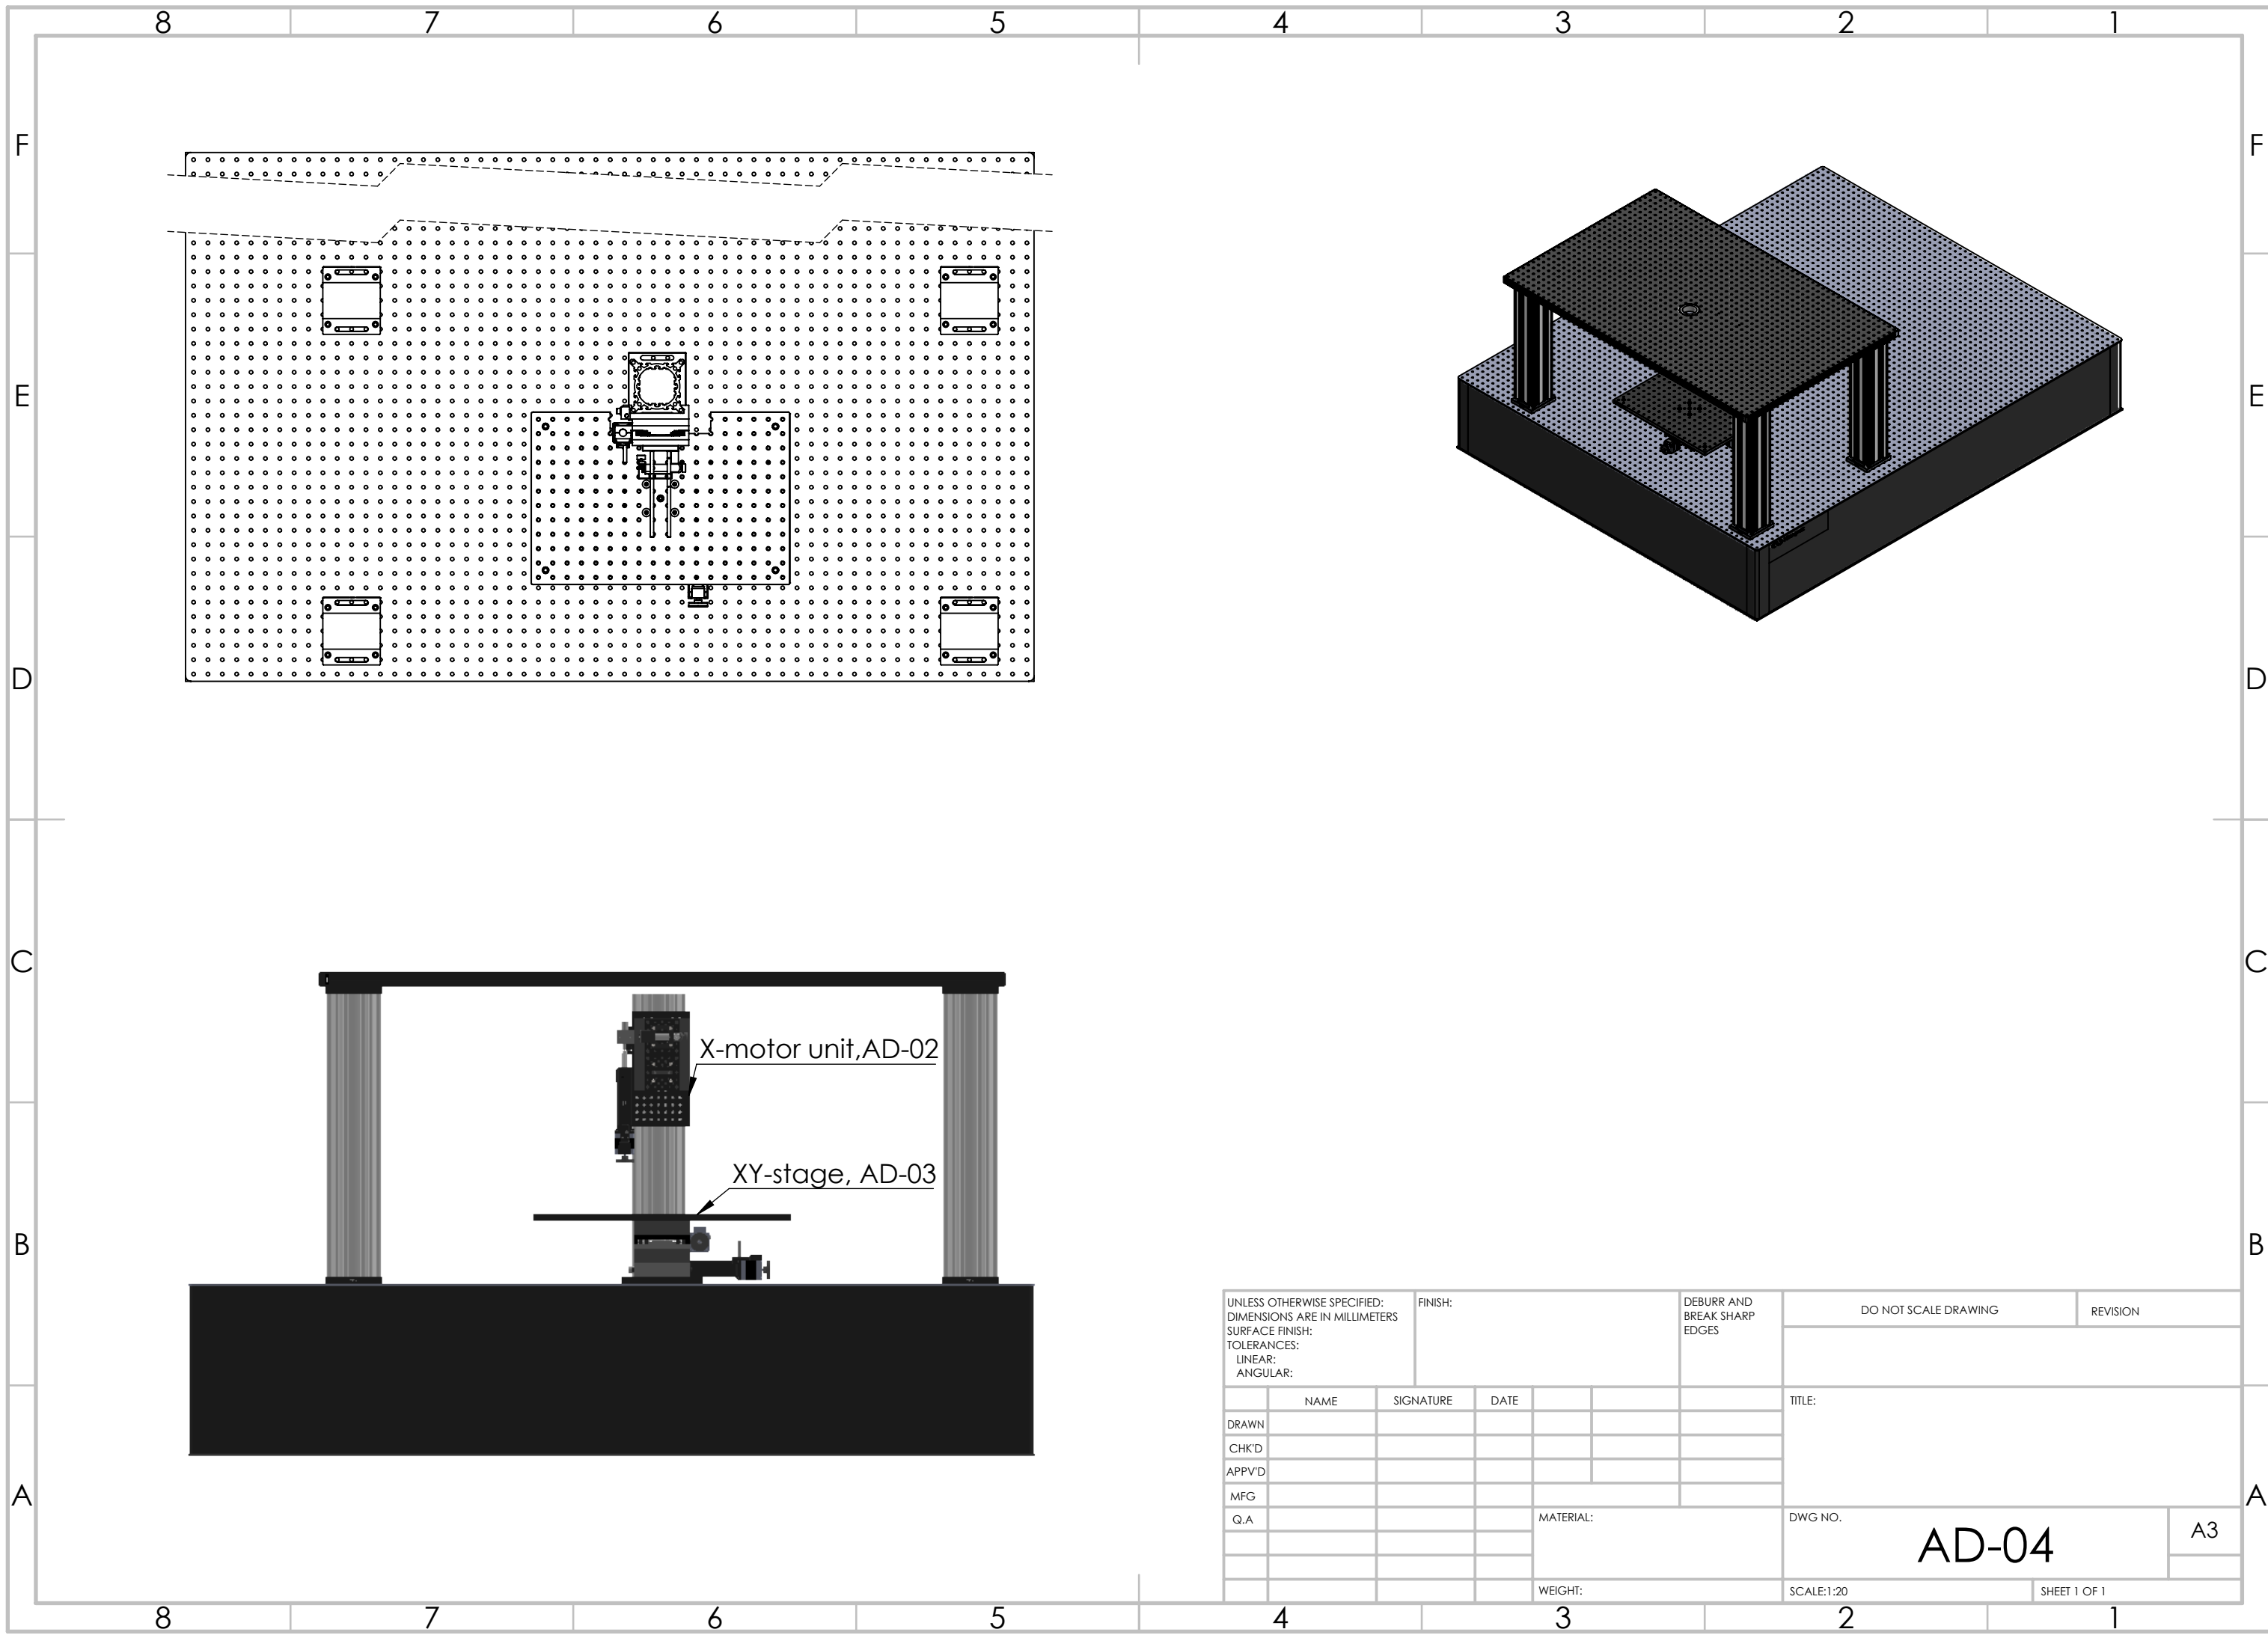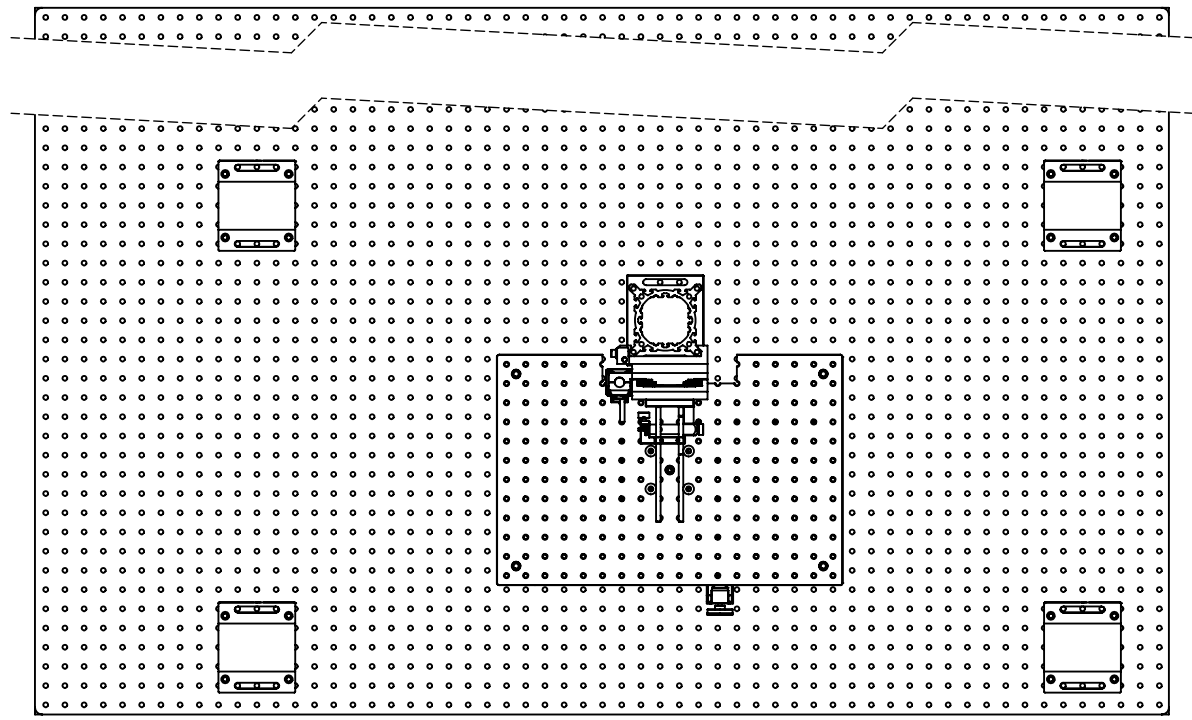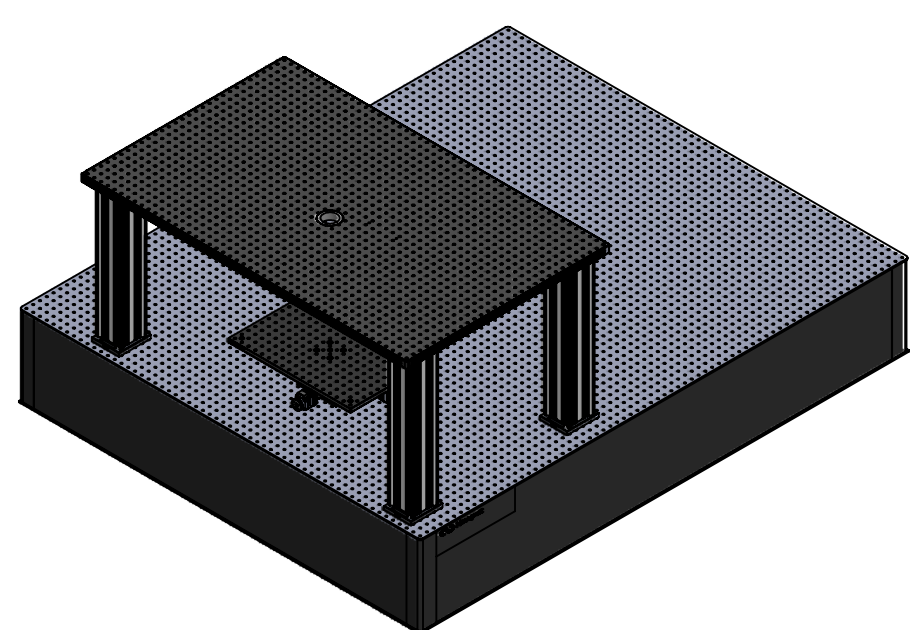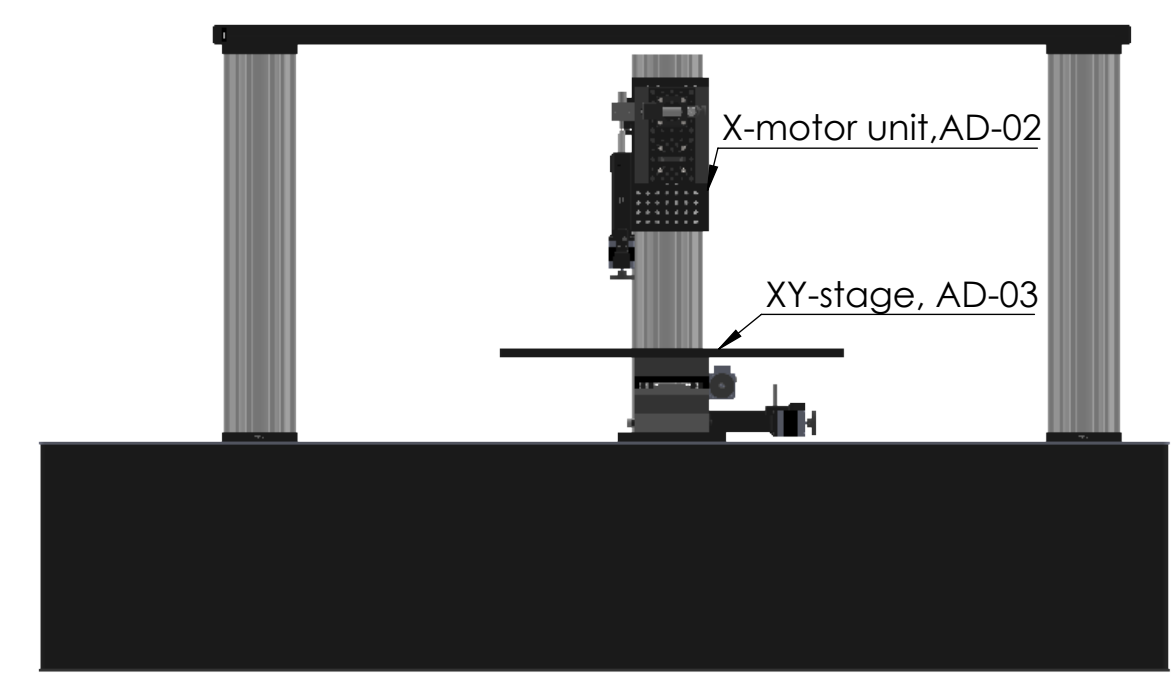

|                                                                                                                       |      |  |           |         |      |                                    |           |                      |            |          |              |  |    |  |
|-----------------------------------------------------------------------------------------------------------------------|------|--|-----------|---------|------|------------------------------------|-----------|----------------------|------------|----------|--------------|--|----|--|
| UNLESS OTHERWISE SPECIFIED:<br>DIMENSIONS ARE IN MILLIMETERS<br>SURFACE FINISH:<br>TOLERANCES:<br>LINEAR:<br>ANGULAR: |      |  |           | FINISH: |      | DEBURR AND<br>BREAK SHARP<br>EDGES |           | DO NOT SCALE DRAWING |            | REVISION |              |  |    |  |
|                                                                                                                       |      |  |           |         |      |                                    |           |                      |            |          |              |  |    |  |
|                                                                                                                       | NAME |  | SIGNATURE |         | DATE |                                    |           |                      | TITLE:     |          |              |  |    |  |
| DRAWN                                                                                                                 |      |  |           |         |      |                                    |           |                      |            |          |              |  |    |  |
| CHK'D                                                                                                                 |      |  |           |         |      |                                    |           |                      |            |          |              |  |    |  |
| APPV'D                                                                                                                |      |  |           |         |      |                                    |           |                      |            |          |              |  |    |  |
| MFG                                                                                                                   |      |  |           |         |      |                                    |           |                      |            |          |              |  |    |  |
| Q.A                                                                                                                   |      |  |           |         |      |                                    |           |                      |            |          |              |  |    |  |
|                                                                                                                       |      |  |           |         |      |                                    | MATERIAL: |                      | DWG NO.    |          | AD-04        |  | A3 |  |
|                                                                                                                       |      |  |           |         |      |                                    |           |                      |            |          |              |  |    |  |
|                                                                                                                       |      |  |           |         |      |                                    |           |                      |            |          |              |  |    |  |
|                                                                                                                       |      |  |           |         |      |                                    | WEIGHT:   |                      | SCALE:1:20 |          | SHEET 1 OF 1 |  |    |  |
