# Supplementary material for: Construction and use of an adaptive optics two-photon microscope with direct wavefront sensing
Source: Springer Nature journal article supplement (doi:10.1038/s41596-023-00893-w), 2023-11-01
Supplement: MOESM1 [file 41596_2023_893_MOESM1_ESM.zip]

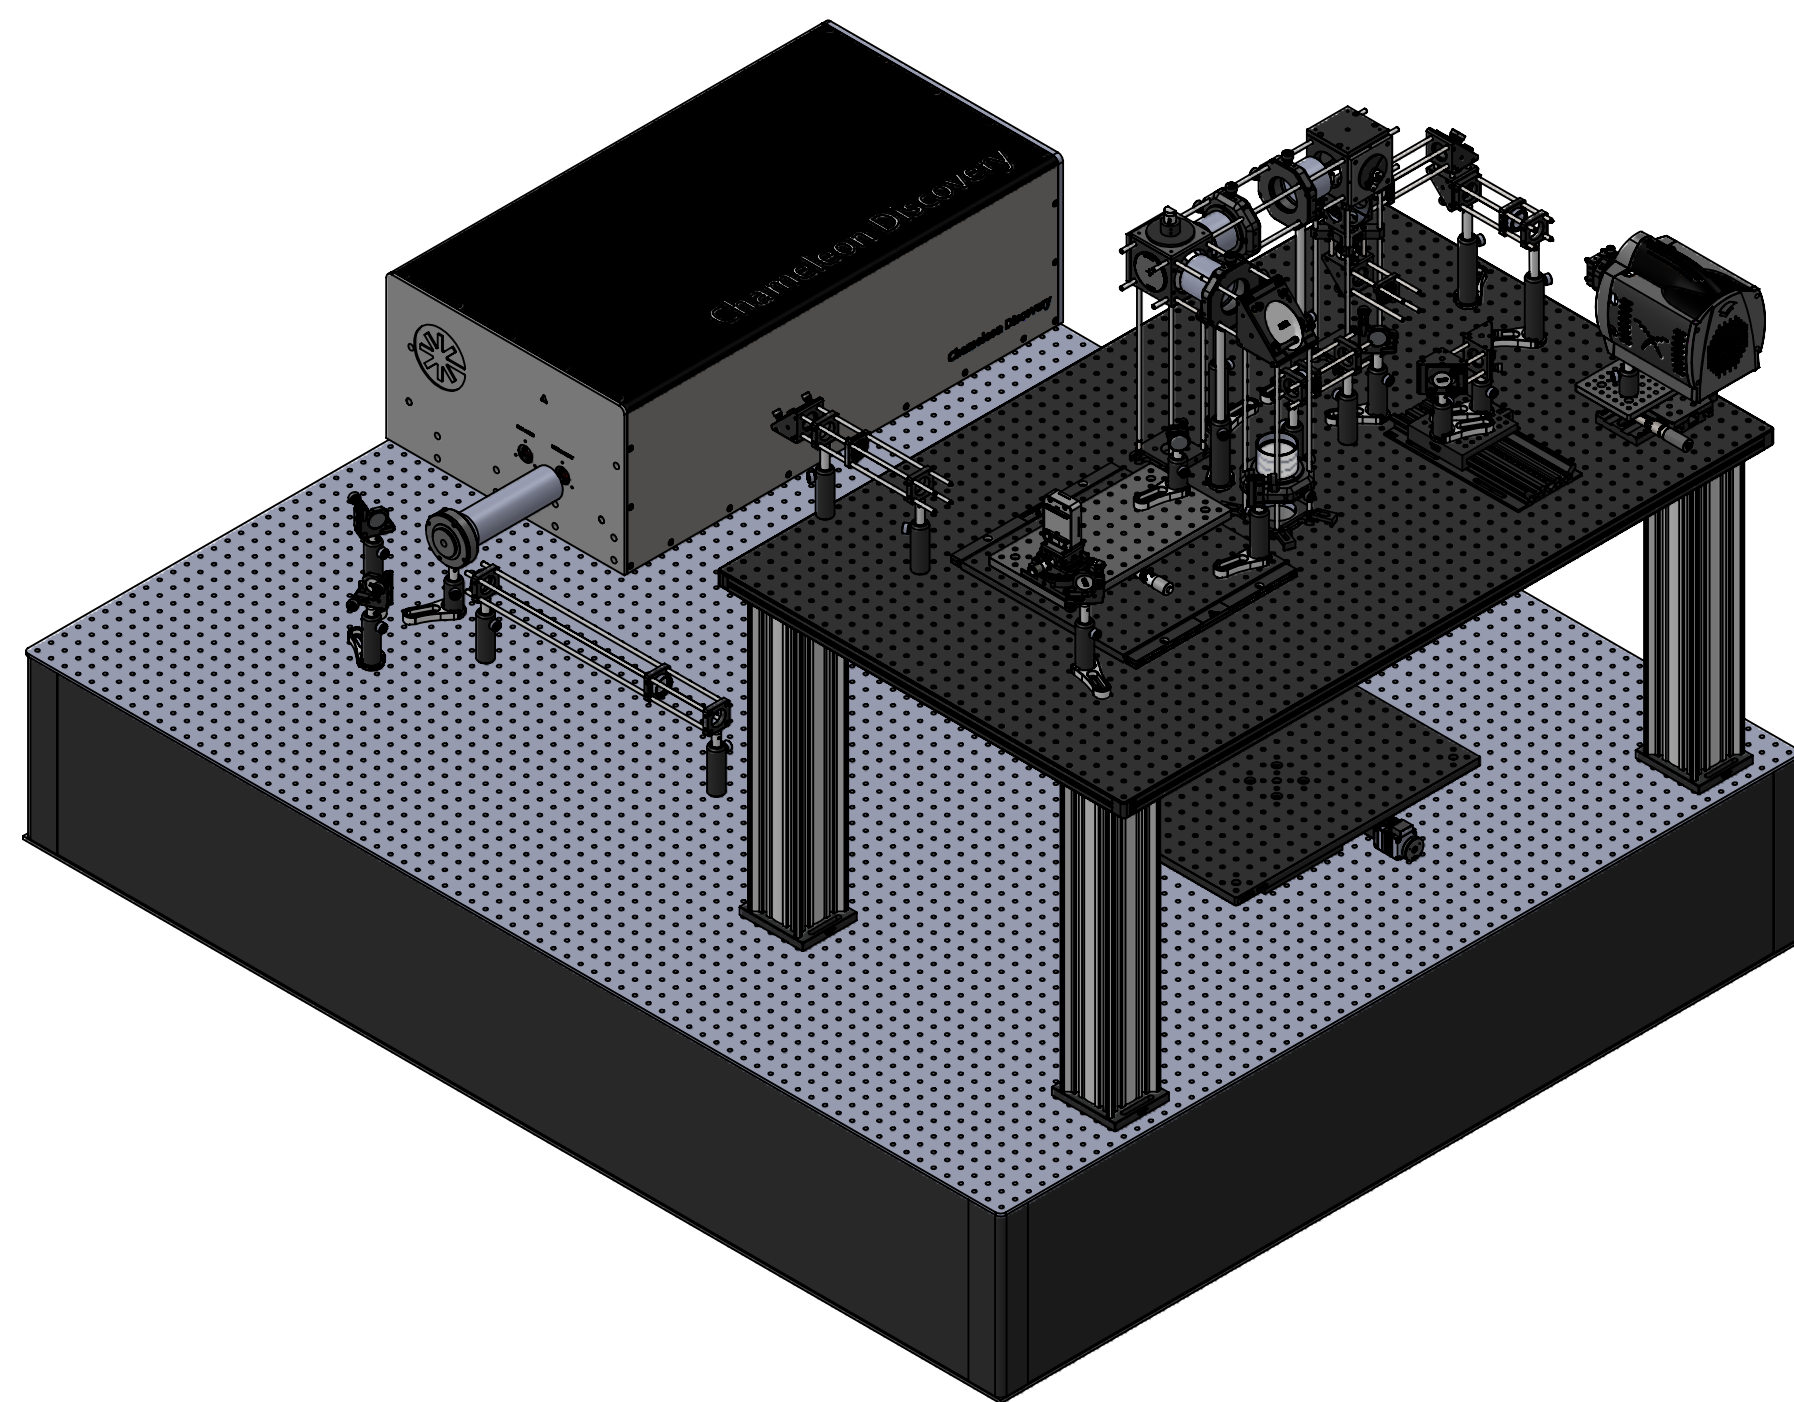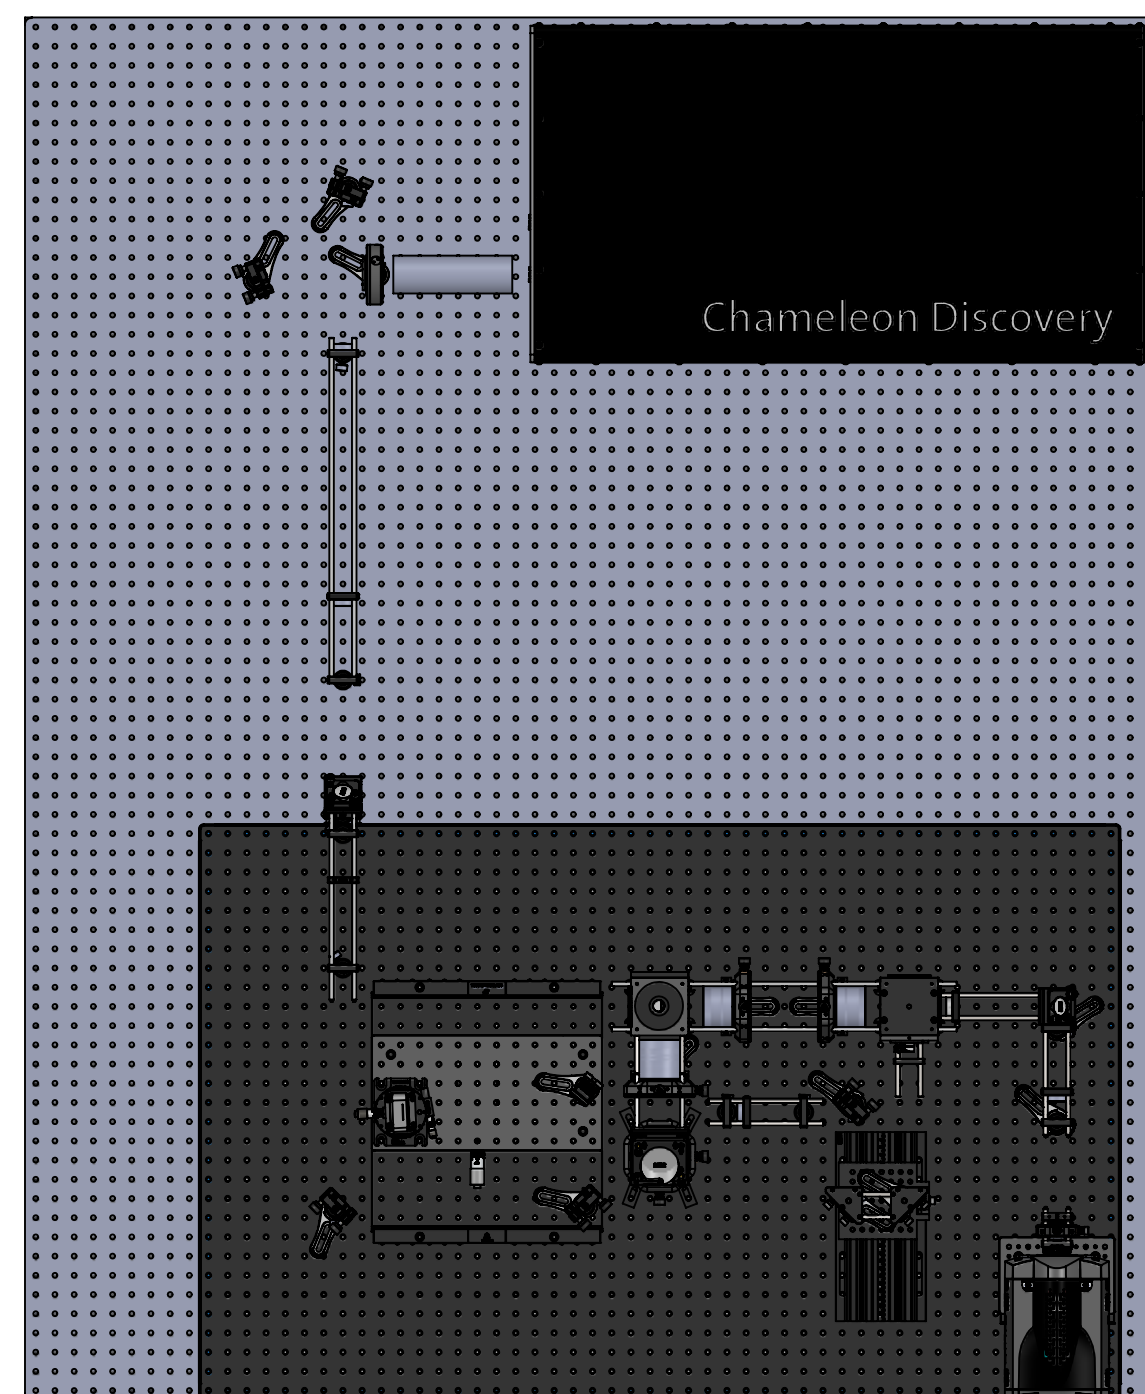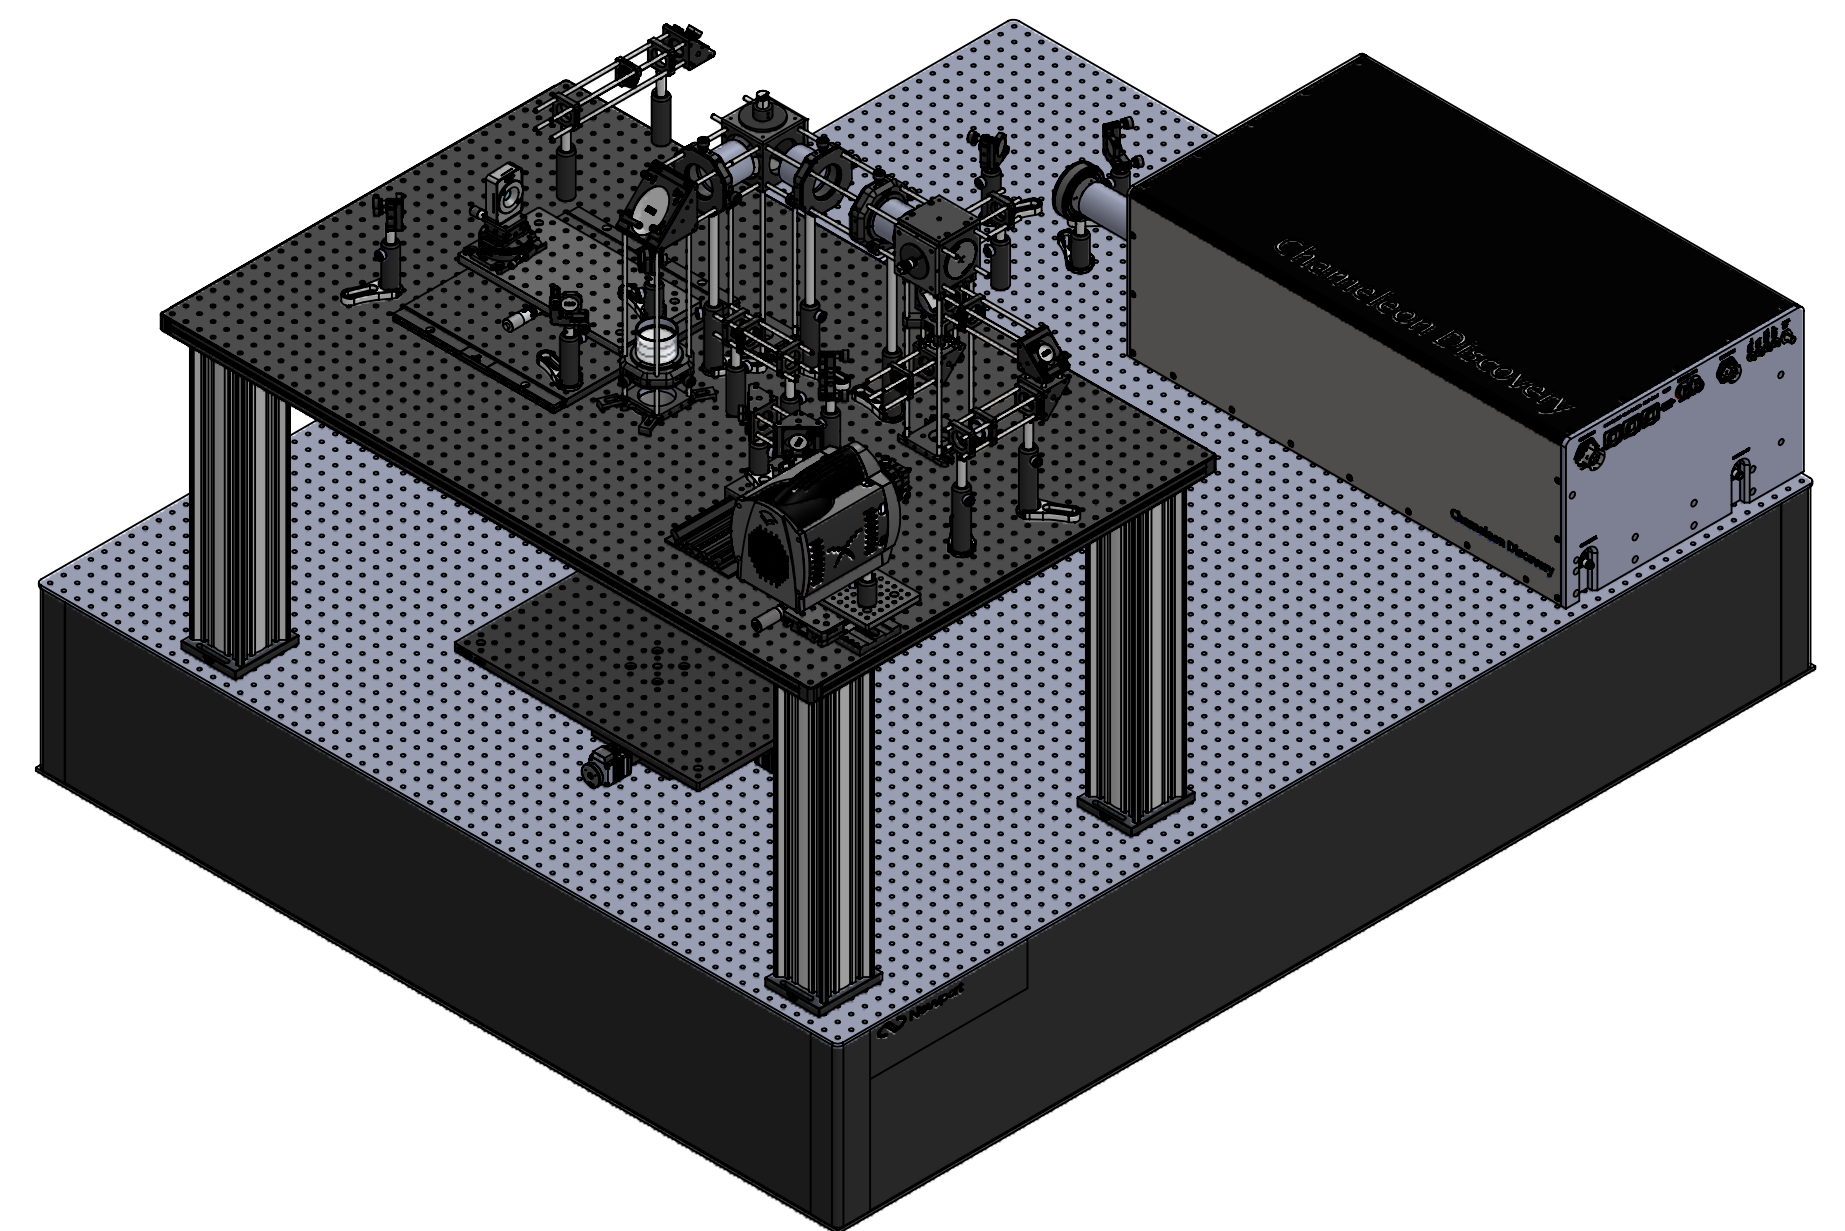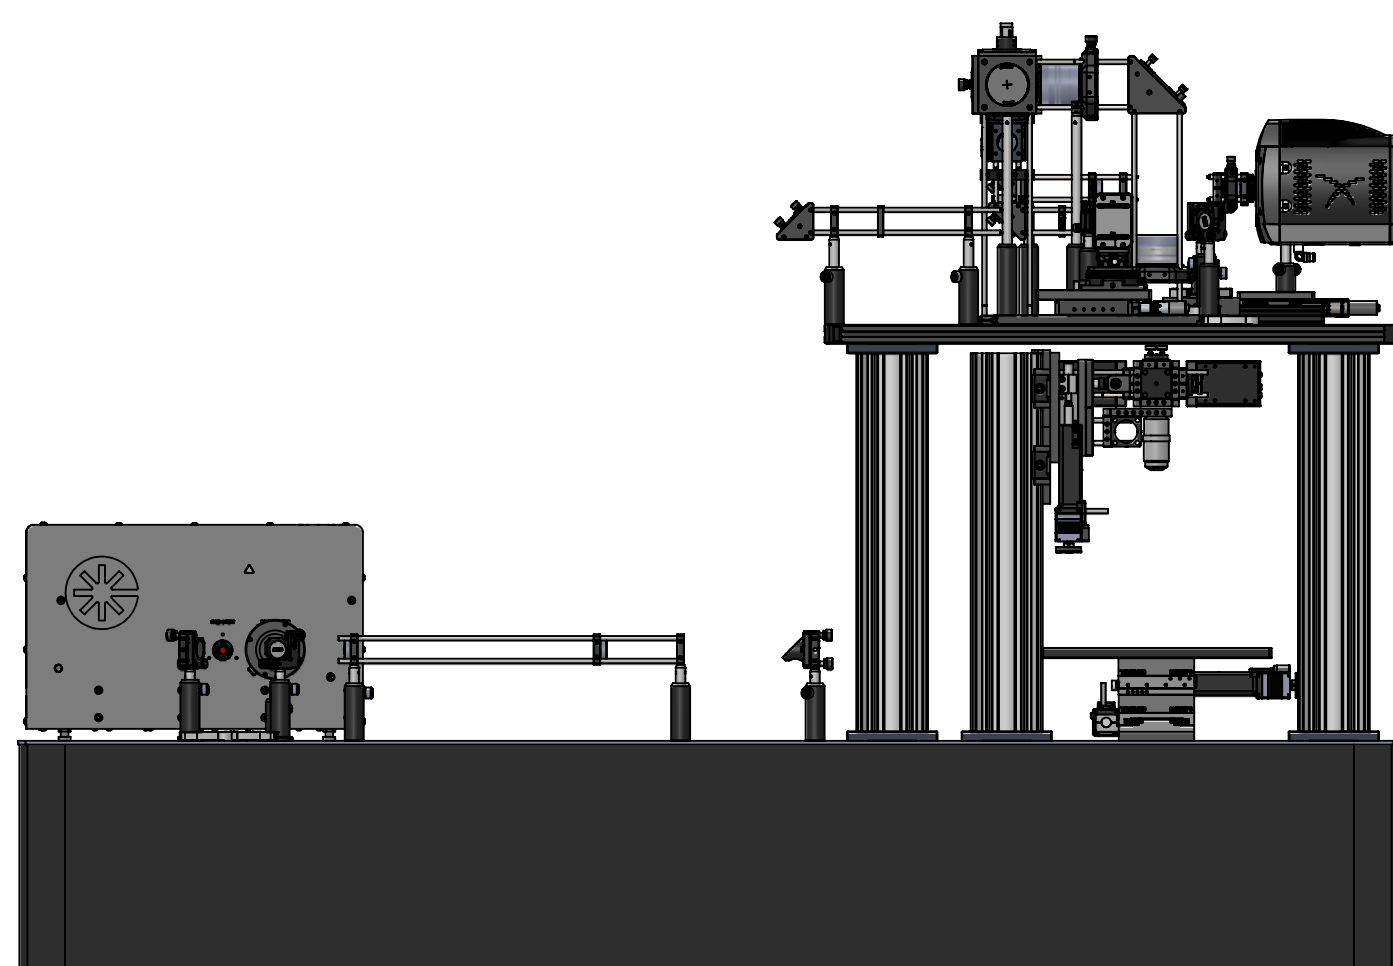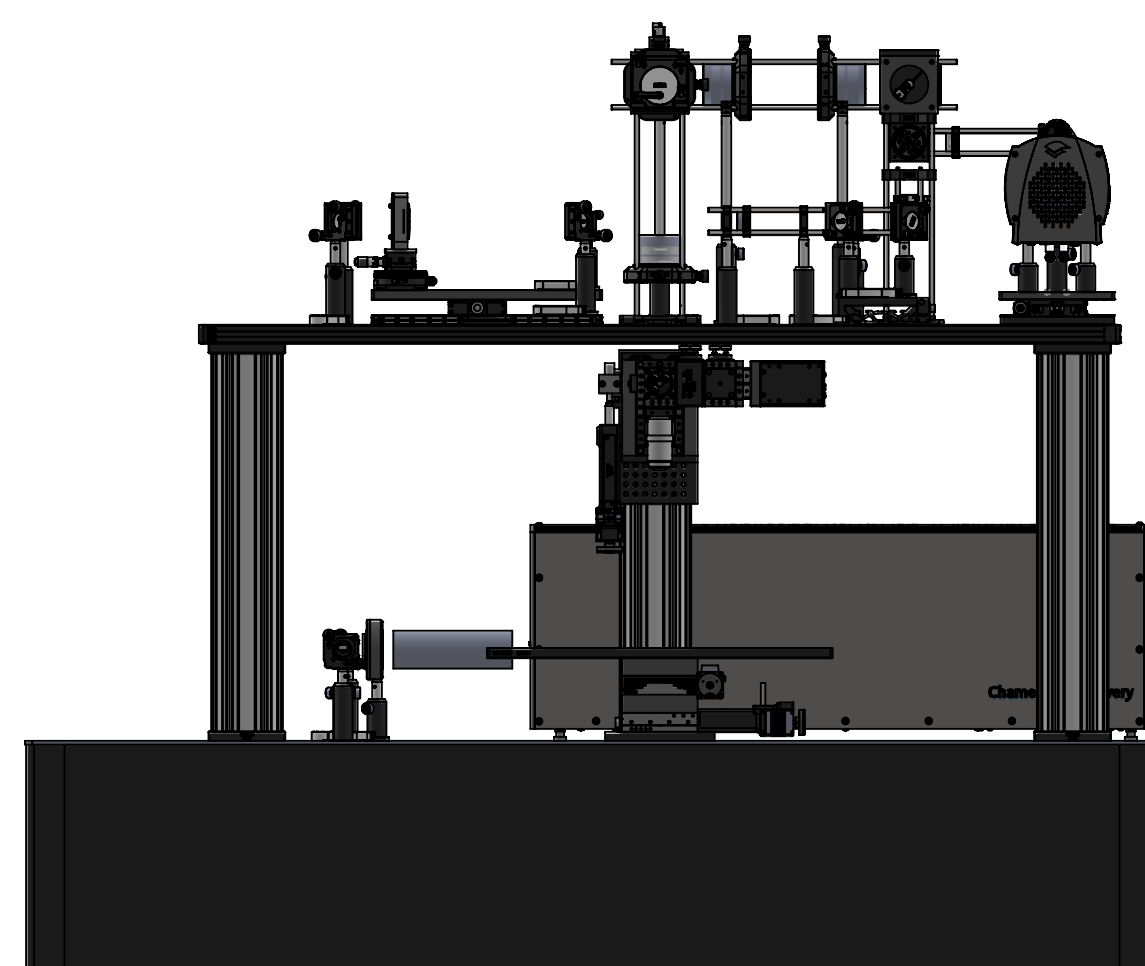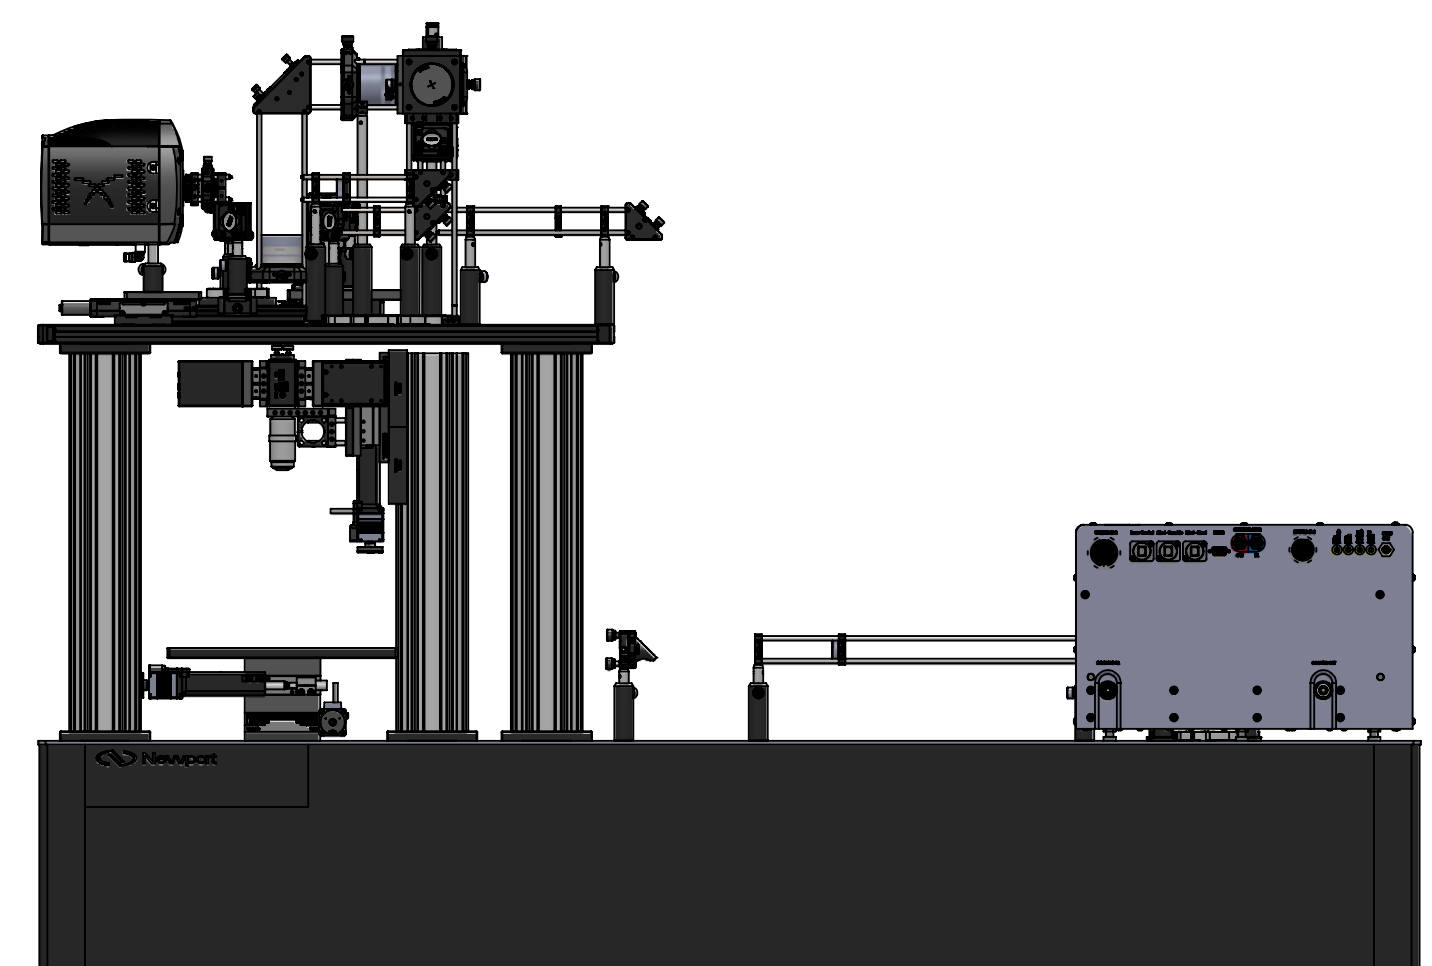

|                                                                                                                       |      |           |      |  |  |           |  |                              |  |                                              |  |              |  |
|-----------------------------------------------------------------------------------------------------------------------|------|-----------|------|--|--|-----------|--|------------------------------|--|----------------------------------------------|--|--------------|--|
| UNLESS OTHERWISE SPECIFIED:<br>DIMENSIONS ARE IN MILLIMETERS<br>SURFACE FINISH:<br>TOLERANCES:<br>LINEAR:<br>ANGULAR: |      |           |      |  |  | FINISH:   |  | DEBURR AND BREAK SHARP EDGES |  | DO NOT SCALE DRAWING                         |  | REVISION     |  |
|                                                                                                                       | NAME | SIGNATURE | DATE |  |  |           |  |                              |  | TITLE:                                       |  |              |  |
| DRAWN                                                                                                                 |      |           |      |  |  |           |  |                              |  | DWG NO.<br><b>AD-00 2pAO_v2</b><br><b>A1</b> |  |              |  |
| CHECKD                                                                                                                |      |           |      |  |  |           |  |                              |  |                                              |  |              |  |
| APP'D                                                                                                                 |      |           |      |  |  |           |  |                              |  |                                              |  |              |  |
| MFG                                                                                                                   |      |           |      |  |  |           |  |                              |  |                                              |  |              |  |
| Q.A.                                                                                                                  |      |           |      |  |  |           |  |                              |  |                                              |  |              |  |
|                                                                                                                       |      |           |      |  |  |           |  |                              |  |                                              |  |              |  |
|                                                                                                                       |      |           |      |  |  |           |  |                              |  |                                              |  |              |  |
|                                                                                                                       |      |           |      |  |  | MATERIAL: |  |                              |  |                                              |  |              |  |
|                                                                                                                       |      |           |      |  |  | WEIGHT:   |  |                              |  | SCALE:1-10                                   |  | SHEET 1 OF 1 |  |
