# Supplementary material for: Construction and use of an adaptive optics two-photon microscope with direct wavefront sensing
Source: Springer Nature journal article supplement (doi:10.1038/s41596-023-00893-w), 2023-11-01
Supplement: MOESM1 [file 41596_2023_893_MOESM1_ESM.zip]

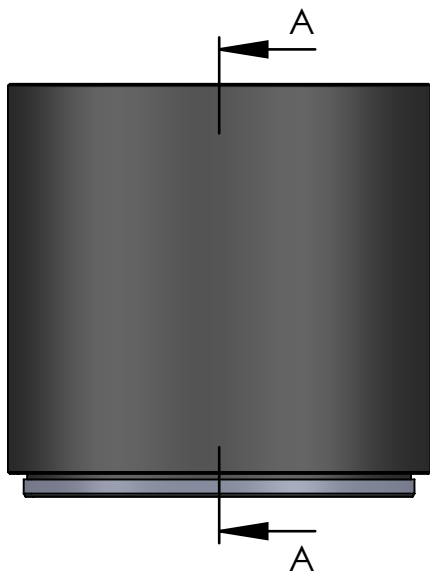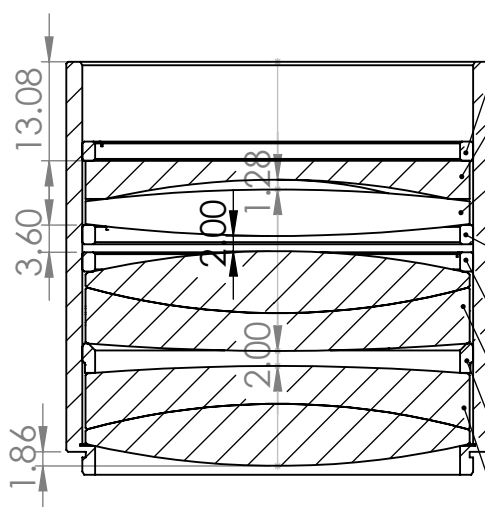

- Thorlabs, SM2RR
- Newport, KPC070AR.16
- Thorlabs, LB1199-B
- Thorlabs, SM2RR
- Thorlabs, SM2RR
- Thorlabs, AC508-150-B
- Thorlabs, SM2RRC, PD-08
- Thorlabs, AC508-150-B

SECTION A-A  
SCALE 1 : 1

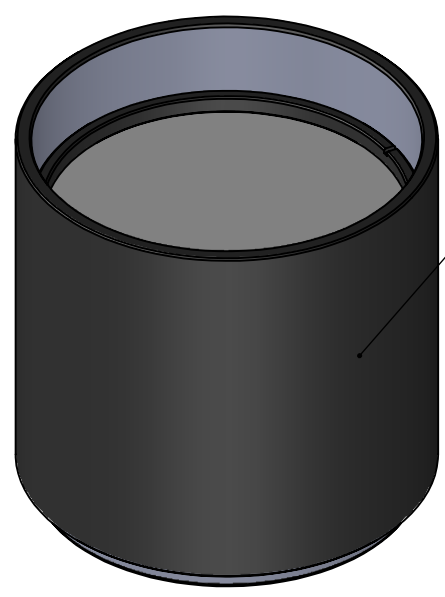

Thorlabs, SM2L20

|                                                                                                                       |  |  |  |           |  |                                    |  |                      |  |          |  |
|-----------------------------------------------------------------------------------------------------------------------|--|--|--|-----------|--|------------------------------------|--|----------------------|--|----------|--|
| UNLESS OTHERWISE SPECIFIED:<br>DIMENSIONS ARE IN MILLIMETERS<br>SURFACE FINISH:<br>TOLERANCES:<br>LINEAR:<br>ANGULAR: |  |  |  | FINISH:   |  | DEBURR AND<br>BREAK SHARP<br>EDGES |  | DO NOT SCALE DRAWING |  | REVISION |  |
| DRAWN                                                                                                                 |  |  |  | SIGNATURE |  | DATE                               |  | TITLE:               |  |          |  |
| CHK'D                                                                                                                 |  |  |  |           |  |                                    |  |                      |  |          |  |
| APPV'D                                                                                                                |  |  |  |           |  |                                    |  |                      |  |          |  |
| MFG                                                                                                                   |  |  |  |           |  |                                    |  |                      |  |          |  |
| Q.A                                                                                                                   |  |  |  |           |  |                                    |  |                      |  |          |  |
|                                                                                                                       |  |  |  |           |  | MATERIAL:                          |  | DWG NO.              |  |          |  |
|                                                                                                                       |  |  |  |           |  |                                    |  | AD-09 L7             |  |          |  |
|                                                                                                                       |  |  |  |           |  |                                    |  | A4                   |  |          |  |
|                                                                                                                       |  |  |  |           |  | WEIGHT:                            |  | SCALE:1:2            |  |          |  |
|                                                                                                                       |  |  |  |           |  |                                    |  | SHEET 1 OF 1         |  |          |  |
