# Supplementary material for: Construction and use of an adaptive optics two-photon microscope with direct wavefront sensing
Source: Springer Nature journal article supplement (doi:10.1038/s41596-023-00893-w), 2023-11-01
Supplement: MOESM1 [file 41596_2023_893_MOESM1_ESM.zip]

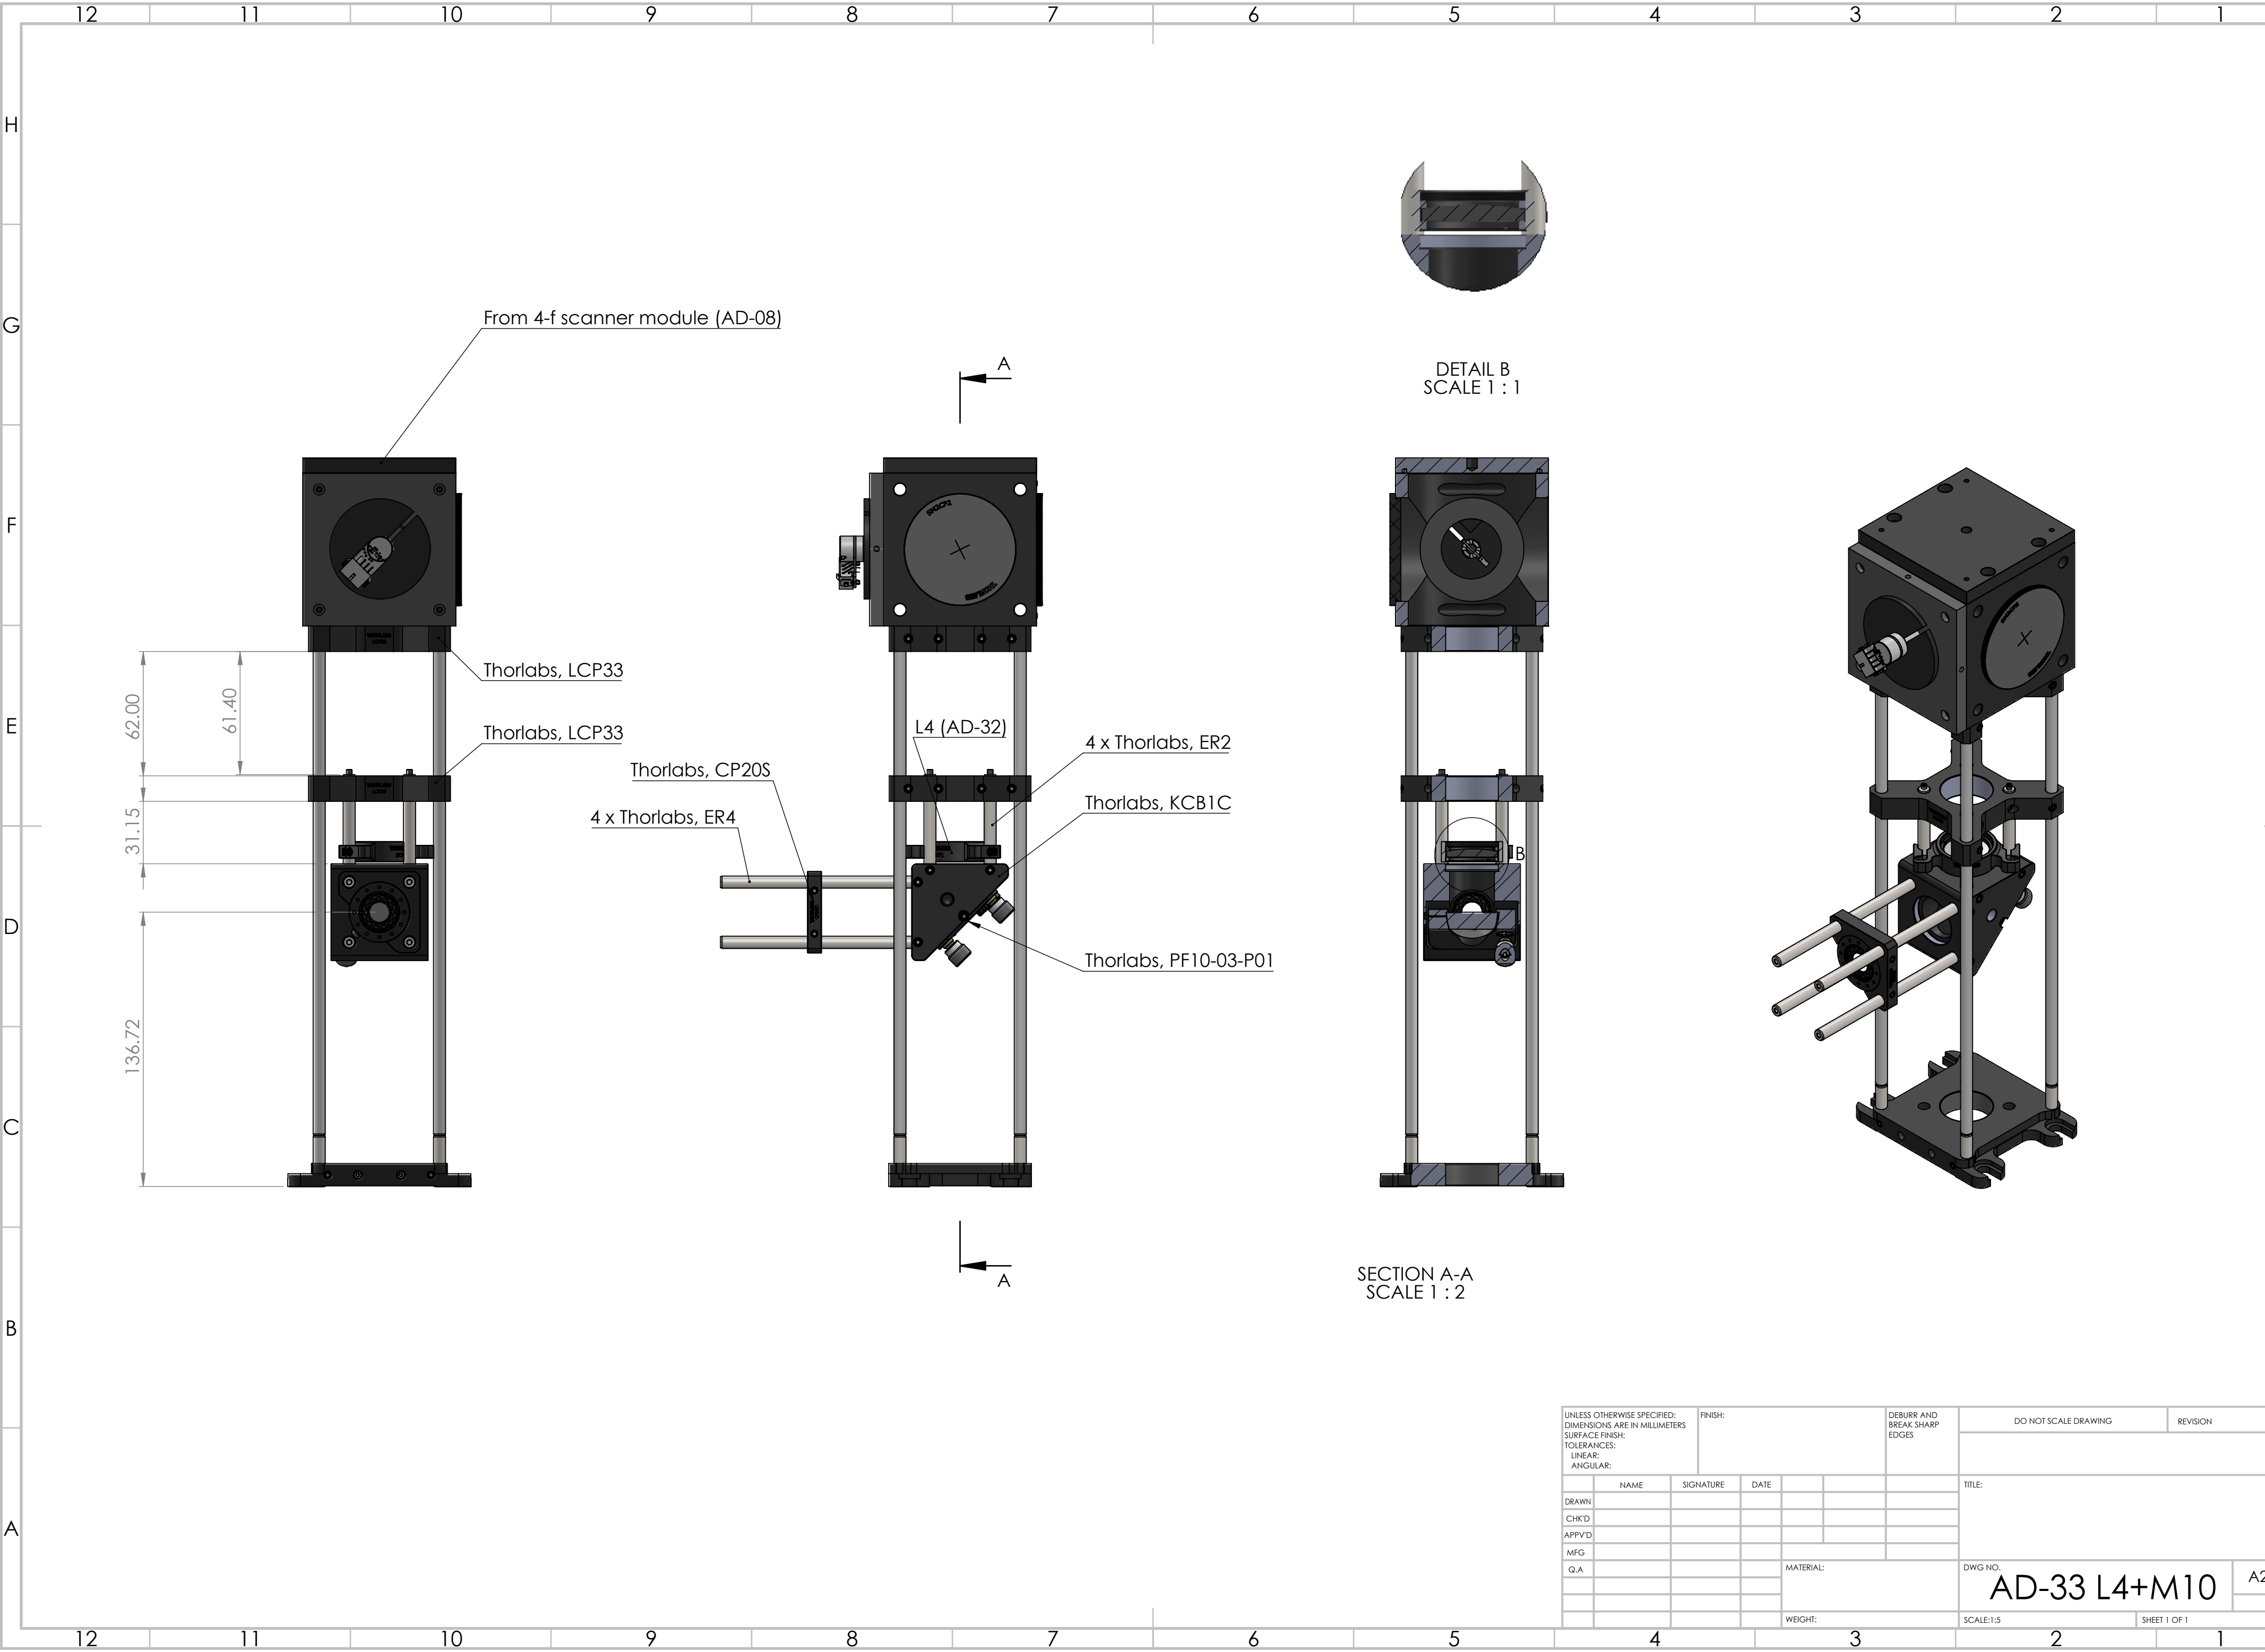

|                                                                                                                       |      |  |           |  |         |  |                                    |  |                      |  |              |  |  |
|-----------------------------------------------------------------------------------------------------------------------|------|--|-----------|--|---------|--|------------------------------------|--|----------------------|--|--------------|--|--|
| UNLESS OTHERWISE SPECIFIED:<br>DIMENSIONS ARE IN MILLIMETERS<br>SURFACE FINISH:<br>TOLERANCES:<br>LINEAR:<br>ANGULAR: |      |  |           |  | FINISH: |  | DEBURR AND<br>BREAK SHARP<br>EDGES |  | DO NOT SCALE DRAWING |  | REVISION     |  |  |
|                                                                                                                       |      |  |           |  |         |  |                                    |  |                      |  |              |  |  |
|                                                                                                                       | NAME |  | SIGNATURE |  | DATE    |  |                                    |  |                      |  | TITLE:       |  |  |
| DRAWN                                                                                                                 |      |  |           |  |         |  |                                    |  |                      |  |              |  |  |
| CHK'D                                                                                                                 |      |  |           |  |         |  |                                    |  |                      |  |              |  |  |
| APP'VD                                                                                                                |      |  |           |  |         |  |                                    |  |                      |  |              |  |  |
| MFG                                                                                                                   |      |  |           |  |         |  |                                    |  |                      |  |              |  |  |
| Q.A.                                                                                                                  |      |  |           |  |         |  | MATERIAL:                          |  | DWG NO.              |  | A2           |  |  |
|                                                                                                                       |      |  |           |  |         |  |                                    |  | AD-33 L4+M10         |  |              |  |  |
|                                                                                                                       |      |  |           |  |         |  |                                    |  |                      |  |              |  |  |
|                                                                                                                       |      |  |           |  |         |  | WEIGHT:                            |  | SCALE:1:5            |  | SHEET 1 OF 1 |  |  |
