# Supplementary material for: Construction and use of an adaptive optics two-photon microscope with direct wavefront sensing
Source: Springer Nature journal article supplement (doi:10.1038/s41596-023-00893-w), 2023-11-01
Supplement: MOESM1 [file 41596_2023_893_MOESM1_ESM.zip]

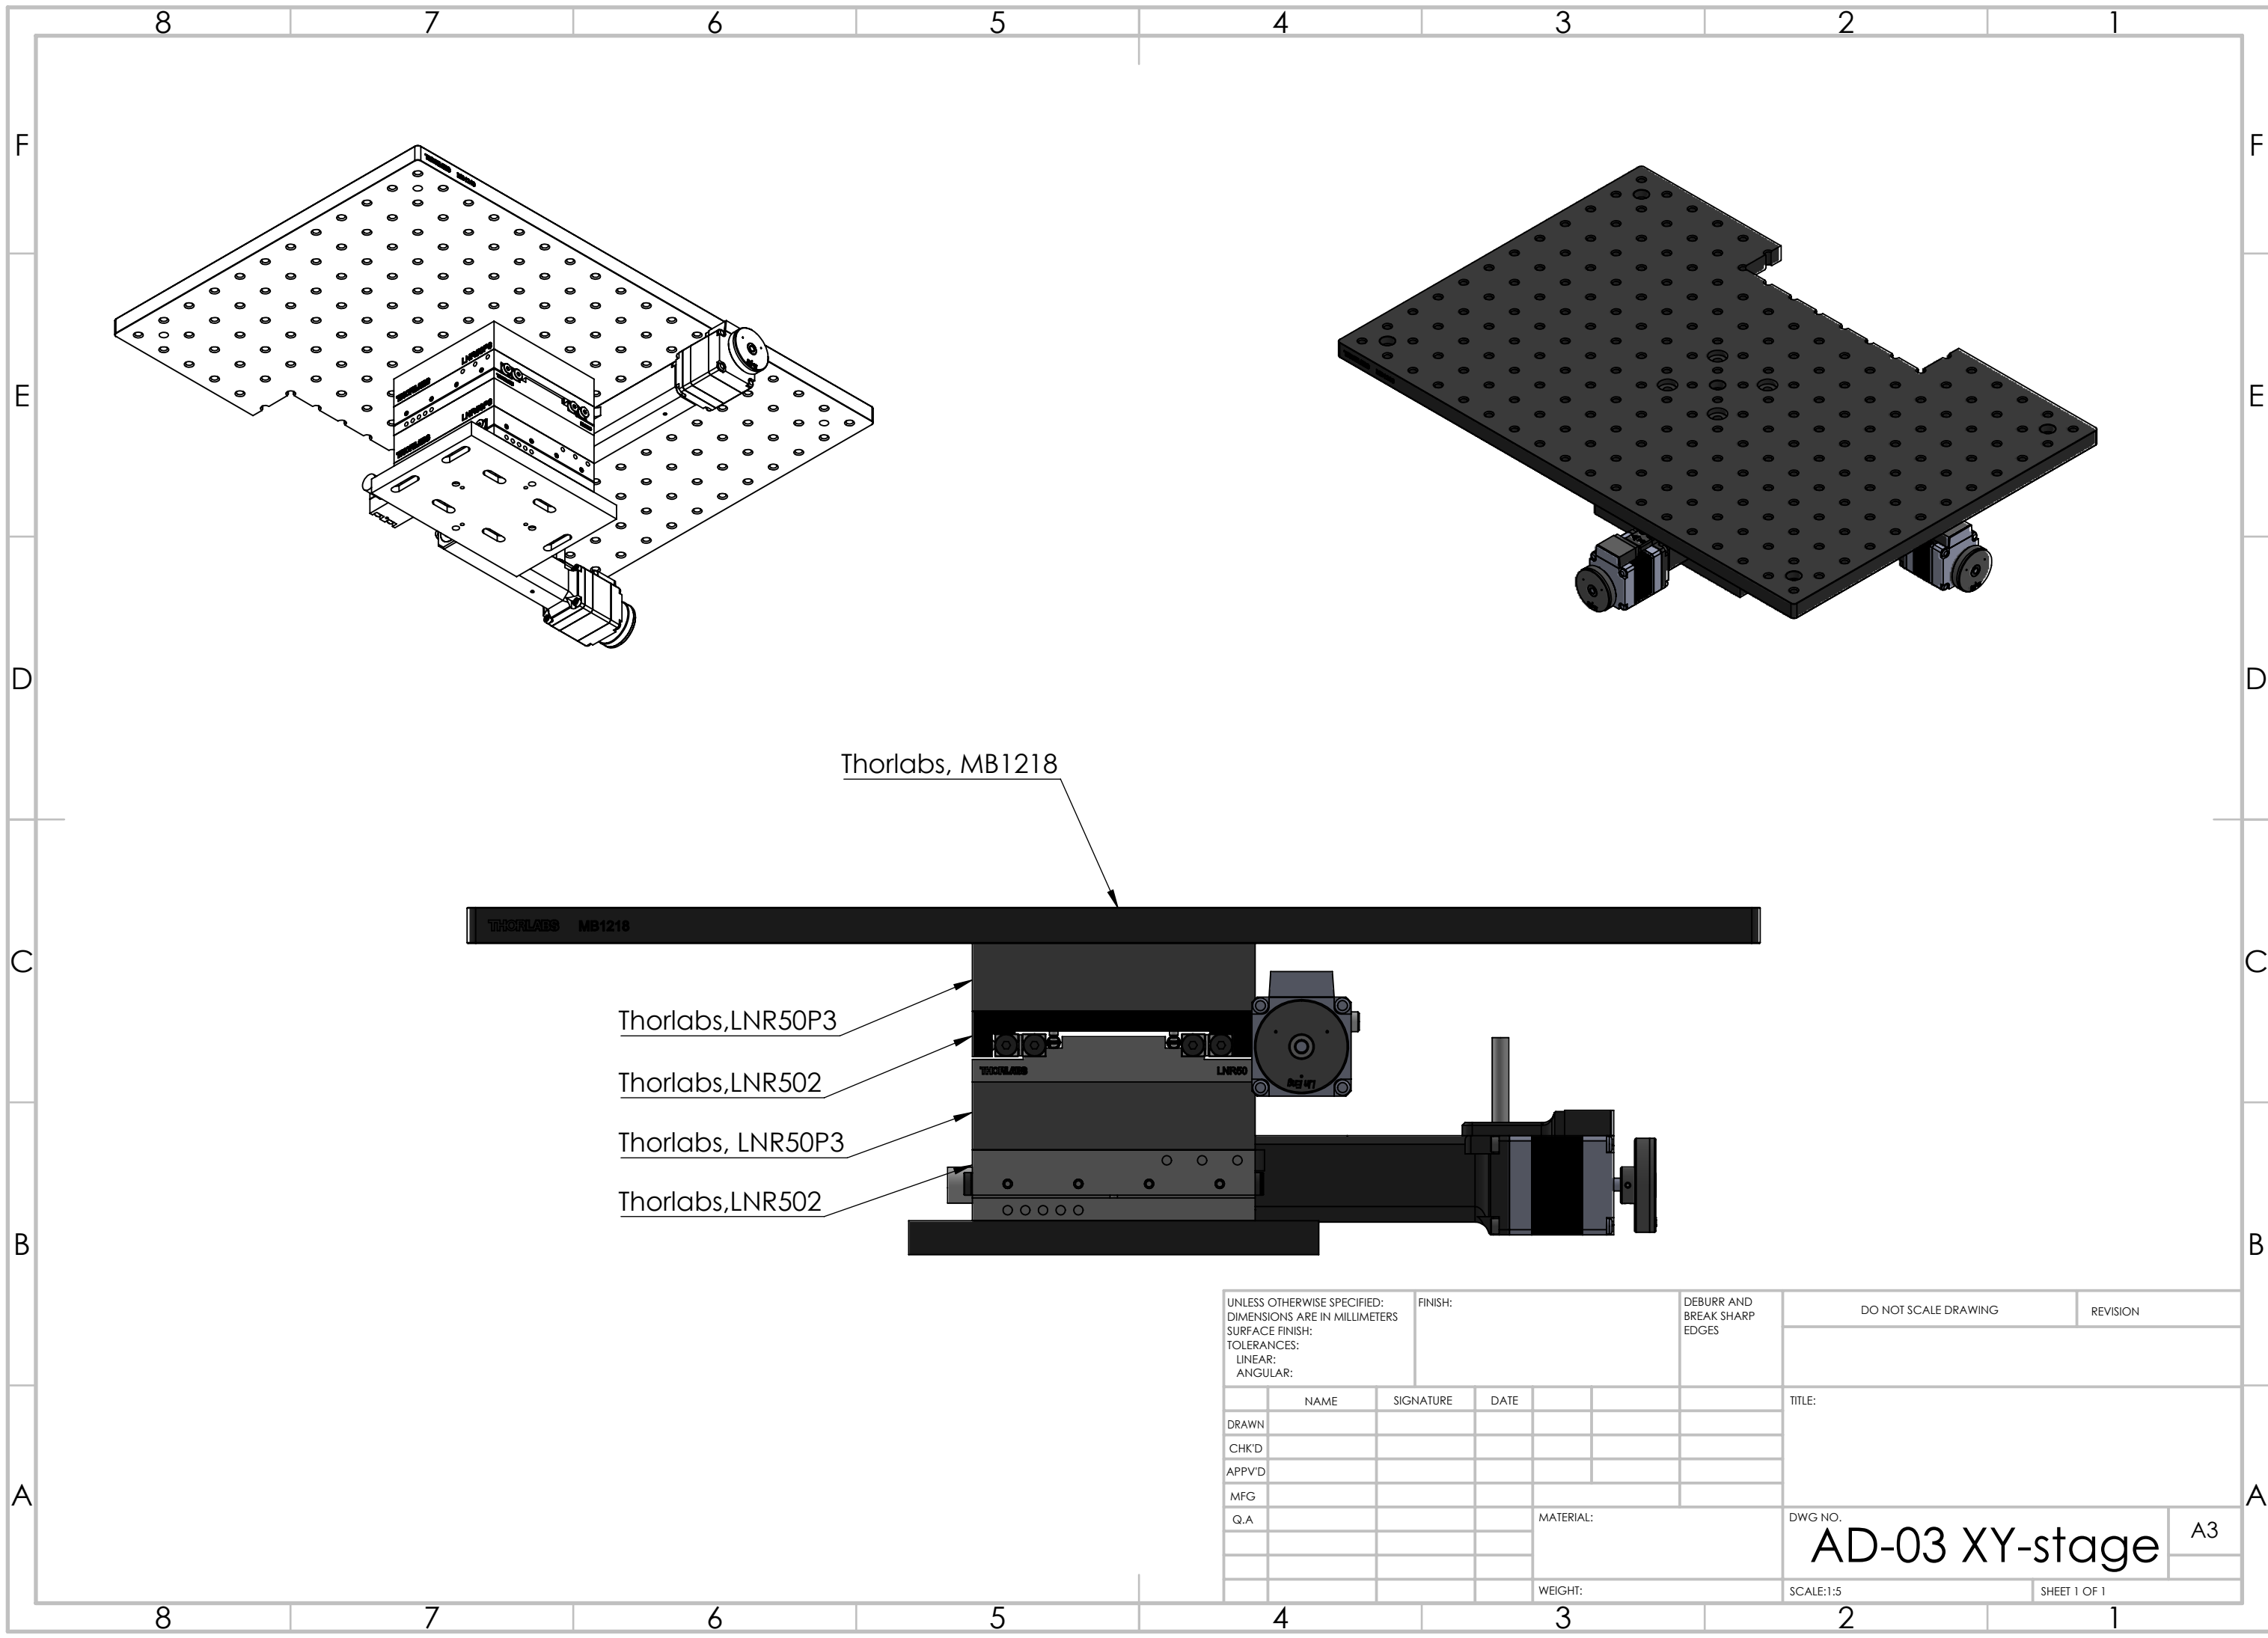

|                                                                                                                       |      |  |           |         |           |                                    |                      |  |              |  |
|-----------------------------------------------------------------------------------------------------------------------|------|--|-----------|---------|-----------|------------------------------------|----------------------|--|--------------|--|
| UNLESS OTHERWISE SPECIFIED:<br>DIMENSIONS ARE IN MILLIMETERS<br>SURFACE FINISH:<br>TOLERANCES:<br>LINEAR:<br>ANGULAR: |      |  |           | FINISH: |           | DEBURR AND<br>BREAK SHARP<br>EDGES | DO NOT SCALE DRAWING |  | REVISION     |  |
|                                                                                                                       |      |  |           |         |           |                                    |                      |  |              |  |
|                                                                                                                       | NAME |  | SIGNATURE |         | DATE      |                                    |                      |  | TITLE:       |  |
| DRAWN                                                                                                                 |      |  |           |         |           |                                    |                      |  |              |  |
| CHK'D                                                                                                                 |      |  |           |         |           |                                    |                      |  |              |  |
| APPV'D                                                                                                                |      |  |           |         |           |                                    |                      |  |              |  |
| MFG                                                                                                                   |      |  |           |         |           |                                    |                      |  |              |  |
| Q.A                                                                                                                   |      |  |           |         |           |                                    |                      |  |              |  |
|                                                                                                                       |      |  |           |         | MATERIAL: |                                    | DWG NO.              |  | A3           |  |
|                                                                                                                       |      |  |           |         |           |                                    | AD-03 XY-stage       |  |              |  |
|                                                                                                                       |      |  |           |         |           |                                    |                      |  |              |  |
|                                                                                                                       |      |  |           |         | WEIGHT:   |                                    | SCALE:1:5            |  | SHEET 1 OF 1 |  |

AD-03 XY-stage
