# Supplementary material for: Construction and use of an adaptive optics two-photon microscope with direct wavefront sensing
Source: Springer Nature journal article supplement (doi:10.1038/s41596-023-00893-w), 2023-11-01
Supplement: MOESM1 [file 41596_2023_893_MOESM1_ESM.zip]

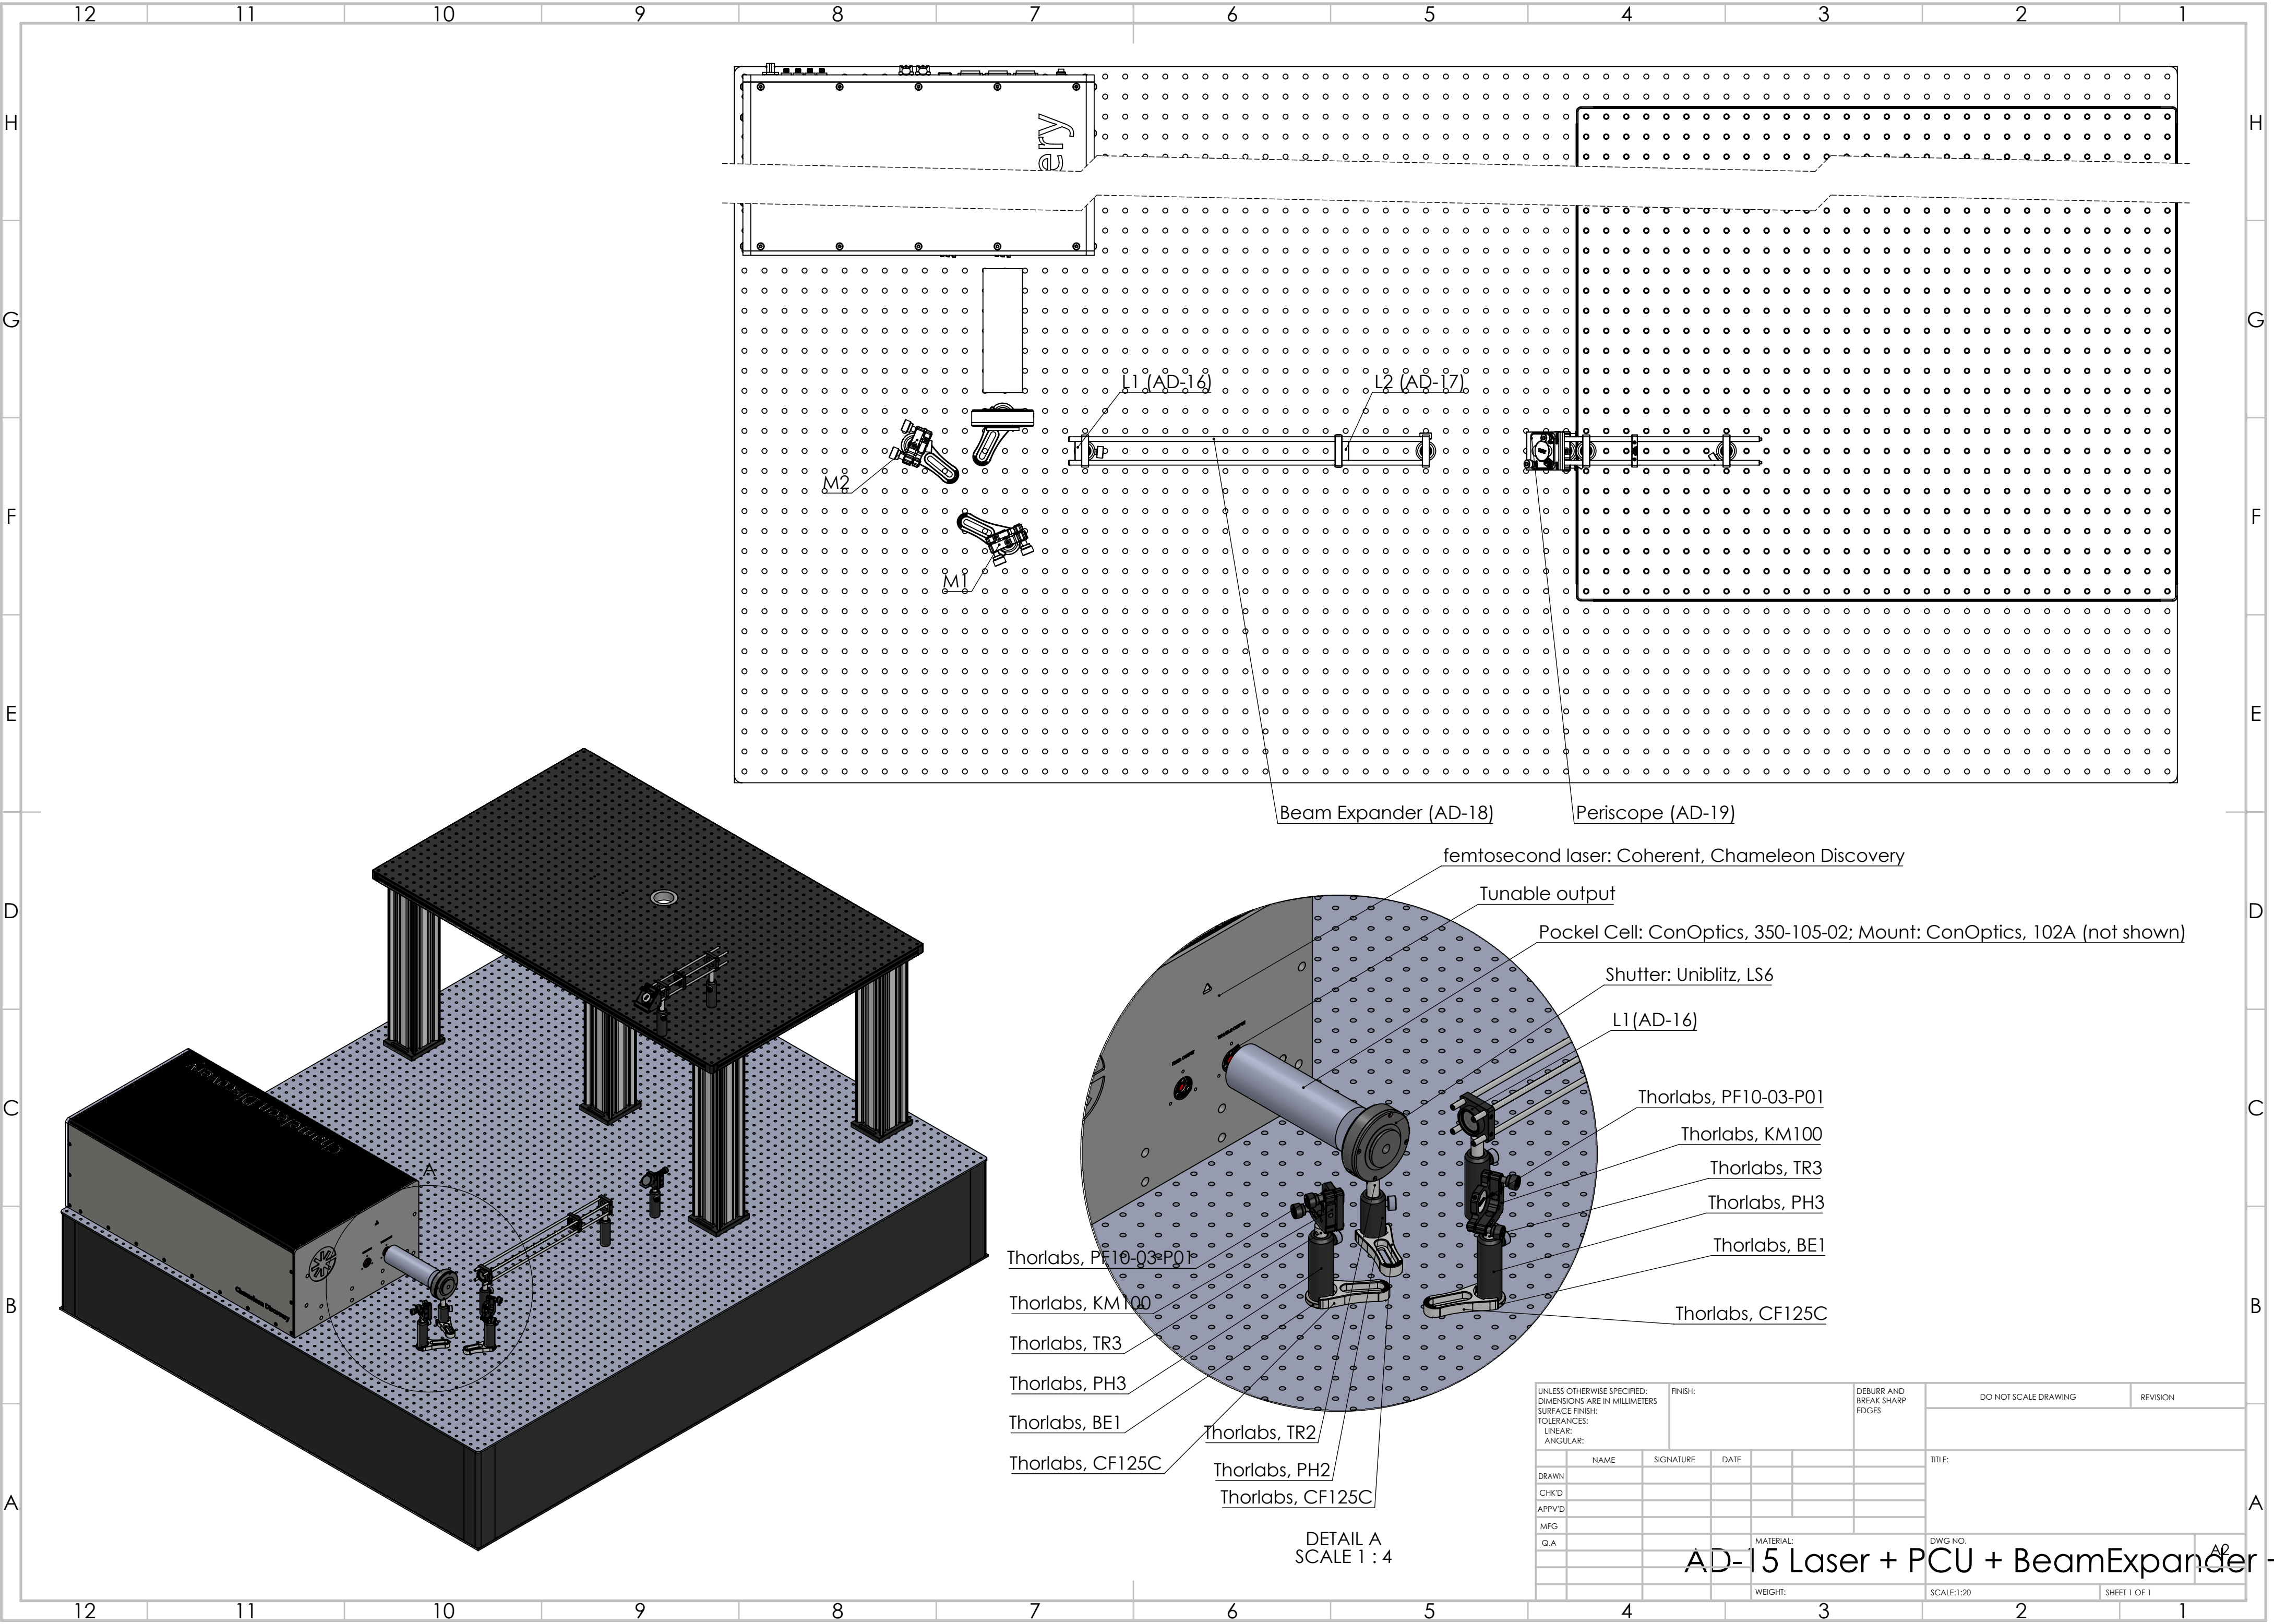

|                                                                                                                       |  |           |  |           |  |  |                                    |  |  |                      |  |              |          |        |  |
|-----------------------------------------------------------------------------------------------------------------------|--|-----------|--|-----------|--|--|------------------------------------|--|--|----------------------|--|--------------|----------|--------|--|
| UNLESS OTHERWISE SPECIFIED:<br>DIMENSIONS ARE IN MILLIMETERS<br>SURFACE FINISH:<br>TOLERANCES:<br>LINEAR:<br>ANGULAR: |  |           |  | FINISH:   |  |  | DEBURR AND<br>BREAK SHARP<br>EDGES |  |  | DO NOT SCALE DRAWING |  |              | REVISION |        |  |
|                                                                                                                       |  |           |  |           |  |  |                                    |  |  |                      |  |              |          | TITLE: |  |
| NAME                                                                                                                  |  | SIGNATURE |  | DATE      |  |  |                                    |  |  |                      |  |              |          |        |  |
| DRAWN                                                                                                                 |  |           |  |           |  |  |                                    |  |  |                      |  |              |          |        |  |
| CHK'D                                                                                                                 |  |           |  |           |  |  |                                    |  |  |                      |  |              |          |        |  |
| APPV'D                                                                                                                |  |           |  |           |  |  |                                    |  |  |                      |  |              |          |        |  |
| MFG                                                                                                                   |  |           |  |           |  |  |                                    |  |  |                      |  |              |          |        |  |
| Q.A                                                                                                                   |  |           |  |           |  |  |                                    |  |  |                      |  |              |          |        |  |
|                                                                                                                       |  |           |  | MATERIAL: |  |  | DWG NO.                            |  |  |                      |  | AP           |          |        |  |
| AD-15 Laser + PCU + BeamExpand                                                                                        |  |           |  |           |  |  |                                    |  |  |                      |  |              |          |        |  |
|                                                                                                                       |  |           |  | WEIGHT:   |  |  | SCALE:1:20                         |  |  |                      |  | SHEET 1 OF 1 |          |        |  |
