# Supplementary material for: Construction and use of an adaptive optics two-photon microscope with direct wavefront sensing
Source: Springer Nature journal article supplement (doi:10.1038/s41596-023-00893-w), 2023-11-01
Supplement: MOESM2 [file 41596_2023_893_MOESM2_ESM.zip]

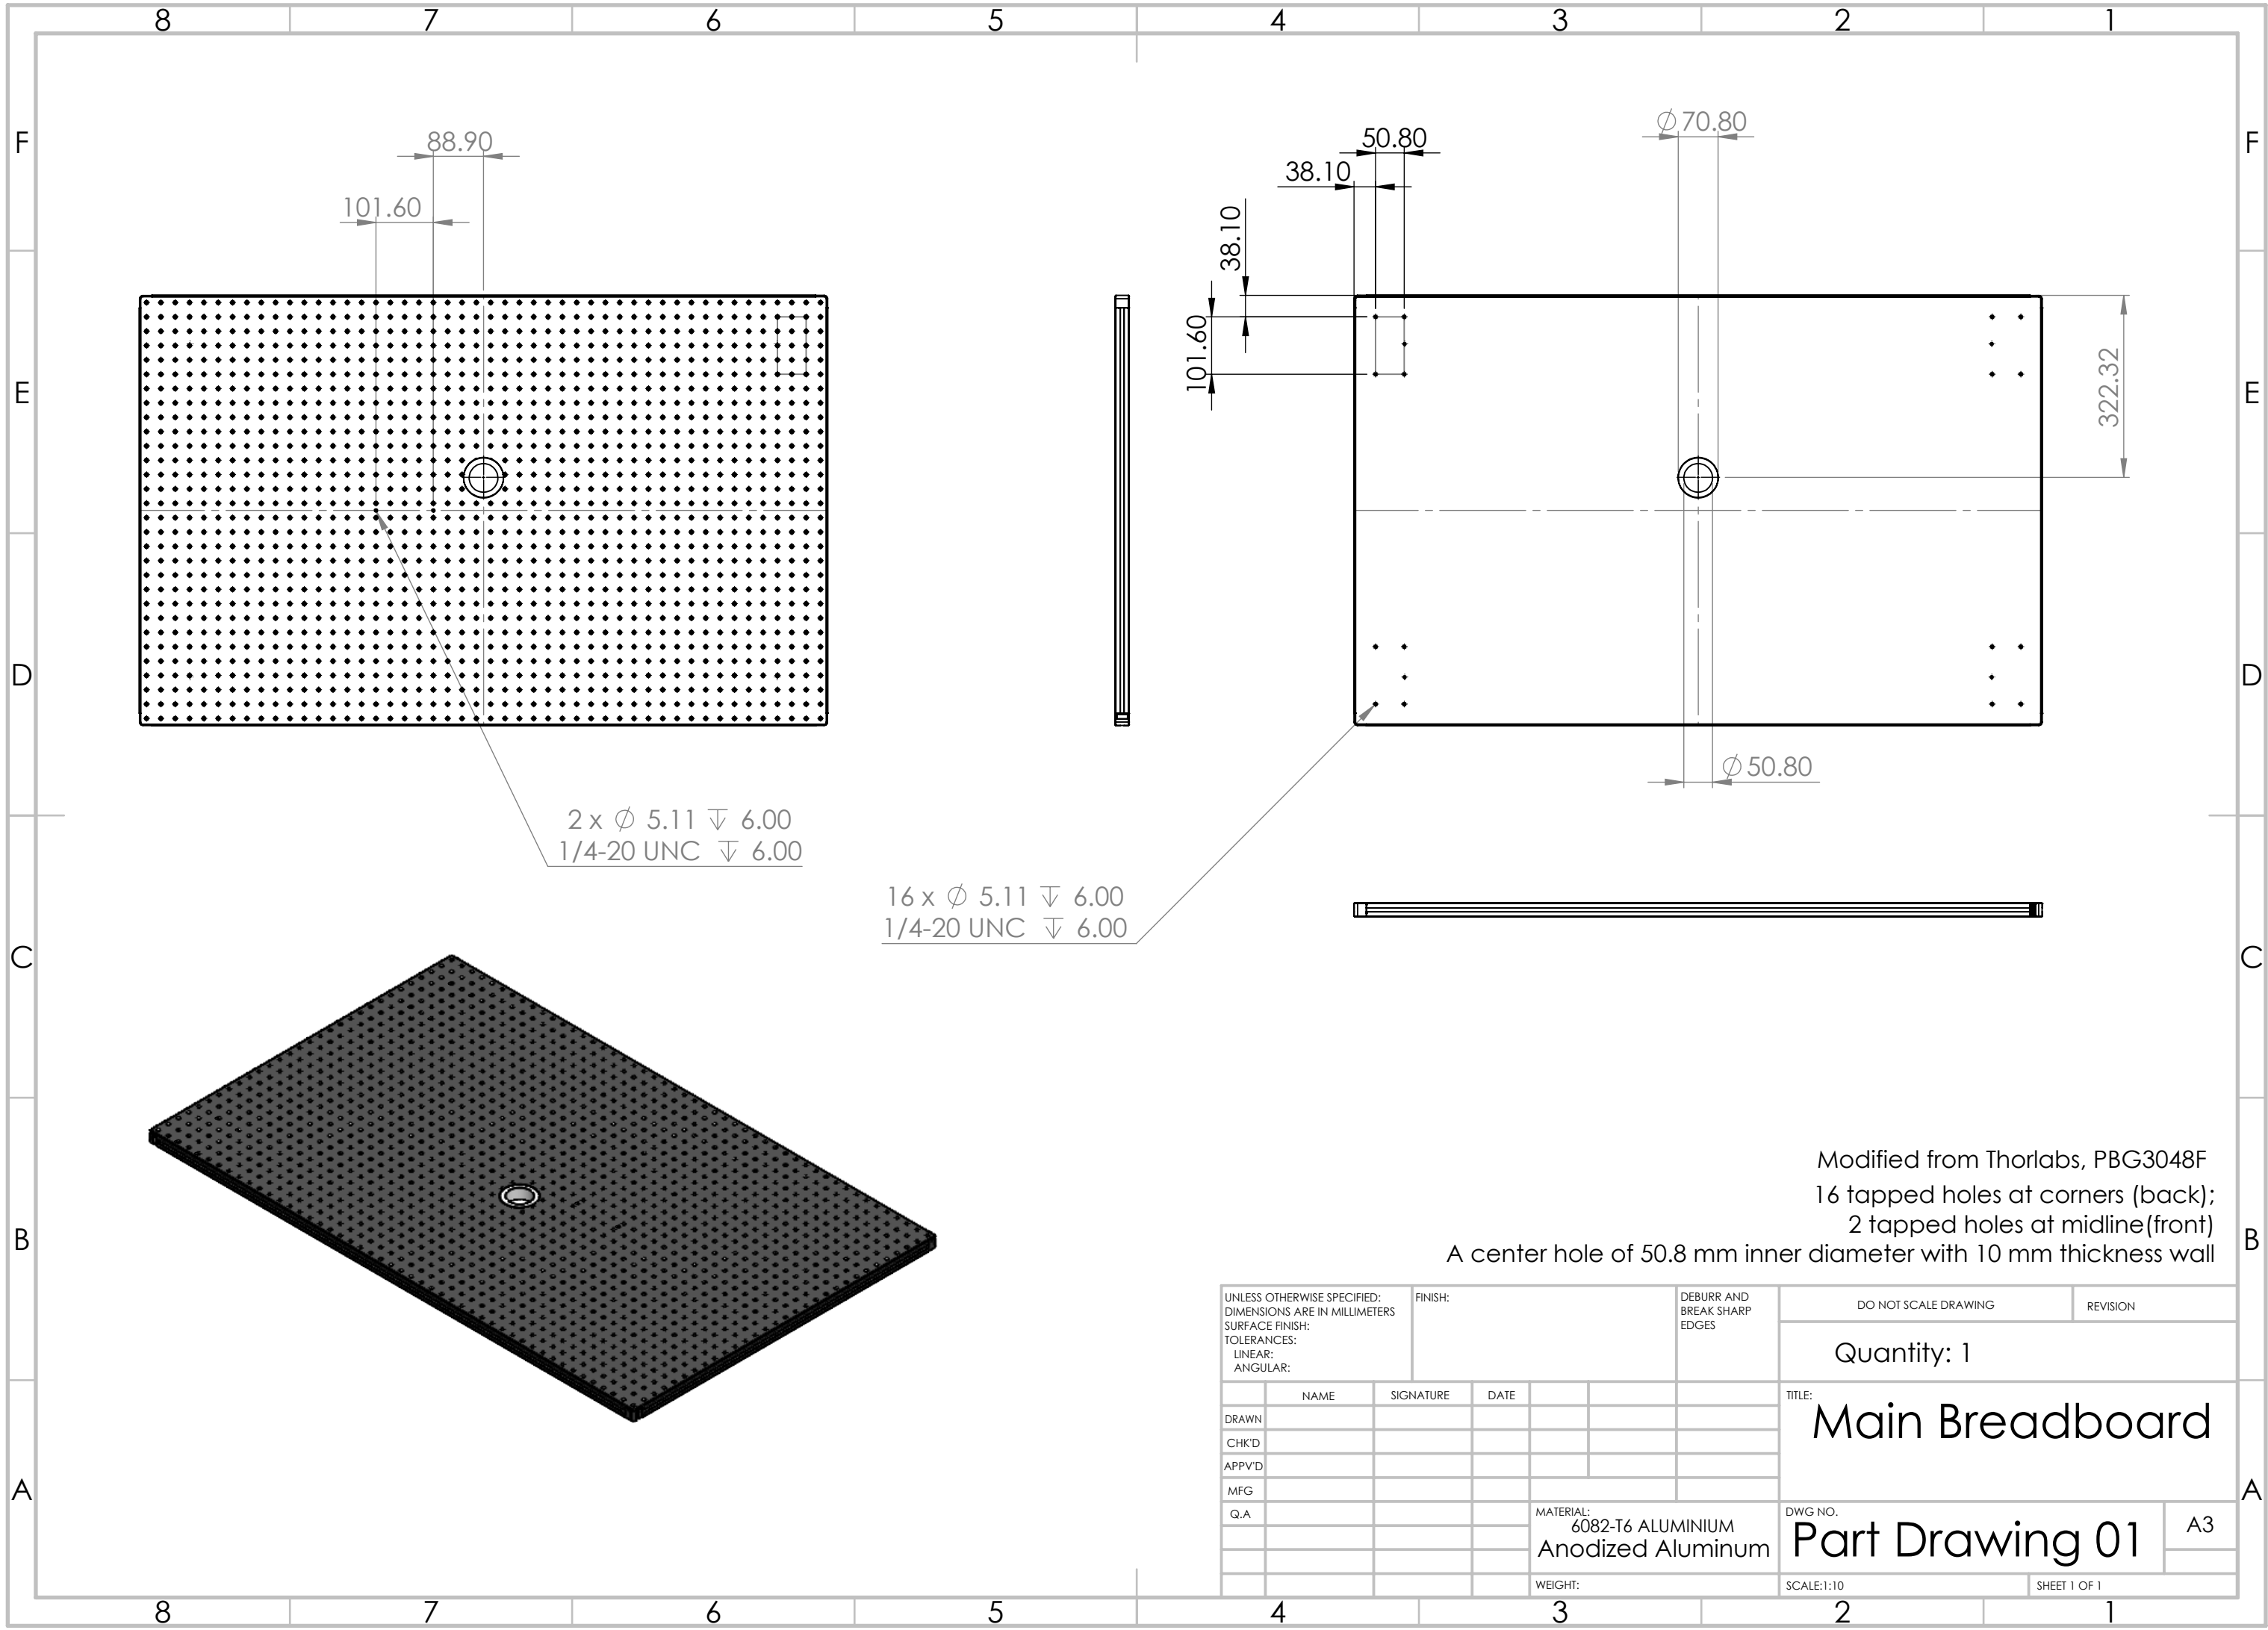

|                                                                                                                       |      |  |           |         |      |                                                     |         |                      |                               |          |              |  |
|-----------------------------------------------------------------------------------------------------------------------|------|--|-----------|---------|------|-----------------------------------------------------|---------|----------------------|-------------------------------|----------|--------------|--|
| UNLESS OTHERWISE SPECIFIED:<br>DIMENSIONS ARE IN MILLIMETERS<br>SURFACE FINISH:<br>TOLERANCES:<br>LINEAR:<br>ANGULAR: |      |  |           | FINISH: |      | DEBURR AND<br>BREAK SHARP<br>EDGES                  |         | DO NOT SCALE DRAWING |                               | REVISION |              |  |
|                                                                                                                       |      |  |           |         |      |                                                     |         | Quantity: 1          |                               |          |              |  |
|                                                                                                                       | NAME |  | SIGNATURE |         | DATE |                                                     |         |                      | TITLE:<br><br>Main Breadboard |          |              |  |
| DRAWN                                                                                                                 |      |  |           |         |      |                                                     |         |                      |                               |          |              |  |
| CHK'D                                                                                                                 |      |  |           |         |      |                                                     |         |                      |                               |          |              |  |
| APPV'D                                                                                                                |      |  |           |         |      |                                                     |         |                      |                               |          |              |  |
| MFG                                                                                                                   |      |  |           |         |      |                                                     |         |                      |                               |          |              |  |
| Q.A                                                                                                                   |      |  |           |         |      | MATERIAL:<br>6082-T6 ALUMINIUM<br>Anodized Aluminum |         | DWG NO.              |                               | A3       |              |  |
|                                                                                                                       |      |  |           |         |      |                                                     |         | Part Drawing 01      |                               |          |              |  |
|                                                                                                                       |      |  |           |         |      |                                                     | WEIGHT: |                      | SCALE:1:10                    |          | SHEET 1 OF 1 |  |
