# Supplementary material for: Construction and use of an adaptive optics two-photon microscope with direct wavefront sensing
Source: Springer Nature journal article supplement (doi:10.1038/s41596-023-00893-w), 2023-11-01
Supplement: MOESM2 [file 41596_2023_893_MOESM2_ESM.zip]

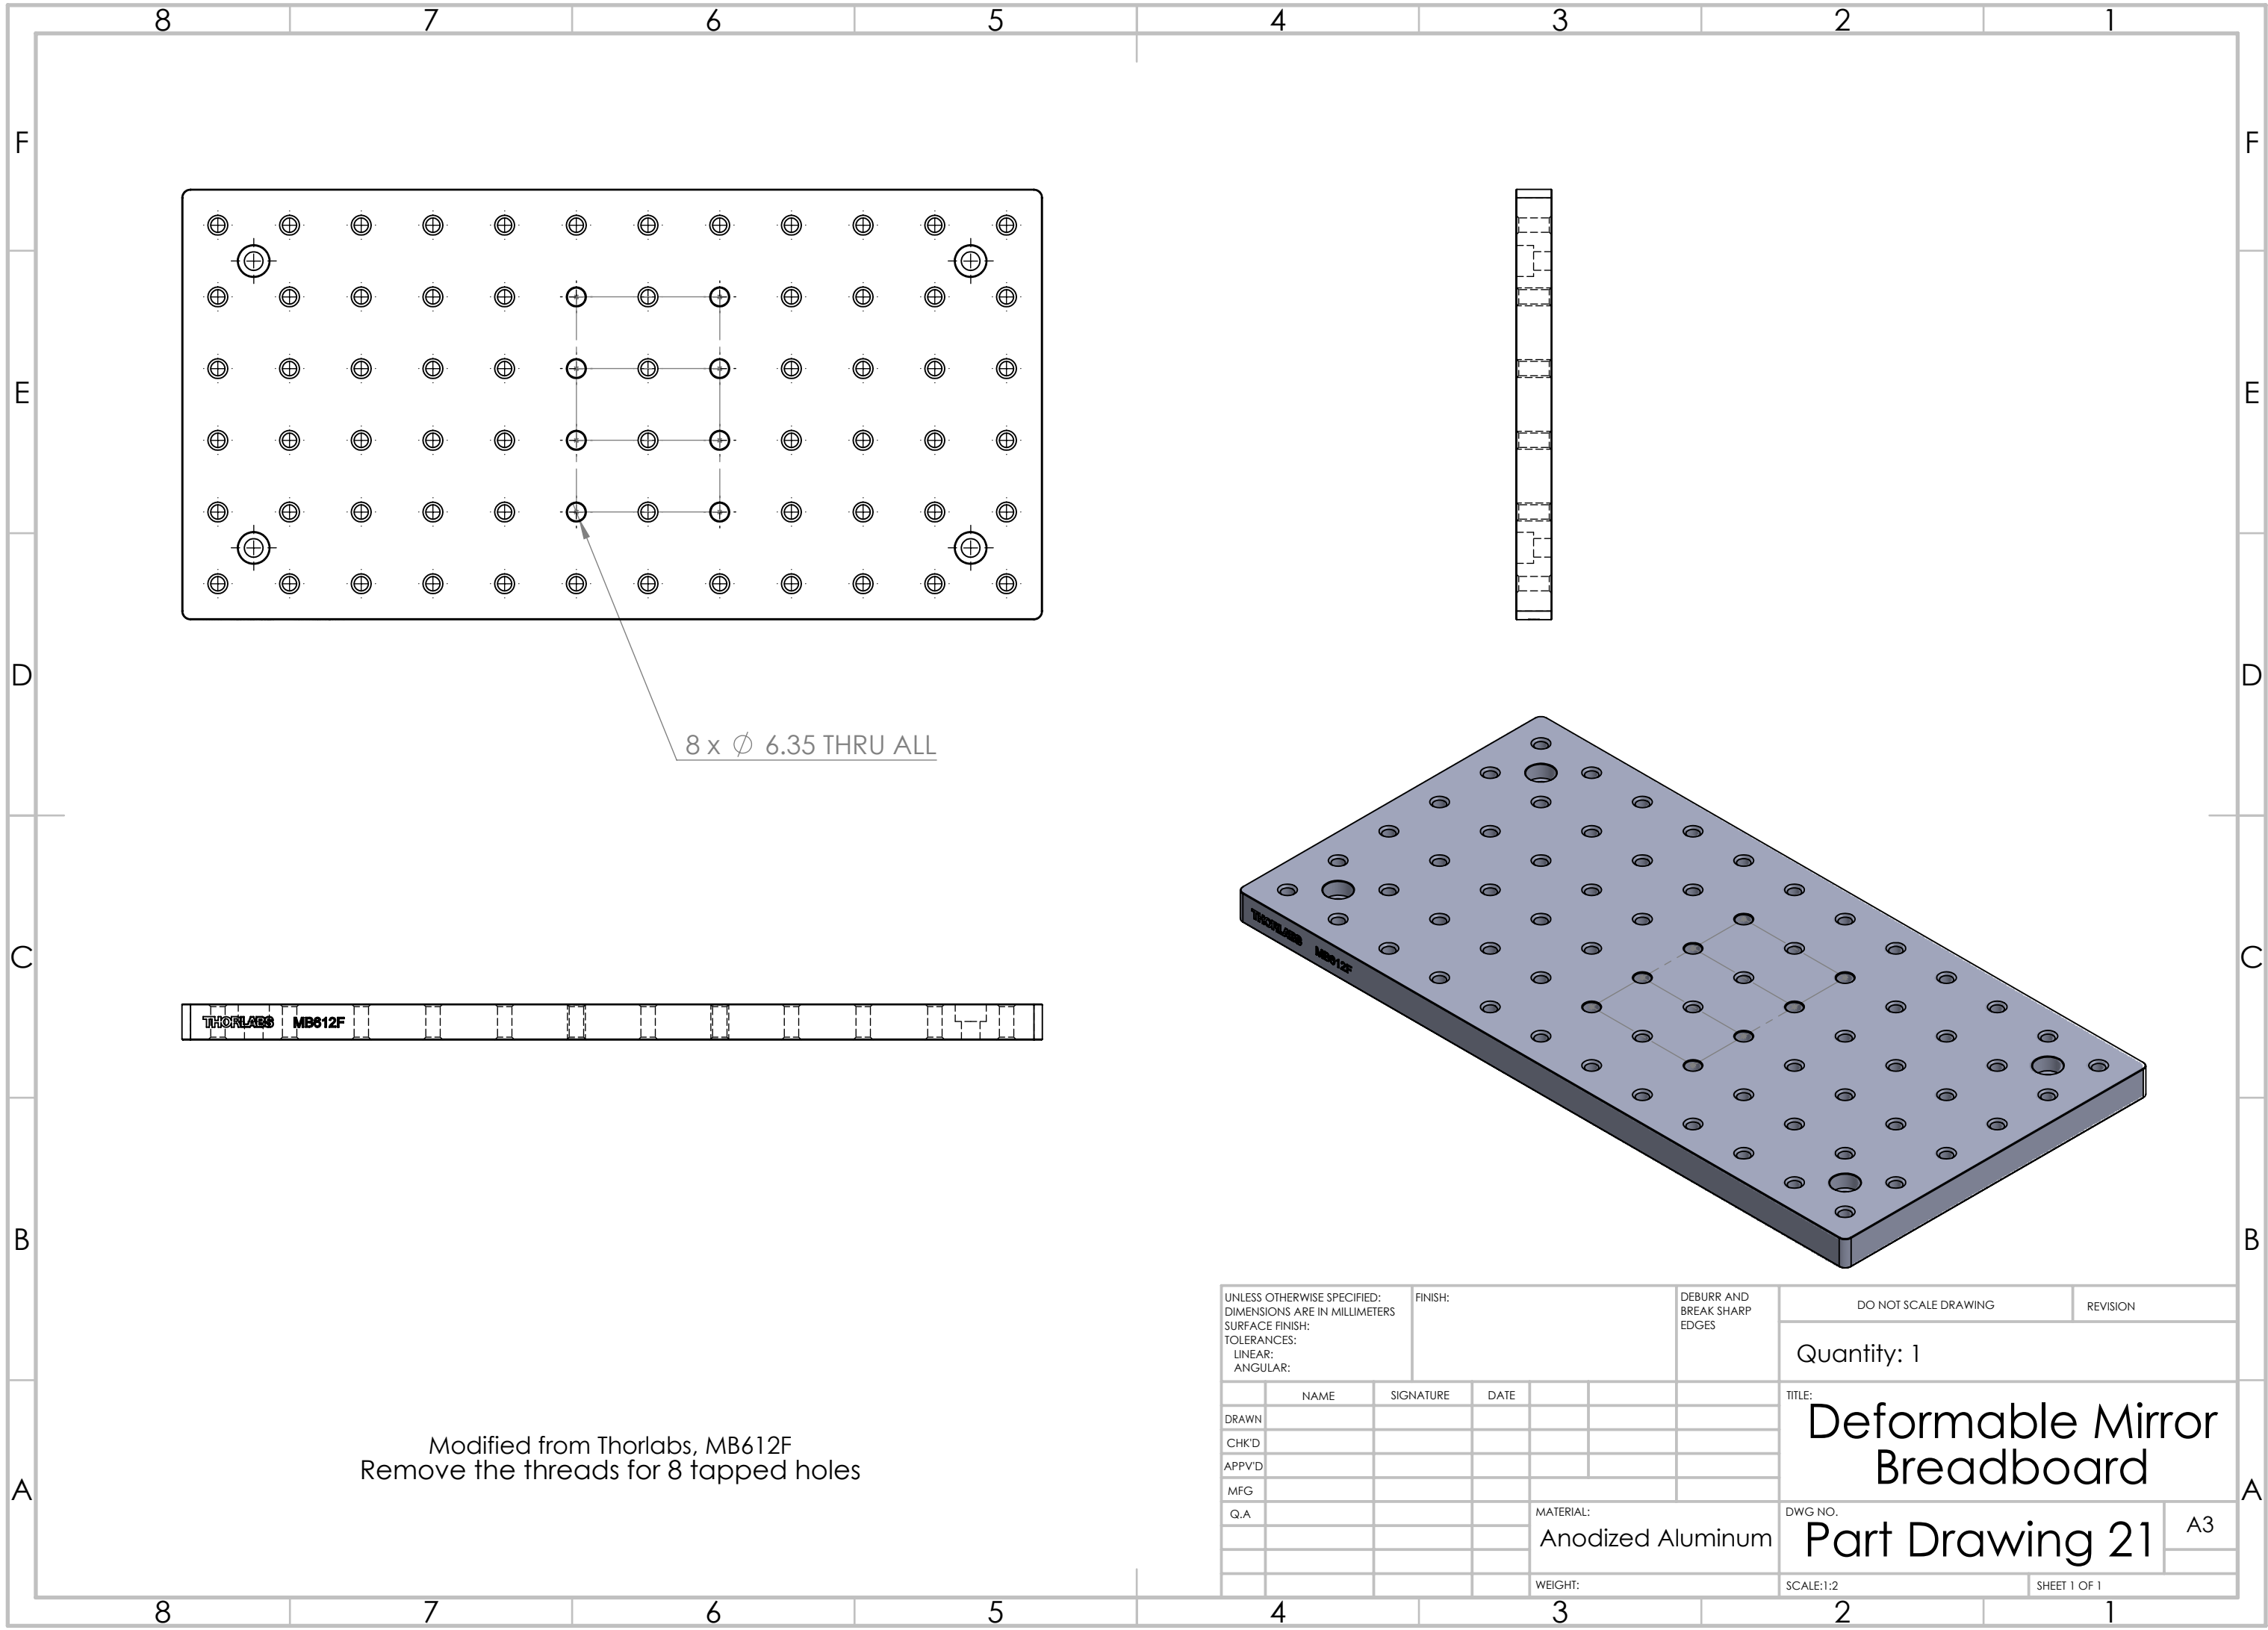

THORLABS MB612F

8 x Ø 6.35 THRU ALL

Modified from Thorlabs, MB612F  
Remove the threads for 8 tapped holes

|                                                                                                                       |      |           |      |         |  |                                    |                                                   |              |
|-----------------------------------------------------------------------------------------------------------------------|------|-----------|------|---------|--|------------------------------------|---------------------------------------------------|--------------|
| UNLESS OTHERWISE SPECIFIED:<br>DIMENSIONS ARE IN MILLIMETERS<br>SURFACE FINISH:<br>TOLERANCES:<br>LINEAR:<br>ANGULAR: |      |           |      | FINISH: |  | DEBURR AND<br>BREAK SHARP<br>EDGES | DO NOT SCALE DRAWING                              | REVISION     |
|                                                                                                                       |      |           |      |         |  |                                    | Quantity: 1                                       |              |
| DRAWN                                                                                                                 | NAME | SIGNATURE | DATE |         |  |                                    | TITLE:<br><b>Deformable Mirror<br/>Breadboard</b> |              |
| CHK'D                                                                                                                 |      |           |      |         |  |                                    |                                                   |              |
| APPV'D                                                                                                                |      |           |      |         |  |                                    |                                                   |              |
| MFG                                                                                                                   |      |           |      |         |  |                                    |                                                   |              |
| Q.A                                                                                                                   |      |           |      |         |  |                                    |                                                   |              |
|                                                                                                                       |      |           |      |         |  | MATERIAL:<br>Anodized Aluminum     | DWG NO.                                           | A3           |
|                                                                                                                       |      |           |      |         |  | WEIGHT:                            | SCALE:1:2                                         | SHEET 1 OF 1 |
