# Supplementary material for: Construction and use of an adaptive optics two-photon microscope with direct wavefront sensing
Source: Springer Nature journal article supplement (doi:10.1038/s41596-023-00893-w), 2023-11-01
Supplement: MOESM2 [file 41596_2023_893_MOESM2_ESM.zip]

|                                                                                                                                                                                                                                                                                                                                                                                                                                                                                                                                                                                                                                                                                                                                                                                                                                                                                                                                                                                                                                                                                                                  |  |  |  |   |  |  |  |   |  |  |  |   |  |  |  |
|------------------------------------------------------------------------------------------------------------------------------------------------------------------------------------------------------------------------------------------------------------------------------------------------------------------------------------------------------------------------------------------------------------------------------------------------------------------------------------------------------------------------------------------------------------------------------------------------------------------------------------------------------------------------------------------------------------------------------------------------------------------------------------------------------------------------------------------------------------------------------------------------------------------------------------------------------------------------------------------------------------------------------------------------------------------------------------------------------------------|--|--|--|---|--|--|--|---|--|--|--|---|--|--|--|
| 4                                                                                                                                                                                                                                                                                                                                                                                                                                                                                                                                                                                                                                                                                                                                                                                                                                                                                                                                                                                                                                                                                                                |  |  |  | 3 |  |  |  | 2 |  |  |  | 1 |  |  |  |
| F                                                                                                                                                                                                                                                                                                                                                                                                                                                                                                                                                                                                                                                                                                                                                                                                                                                                                                                                                                                                                                                                                                                |  |  |  |   |  |  |  |   |  |  |  |   |  |  |  |
| E                                                                                                                                                                                                                                                                                                                                                                                                                                                                                                                                                                                                                                                                                                                                                                                                                                                                                                                                                                                                                                                                                                                |  |  |  |   |  |  |  |   |  |  |  |   |  |  |  |
| D                                                                                                                                                                                                                                                                                                                                                                                                                                                                                                                                                                                                                                                                                                                                                                                                                                                                                                                                                                                                                                                                                                                |  |  |  |   |  |  |  |   |  |  |  |   |  |  |  |
| C                                                                                                                                                                                                                                                                                                                                                                                                                                                                                                                                                                                                                                                                                                                                                                                                                                                                                                                                                                                                                                                                                                                |  |  |  |   |  |  |  |   |  |  |  |   |  |  |  |
| B                                                                                                                                                                                                                                                                                                                                                                                                                                                                                                                                                                                                                                                                                                                                                                                                                                                                                                                                                                                                                                                                                                                |  |  |  |   |  |  |  |   |  |  |  |   |  |  |  |
| A                                                                                                                                                                                                                                                                                                                                                                                                                                                                                                                                                                                                                                                                                                                                                                                                                                                                                                                                                                                                                                                                                                                |  |  |  |   |  |  |  |   |  |  |  |   |  |  |  |
| <div><div>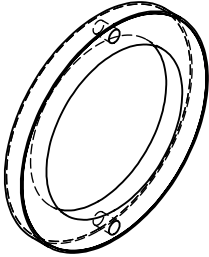</div><div></div><div></div></div> <p>Modified from LINOS Microbench, G065078000<br/>Enlarge center hole</p> <div><div><div>UNLESS OTHERWISE SPECIFIED:<br/>DIMENSIONS ARE IN MILLIMETERS<br/>SURFACE FINISH:<br/>TOLERANCES:<br/>LINEAR:<br/>ANGULAR:</div><div>FINISH:</div><div>DEBURR AND<br/>BREAK SHARP<br/>EDGES</div></div><div><div>DO NOT SCALE DRAWING</div><div>REVISION</div></div></div> <div><div><div><div>DRAWN</div><div>CHK'D</div><div>APPV'D</div><div>MFG</div><div>Q.A</div></div><div><div>NAME</div><div>SIGNATURE</div><div>DATE</div></div></div><div><div><div>MATERIAL:<br/>Anodized Aluminum</div><div>WEIGHT:</div></div><div><div>TITLE:<br/>Retaining Ring<br/>(for L12 ~ L14)</div><div>DWG NO.<br/>Part Drawing 18</div></div></div><div><div>A4</div><div>SCALE:1:1</div><div>SHEET 1 OF 1</div></div></div> |  |  |  |   |  |  |  |   |  |  |  |   |  |  |  |
