# Supplementary material for: Construction and use of an adaptive optics two-photon microscope with direct wavefront sensing
Source: Springer Nature journal article supplement (doi:10.1038/s41596-023-00893-w), 2023-11-01
Supplement: MOESM2 [file 41596_2023_893_MOESM2_ESM.zip]

|                                                                                                                                                                                                                                                                                                                                                                                                        |  |  |  |           |  |  |  |                                    |  |  |  |                      |  |  |  |          |  |  |  |
|--------------------------------------------------------------------------------------------------------------------------------------------------------------------------------------------------------------------------------------------------------------------------------------------------------------------------------------------------------------------------------------------------------|--|--|--|-----------|--|--|--|------------------------------------|--|--|--|----------------------|--|--|--|----------|--|--|--|
| 4                                                                                                                                                                                                                                                                                                                                                                                                      |  |  |  | 3         |  |  |  | 2                                  |  |  |  | 1                    |  |  |  |          |  |  |  |
| F                                                                                                                                                                                                                                                                                                                                                                                                      |  |  |  |           |  |  |  |                                    |  |  |  |                      |  |  |  |          |  |  |  |
| E                                                                                                                                                                                                                                                                                                                                                                                                      |  |  |  |           |  |  |  |                                    |  |  |  |                      |  |  |  |          |  |  |  |
| D                                                                                                                                                                                                                                                                                                                                                                                                      |  |  |  |           |  |  |  |                                    |  |  |  |                      |  |  |  |          |  |  |  |
| C                                                                                                                                                                                                                                                                                                                                                                                                      |  |  |  |           |  |  |  |                                    |  |  |  |                      |  |  |  |          |  |  |  |
| B                                                                                                                                                                                                                                                                                                                                                                                                      |  |  |  |           |  |  |  |                                    |  |  |  |                      |  |  |  |          |  |  |  |
| A                                                                                                                                                                                                                                                                                                                                                                                                      |  |  |  |           |  |  |  |                                    |  |  |  |                      |  |  |  |          |  |  |  |
| <div><div>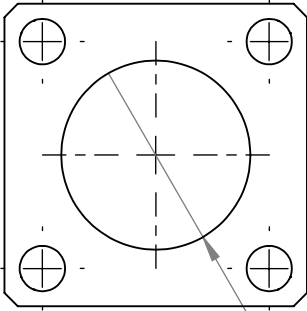</div><div>M25 x 0.75 Internal Thread</div></div> |  |  |  |           |  |  |  |                                    |  |  |  |                      |  |  |  |          |  |  |  |
| Modified from LINOS Microbench, G061008000<br>Tapped hole (M25 x 0.75) for the Olympus objective                                                                                                                                                                                                                                                                                                       |  |  |  |           |  |  |  |                                    |  |  |  |                      |  |  |  |          |  |  |  |
| UNLESS OTHERWISE SPECIFIED:<br>DIMENSIONS ARE IN MILLIMETERS<br>SURFACE FINISH:<br>TOLERANCES:<br>LINEAR:<br>ANGULAR:                                                                                                                                                                                                                                                                                  |  |  |  | FINISH:   |  |  |  | DEBURR AND<br>BREAK SHARP<br>EDGES |  |  |  | DO NOT SCALE DRAWING |  |  |  | REVISION |  |  |  |
| Quantity: 1                                                                                                                                                                                                                                                                                                                                                                                            |  |  |  |           |  |  |  |                                    |  |  |  |                      |  |  |  |          |  |  |  |
| TITLE:<br><div>Objective<br/>Mounting Plate</div>                                                                                                                                                                                                                                                                                                                                                      |  |  |  |           |  |  |  | A                                  |  |  |  |                      |  |  |  |          |  |  |  |
| DWG NO.<br><div>Part Drawing 11</div>                                                                                                                                                                                                                                                                                                                                                                  |  |  |  |           |  |  |  | A4                                 |  |  |  |                      |  |  |  |          |  |  |  |
| SCALE:1:1                                                                                                                                                                                                                                                                                                                                                                                              |  |  |  |           |  |  |  | SHEET 1 OF 1                       |  |  |  |                      |  |  |  |          |  |  |  |
| WEIGHT:                                                                                                                                                                                                                                                                                                                                                                                                |  |  |  |           |  |  |  |                                    |  |  |  |                      |  |  |  |          |  |  |  |
| MATERIAL:<br>Anodized Aluminum                                                                                                                                                                                                                                                                                                                                                                         |  |  |  |           |  |  |  |                                    |  |  |  |                      |  |  |  |          |  |  |  |
| NAME                                                                                                                                                                                                                                                                                                                                                                                                   |  |  |  | SIGNATURE |  |  |  | DATE                               |  |  |  |                      |  |  |  |          |  |  |  |
| DRAWN                                                                                                                                                                                                                                                                                                                                                                                                  |  |  |  |           |  |  |  |                                    |  |  |  |                      |  |  |  |          |  |  |  |
| CHK'D                                                                                                                                                                                                                                                                                                                                                                                                  |  |  |  |           |  |  |  |                                    |  |  |  |                      |  |  |  |          |  |  |  |
| APPV'D                                                                                                                                                                                                                                                                                                                                                                                                 |  |  |  |           |  |  |  |                                    |  |  |  |                      |  |  |  |          |  |  |  |
| MFG                                                                                                                                                                                                                                                                                                                                                                                                    |  |  |  |           |  |  |  |                                    |  |  |  |                      |  |  |  |          |  |  |  |
| Q.A                                                                                                                                                                                                                                                                                                                                                                                                    |  |  |  |           |  |  |  |                                    |  |  |  |                      |  |  |  |          |  |  |  |
|                                                                                                                                                                                                                                                                                                                                                                                                        |  |  |  |           |  |  |  |                                    |  |  |  |                      |  |  |  |          |  |  |  |
|                                                                                                                                                                                                                                                                                                                                                                                                        |  |  |  |           |  |  |  |                                    |  |  |  |                      |  |  |  |          |  |  |  |
|                                                                                                                                                                                                                                                                                                                                                                                                        |  |  |  |           |  |  |  |                                    |  |  |  |                      |  |  |  |          |  |  |  |
| 4                                                                                                                                                                                                                                                                                                                                                                                                      |  |  |  | 3         |  |  |  | 2                                  |  |  |  | 1                    |  |  |  |          |  |  |  |
