# Supplementary material for: Construction and use of an adaptive optics two-photon microscope with direct wavefront sensing
Source: Springer Nature journal article supplement (doi:10.1038/s41596-023-00893-w), 2023-11-01
Supplement: MOESM2 [file 41596_2023_893_MOESM2_ESM.zip]

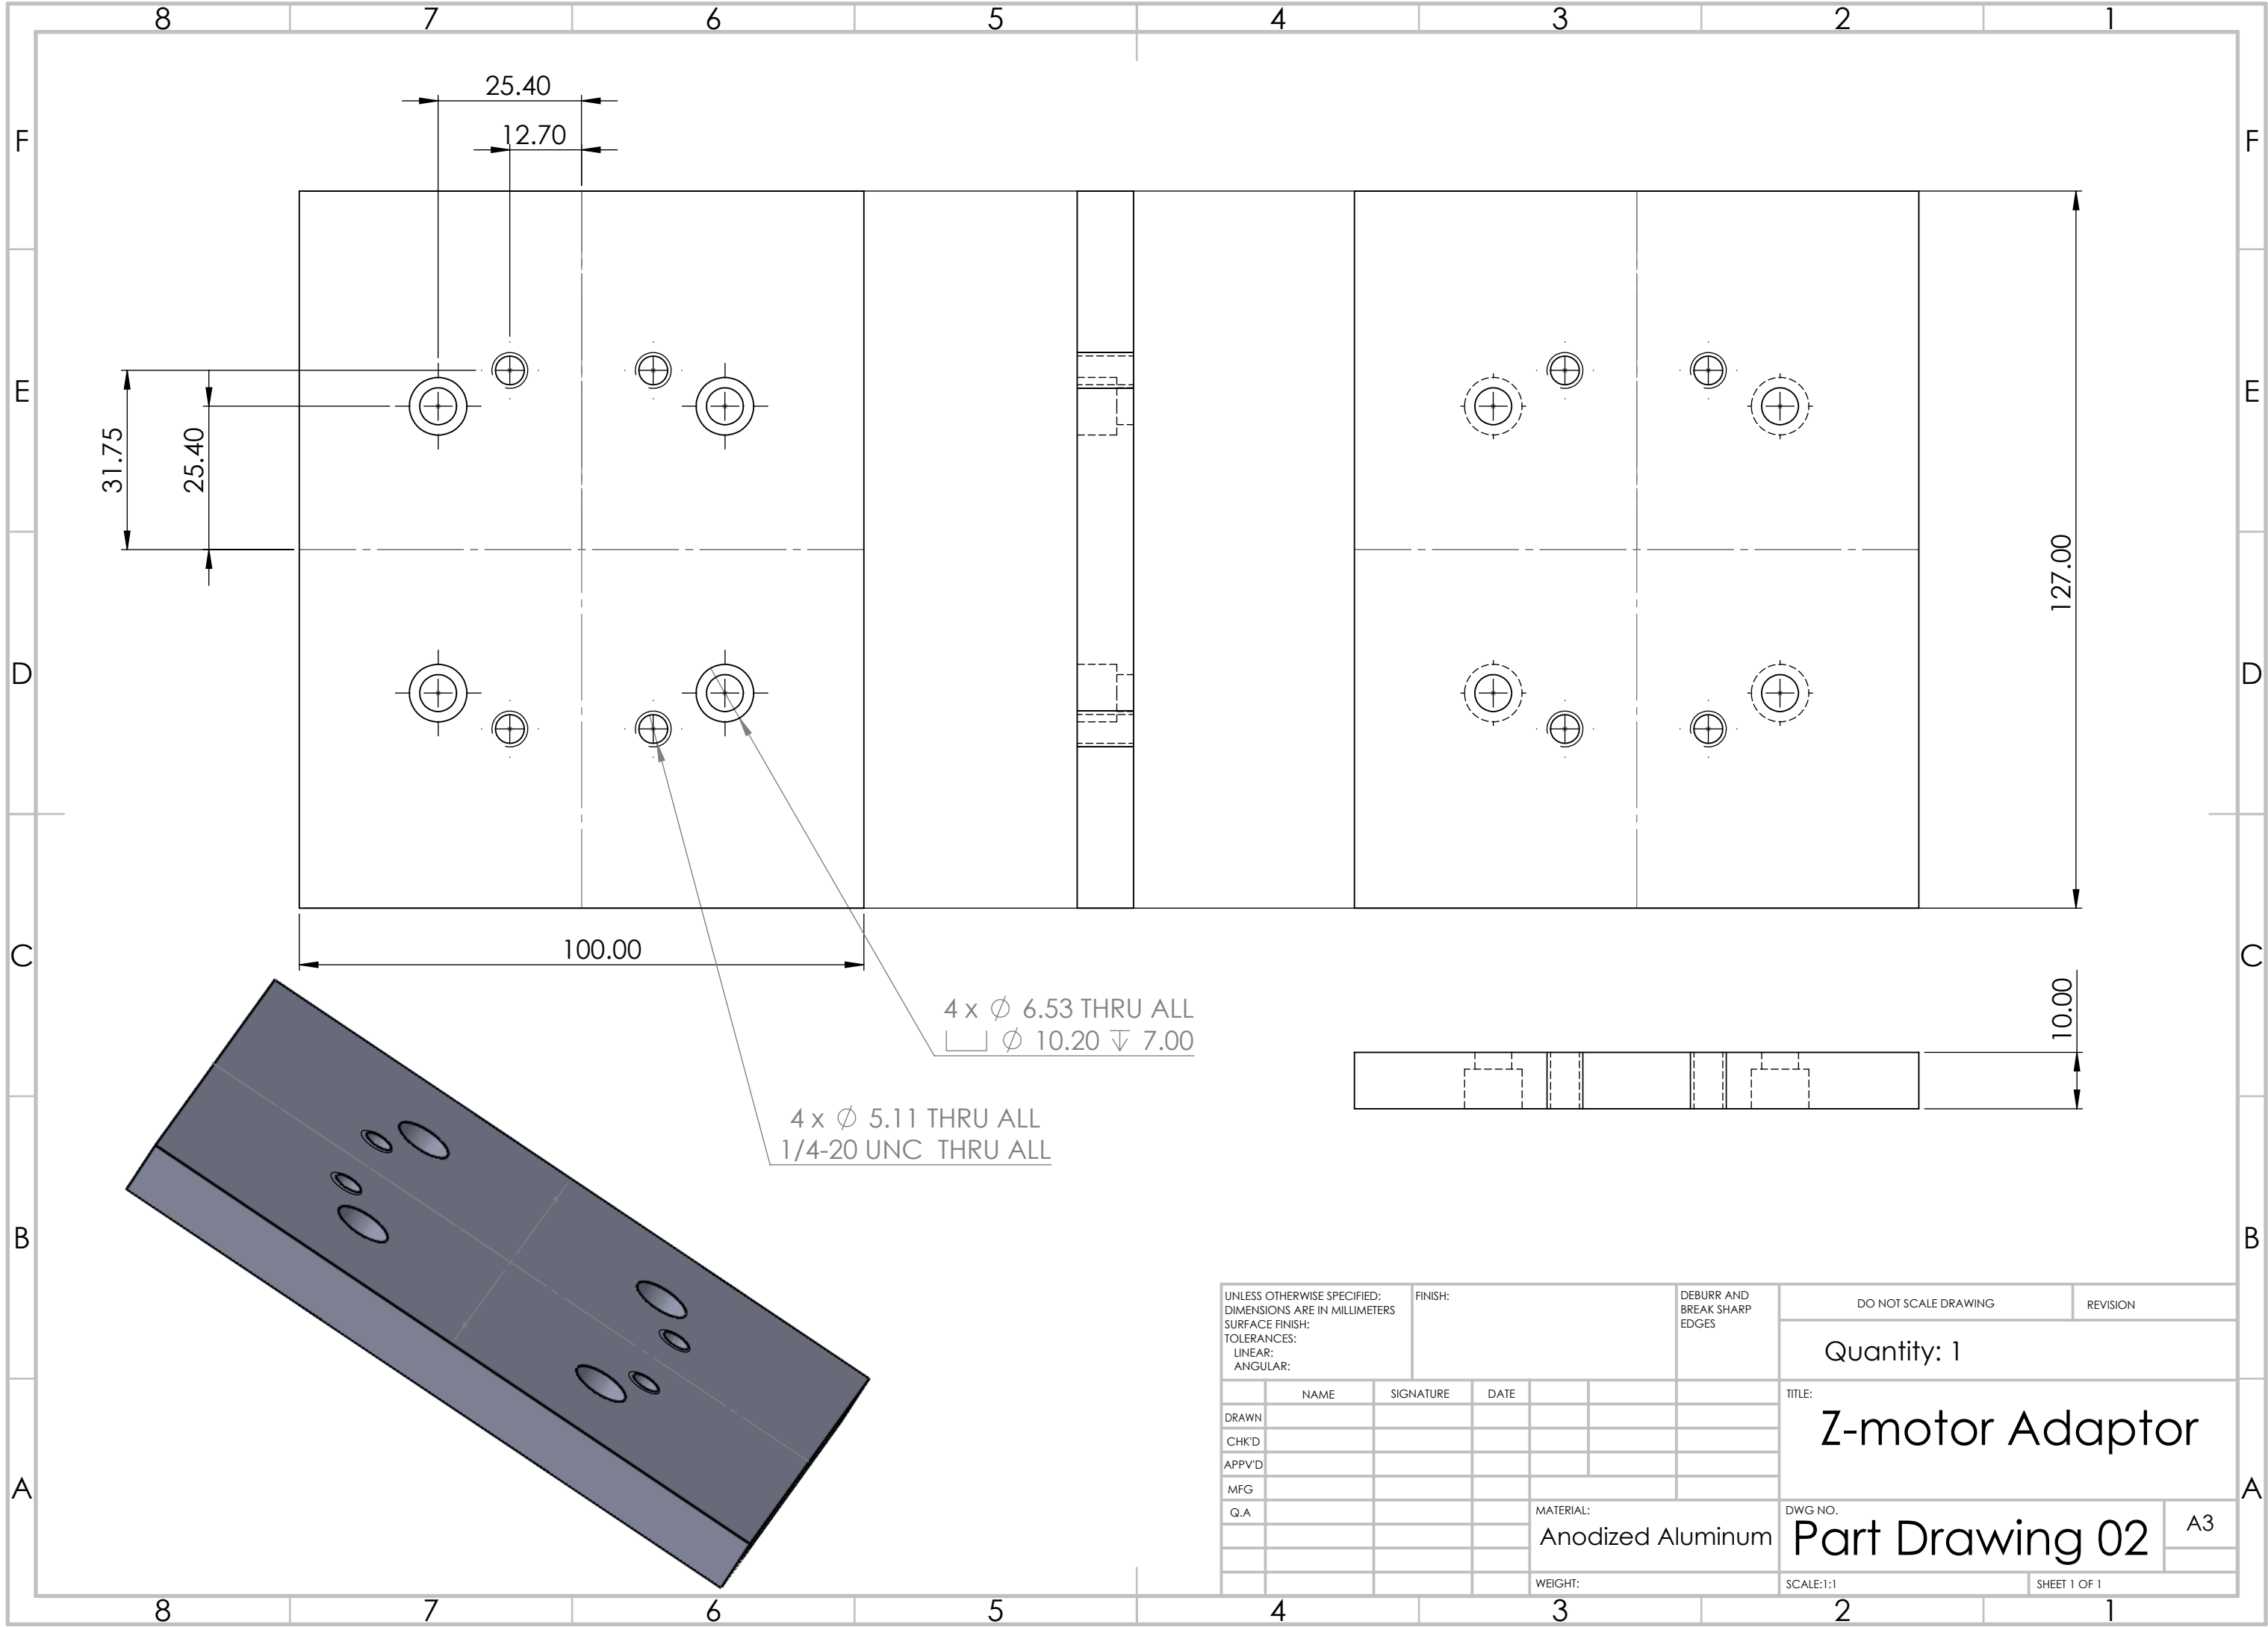

|                                                                                                                       |      |           |      |         |  |                                    |  |                               |  |          |
|-----------------------------------------------------------------------------------------------------------------------|------|-----------|------|---------|--|------------------------------------|--|-------------------------------|--|----------|
| UNLESS OTHERWISE SPECIFIED:<br>DIMENSIONS ARE IN MILLIMETERS<br>SURFACE FINISH:<br>TOLERANCES:<br>LINEAR:<br>ANGULAR: |      |           |      | FINISH: |  | DEBURR AND<br>BREAK SHARP<br>EDGES |  | DO NOT SCALE DRAWING          |  | REVISION |
|                                                                                                                       |      |           |      |         |  |                                    |  | Quantity: 1                   |  |          |
|                                                                                                                       | NAME | SIGNATURE | DATE |         |  |                                    |  | TITLE:<br><br>Z-motor Adaptor |  |          |
| DRAWN                                                                                                                 |      |           |      |         |  |                                    |  |                               |  |          |
| CHK'D                                                                                                                 |      |           |      |         |  |                                    |  |                               |  |          |
| APPV'D                                                                                                                |      |           |      |         |  |                                    |  |                               |  |          |
| MFG                                                                                                                   |      |           |      |         |  |                                    |  |                               |  |          |
| Q.A                                                                                                                   |      |           |      |         |  |                                    |  | DWG NO. Part Drawing 02       |  |          |
|                                                                                                                       |      |           |      |         |  |                                    |  | SCALE:1:1                     |  |          |
|                                                                                                                       |      |           |      |         |  |                                    |  | SHEET 1 OF 1                  |  |          |
|                                                                                                                       |      |           |      |         |  |                                    |  | A3                            |  |          |
