# Supplementary material for: Construction and use of an adaptive optics two-photon microscope with direct wavefront sensing
Source: Springer Nature journal article supplement (doi:10.1038/s41596-023-00893-w), 2023-11-01
Supplement: MOESM2 [file 41596_2023_893_MOESM2_ESM.zip]

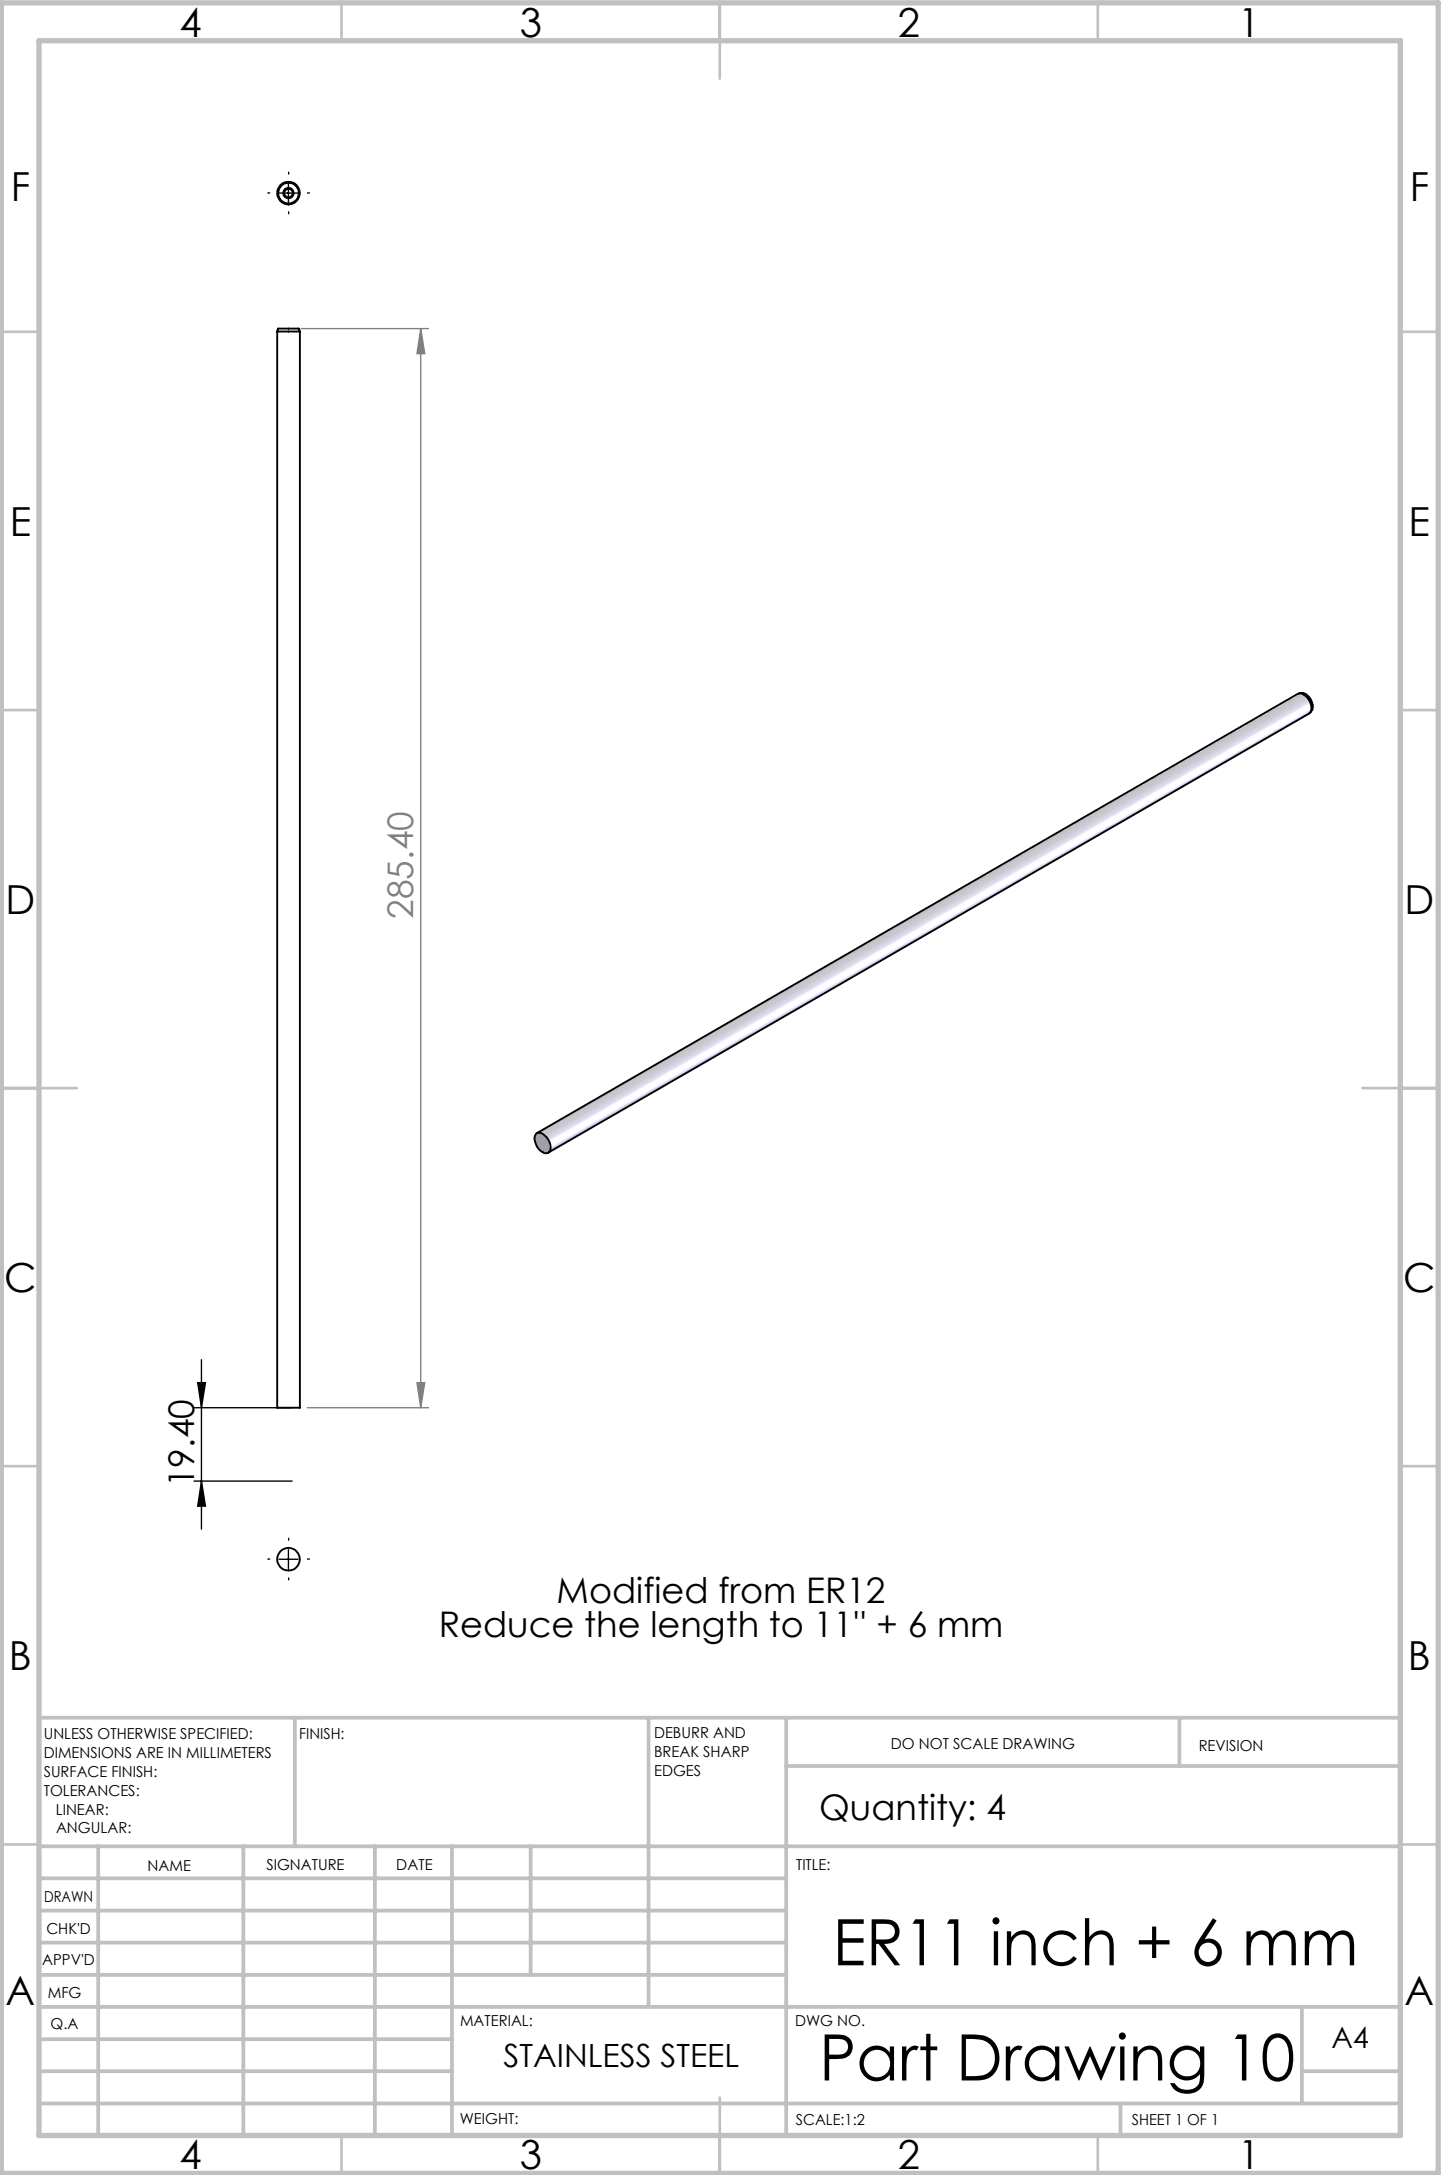

Modified from ER12  
Reduce the length to 11" + 6 mm

UNLESS OTHERWISE SPECIFIED:  
DIMENSIONS ARE IN MILLIMETERS  
SURFACE FINISH:  
TOLERANCES:  
LINEAR:  
ANGULAR:

FINISH:

DEBURR AND  
BREAK SHARP  
EDGES

DO NOT SCALE DRAWING

REVISION

Quantity: 4

TITLE:

ER11 inch + 6 mm

DWG NO.

Part Drawing 10

A4

MATERIAL:

STAINLESS STEEL

WEIGHT:

SCALE:1:2

SHEET 1 OF 1
