# Supplementary material for: Construction and use of an adaptive optics two-photon microscope with direct wavefront sensing
Source: Springer Nature journal article supplement (doi:10.1038/s41596-023-00893-w), 2023-11-01
Supplement: MOESM2 [file 41596_2023_893_MOESM2_ESM.zip]

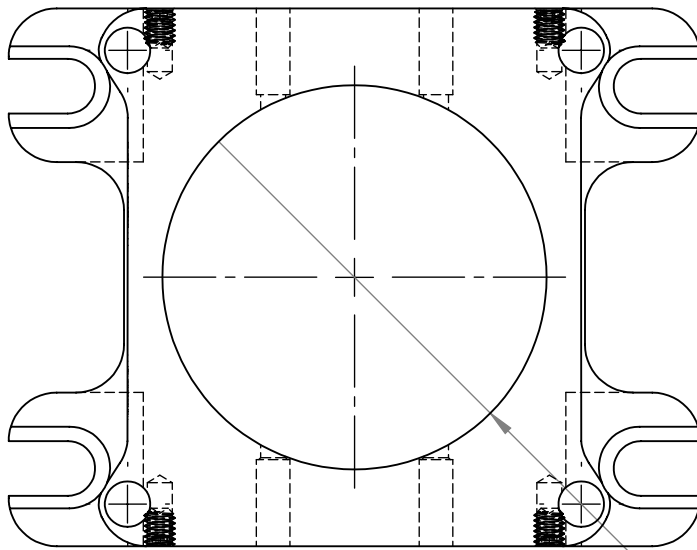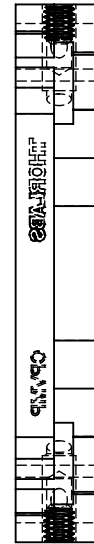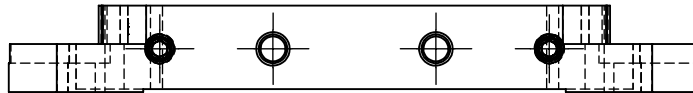

Ø 50.80 THRU

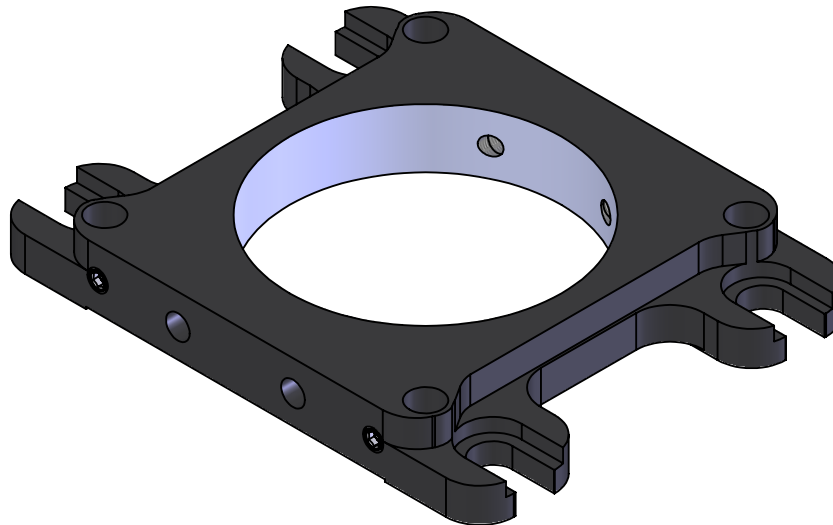

Modified from Thorlabs, CPVMP  
Enlarge the center hole

UNLESS OTHERWISE SPECIFIED:  
DIMENSIONS ARE IN MILLIMETERS  
SURFACE FINISH:  
TOLERANCES:  
LINEAR:  
ANGULAR:

FINISH:

DEBURR AND  
BREAK SHARP  
EDGES

DO NOT SCALE DRAWING

REVISION

Quantity: 1

TITLE:

Vertical Mounting  
Plate (Modified)

DWG NO.

Part Drawing 09

A4

MATERIAL:

Anodized Aluminum

WEIGHT:

SCALE:1:2

SHEET 1 OF 1

|        | NAME | SIGNATURE | DATE |  |
|--------|------|-----------|------|--|
| DRAWN  |      |           |      |  |
| CHK'D  |      |           |      |  |
| APPV'D |      |           |      |  |
| MFG    |      |           |      |  |
| Q.A    |      |           |      |  |
