# Supplementary material for: Construction and use of an adaptive optics two-photon microscope with direct wavefront sensing
Source: Springer Nature journal article supplement (doi:10.1038/s41596-023-00893-w), 2023-11-01
Supplement: MOESM2 [file 41596_2023_893_MOESM2_ESM.zip]

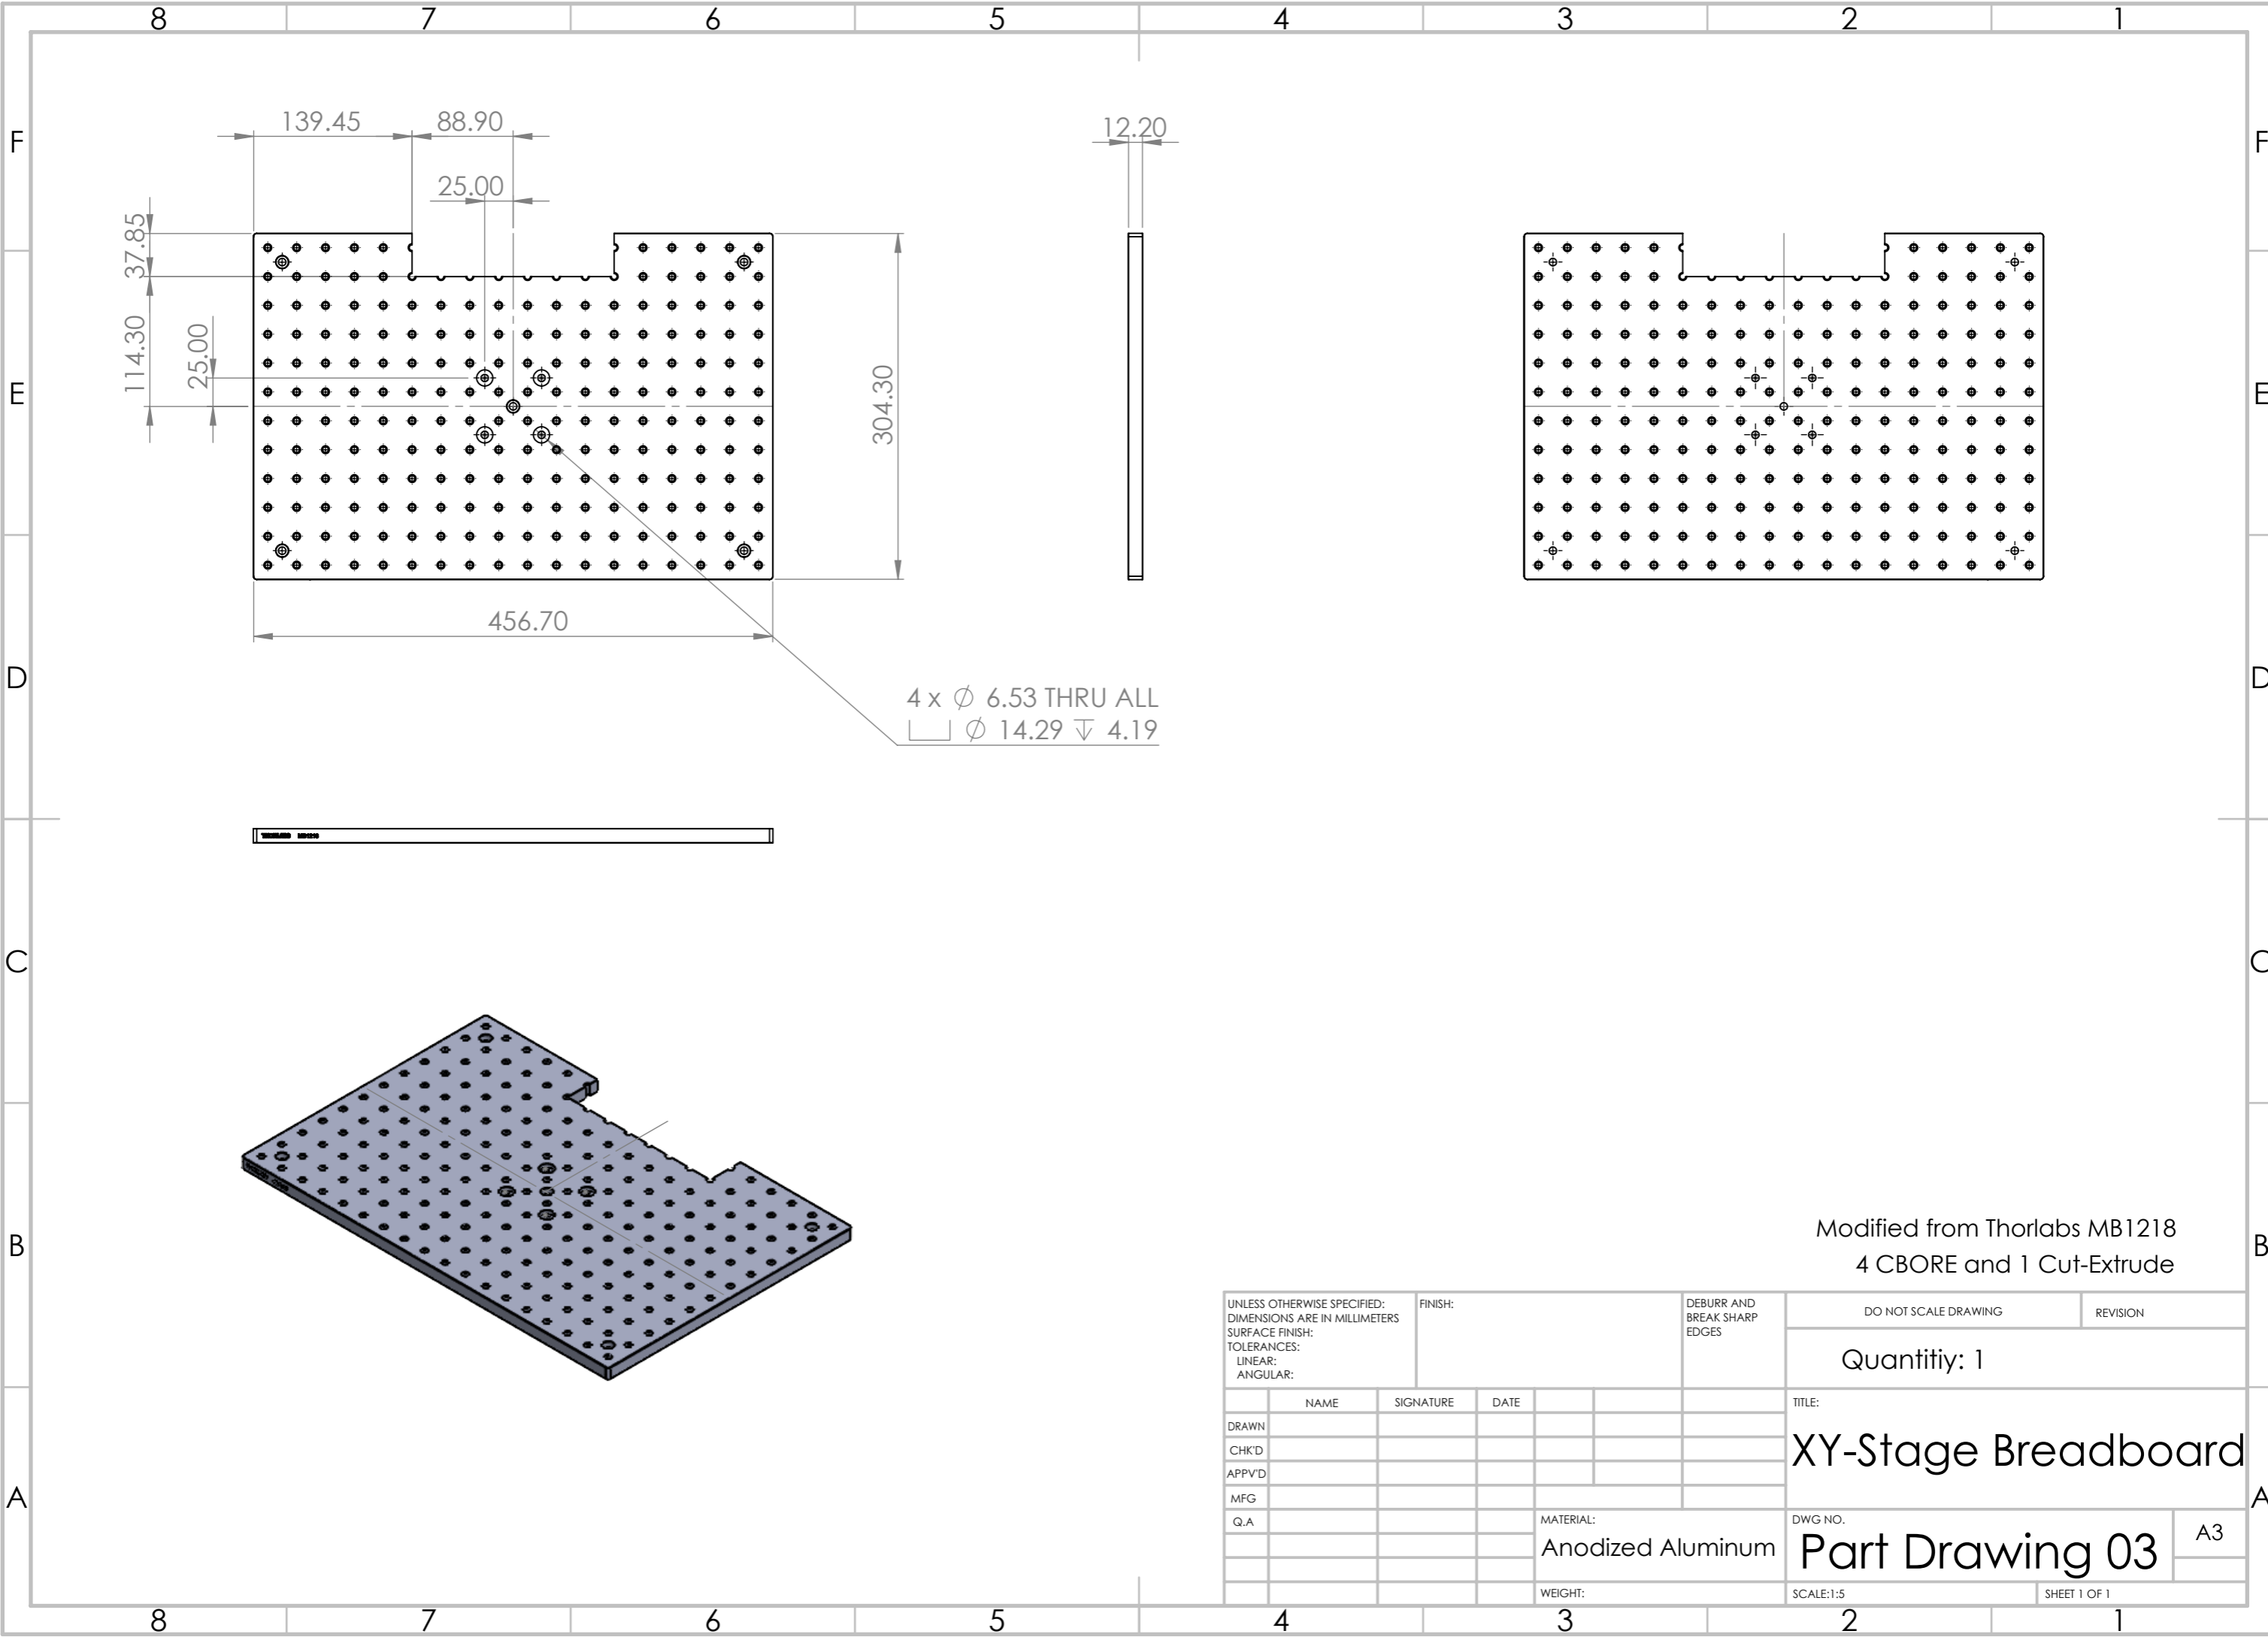

4 x Ø 6.53 THRU ALL  
□ Ø 14.29 ∇ 4.19

Modified from Thorlabs MB1218  
4 CBORE and 1 Cut-Extrude

|                                                                                                                       |      |           |      |         |  |                                    |                                   |  |          |
|-----------------------------------------------------------------------------------------------------------------------|------|-----------|------|---------|--|------------------------------------|-----------------------------------|--|----------|
| UNLESS OTHERWISE SPECIFIED:<br>DIMENSIONS ARE IN MILLIMETERS<br>SURFACE FINISH:<br>TOLERANCES:<br>LINEAR:<br>ANGULAR: |      |           |      | FINISH: |  | DEBURR AND<br>BREAK SHARP<br>EDGES | DO NOT SCALE DRAWING              |  | REVISION |
|                                                                                                                       |      |           |      |         |  |                                    | Quantity: 1                       |  |          |
|                                                                                                                       | NAME | SIGNATURE | DATE |         |  |                                    | TITLE:<br><br>XY-Stage Breadboard |  |          |
| DRAWN                                                                                                                 |      |           |      |         |  |                                    |                                   |  |          |
| CHK'D                                                                                                                 |      |           |      |         |  |                                    | DWG NO.<br><br>Part Drawing 03    |  |          |
| APPV'D                                                                                                                |      |           |      |         |  |                                    |                                   |  |          |
| MFG                                                                                                                   |      |           |      |         |  |                                    | SCALE:1:5                         |  |          |
| Q.A                                                                                                                   |      |           |      |         |  |                                    |                                   |  |          |
|                                                                                                                       |      |           |      |         |  | MATERIAL:<br><br>Anodized Aluminum | SHEET 1 OF 1                      |  |          |
|                                                                                                                       |      |           |      |         |  |                                    |                                   |  |          |
|                                                                                                                       |      |           |      |         |  | WEIGHT:                            |                                   |  |          |

A3
