# Supplementary material for: Construction and use of an adaptive optics two-photon microscope with direct wavefront sensing
Source: Springer Nature journal article supplement (doi:10.1038/s41596-023-00893-w), 2023-11-01
Supplement: MOESM2 [file 41596_2023_893_MOESM2_ESM.zip]

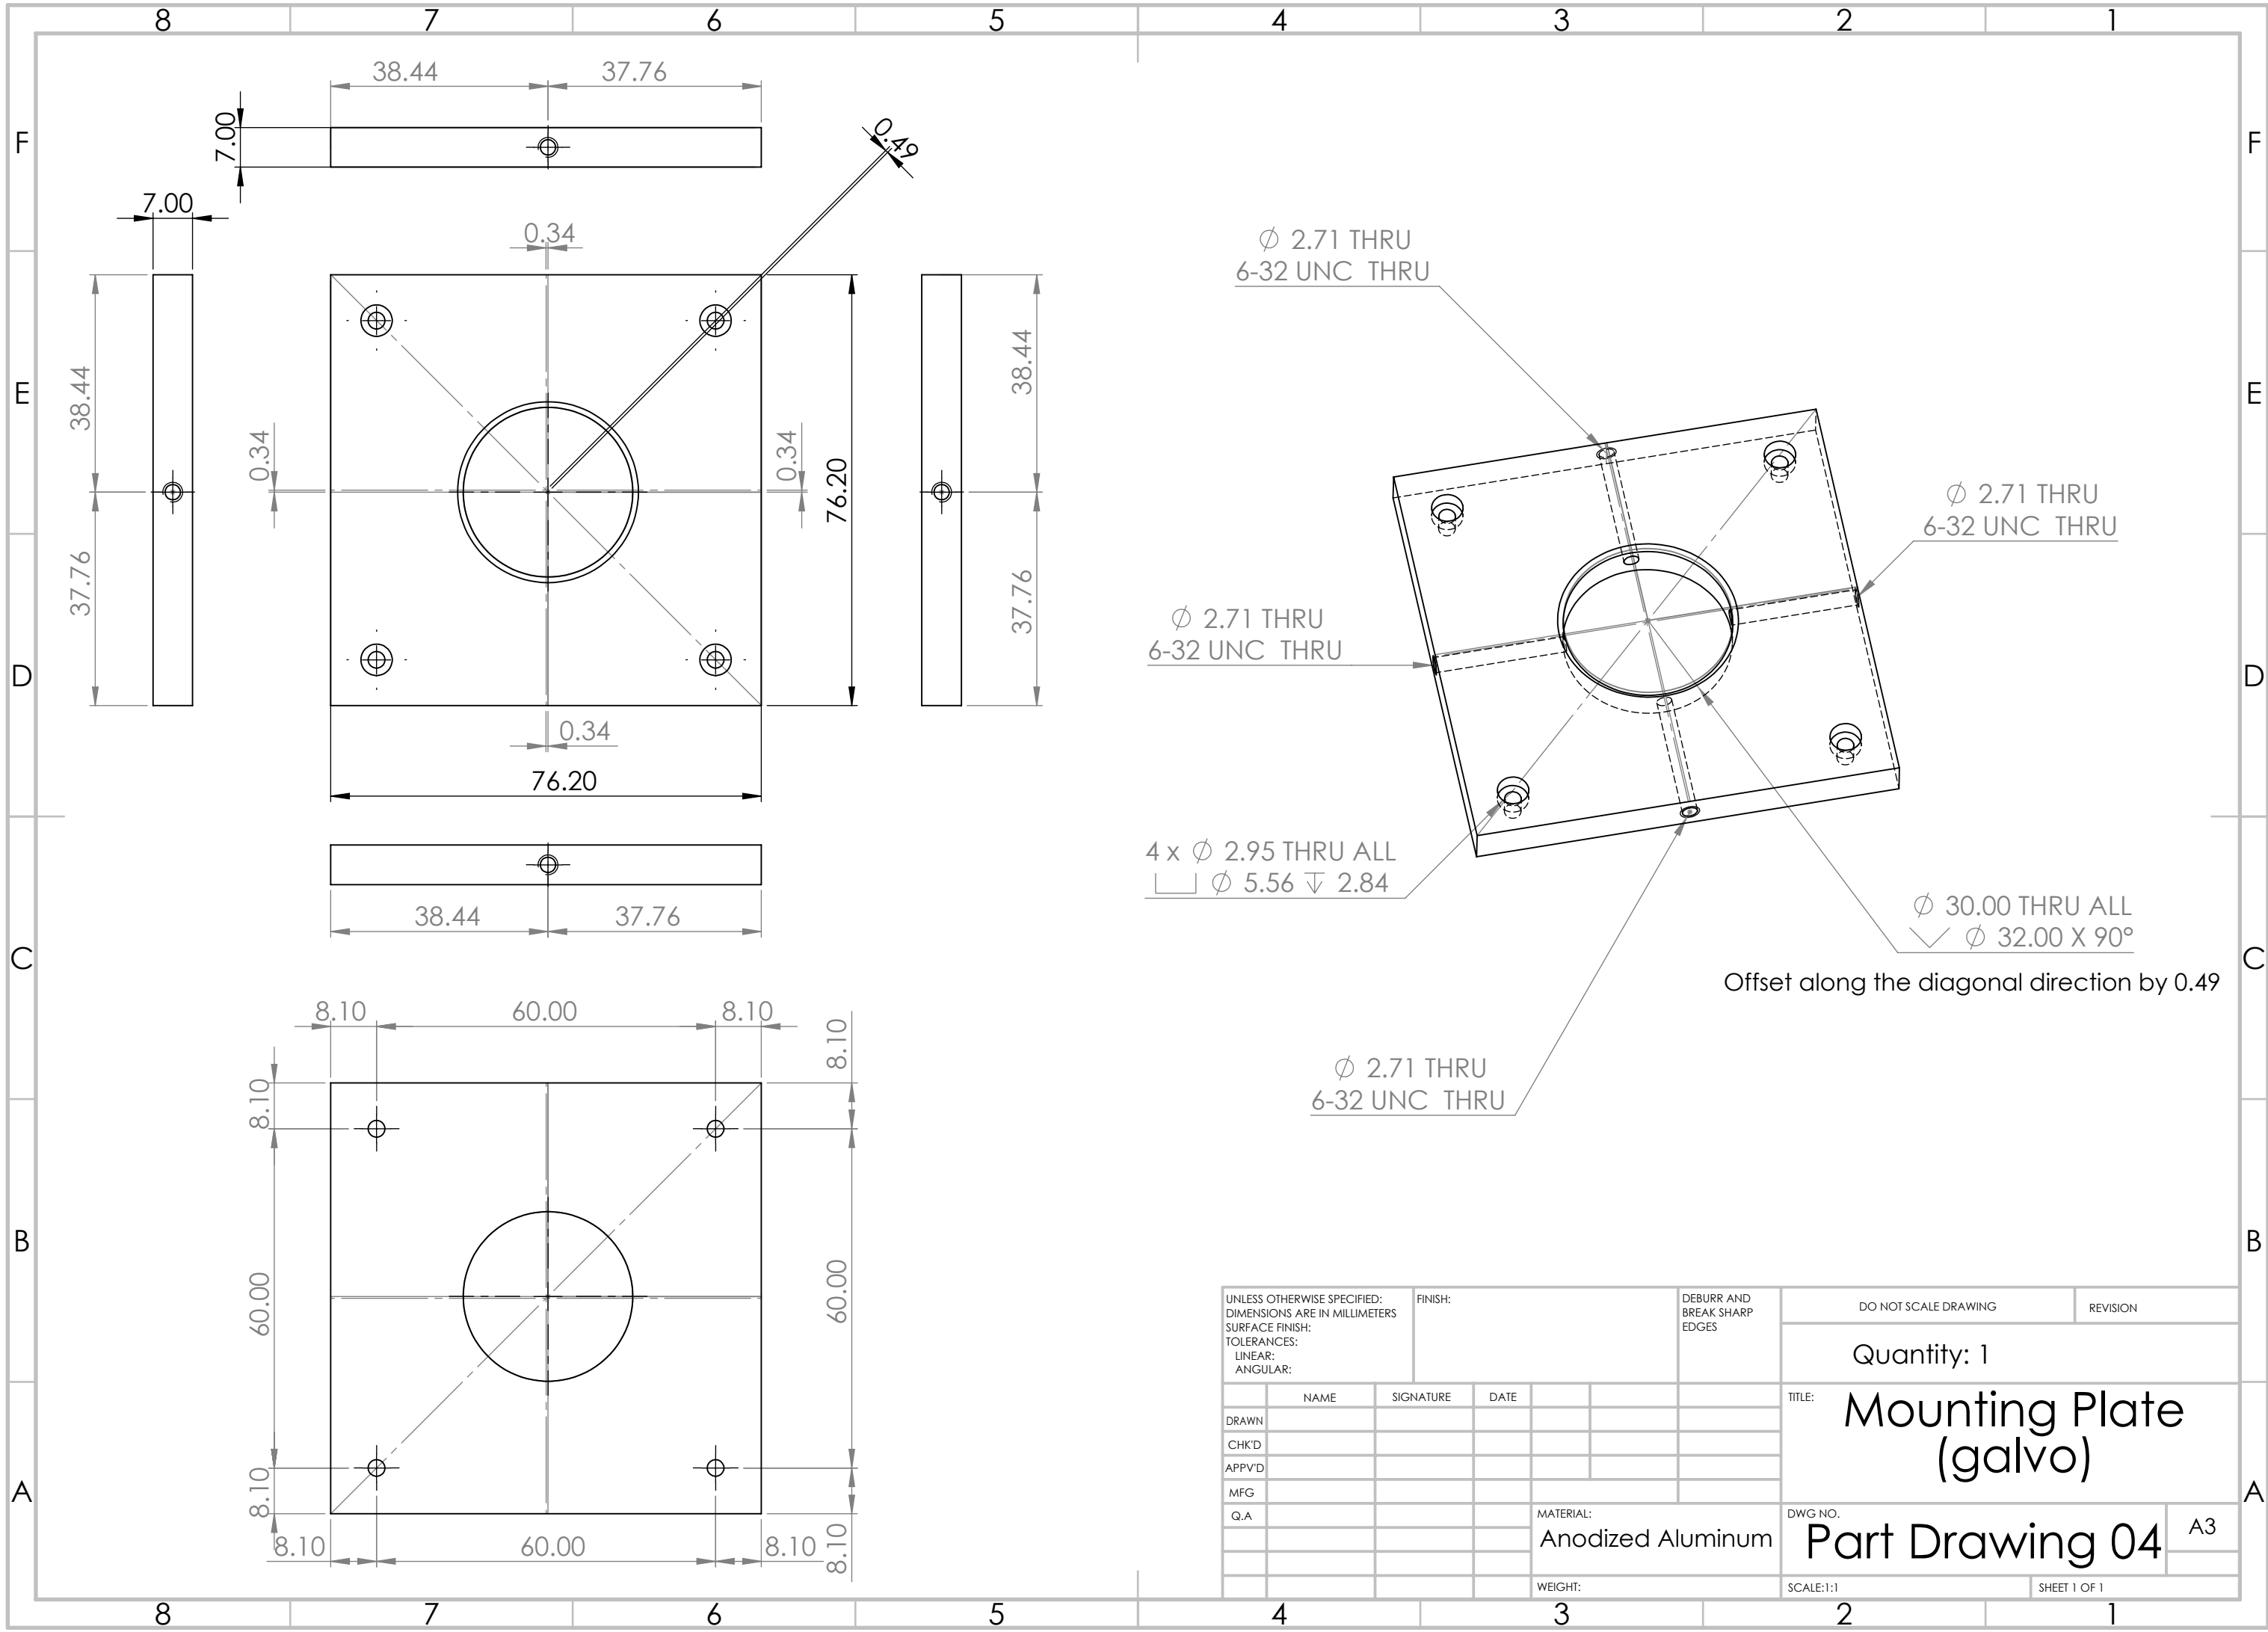

|                                                                                                                       |      |  |           |  |      |                                    |  |                                    |  |                      |                                         |              |  |
|-----------------------------------------------------------------------------------------------------------------------|------|--|-----------|--|------|------------------------------------|--|------------------------------------|--|----------------------|-----------------------------------------|--------------|--|
| UNLESS OTHERWISE SPECIFIED:<br>DIMENSIONS ARE IN MILLIMETERS<br>SURFACE FINISH:<br>TOLERANCES:<br>LINEAR:<br>ANGULAR: |      |  |           |  |      | FINISH:                            |  | DEBURR AND<br>BREAK SHARP<br>EDGES |  | DO NOT SCALE DRAWING |                                         | REVISION     |  |
|                                                                                                                       |      |  |           |  |      |                                    |  |                                    |  | Quantity: 1          |                                         |              |  |
|                                                                                                                       | NAME |  | SIGNATURE |  | DATE |                                    |  |                                    |  |                      | TITLE:<br><br>Mounting Plate<br>(galvo) |              |  |
| DRAWN                                                                                                                 |      |  |           |  |      |                                    |  |                                    |  |                      |                                         |              |  |
| CHK'D                                                                                                                 |      |  |           |  |      |                                    |  |                                    |  |                      |                                         |              |  |
| APP'VD                                                                                                                |      |  |           |  |      |                                    |  |                                    |  |                      |                                         |              |  |
| MFG                                                                                                                   |      |  |           |  |      |                                    |  |                                    |  |                      |                                         |              |  |
| Q.A                                                                                                                   |      |  |           |  |      |                                    |  |                                    |  |                      |                                         |              |  |
|                                                                                                                       |      |  |           |  |      | MATERIAL:<br><br>Anodized Aluminum |  | DWG NO.                            |  |                      |                                         | A3           |  |
|                                                                                                                       |      |  |           |  |      |                                    |  | Part Drawing 04                    |  |                      |                                         |              |  |
|                                                                                                                       |      |  |           |  |      |                                    |  |                                    |  |                      |                                         |              |  |
|                                                                                                                       |      |  |           |  |      |                                    |  |                                    |  |                      |                                         |              |  |
|                                                                                                                       |      |  |           |  |      | WEIGHT:                            |  | SCALE: 1:1                         |  |                      |                                         | SHEET 1 OF 1 |  |
