# Supplementary material for: Construction and use of an adaptive optics two-photon microscope with direct wavefront sensing
Source: Springer Nature journal article supplement (doi:10.1038/s41596-023-00893-w), 2023-11-01
Supplement: MOESM2 [file 41596_2023_893_MOESM2_ESM.zip]

4 3 2 1

F F

E E

D D

C C

B B

A A

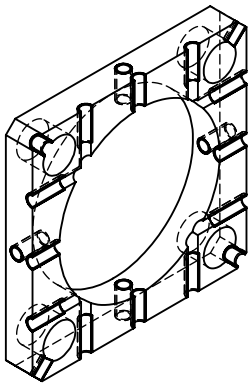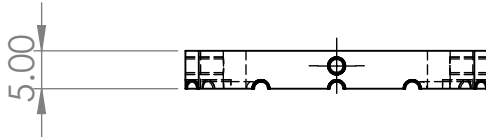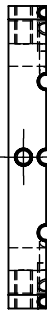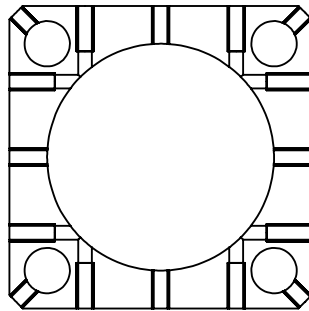

Modified from LINOS Microbench, G061042000  
Thickness : 10 mm → 5 mm

|                                                                                                                       |  |  |  |         |  |                                    |  |                      |  |                            |  |              |
|-----------------------------------------------------------------------------------------------------------------------|--|--|--|---------|--|------------------------------------|--|----------------------|--|----------------------------|--|--------------|
| UNLESS OTHERWISE SPECIFIED:<br>DIMENSIONS ARE IN MILLIMETERS<br>SURFACE FINISH:<br>TOLERANCES:<br>LINEAR:<br>ANGULAR: |  |  |  | FINISH: |  | DEBURR AND<br>BREAK SHARP<br>EDGES |  | DO NOT SCALE DRAWING |  | REVISION                   |  |              |
|                                                                                                                       |  |  |  |         |  |                                    |  | Quantity: 1          |  |                            |  |              |
| TITLE:<br><h1>L11 Mounting Plate</h1>                                                                                 |  |  |  |         |  |                                    |  |                      |  |                            |  |              |
| MATERIAL:<br>Anodized Aluminum                                                                                        |  |  |  |         |  |                                    |  |                      |  | DWG NO.<br>Part Drawing 17 |  | A4           |
| WEIGHT:                                                                                                               |  |  |  |         |  |                                    |  |                      |  | SCALE:1:1                  |  | SHEET 1 OF 1 |

|        |      |           |      |  |  |  |  |  |  |  |  |
|--------|------|-----------|------|--|--|--|--|--|--|--|--|
|        | NAME | SIGNATURE | DATE |  |  |  |  |  |  |  |  |
| DRAWN  |      |           |      |  |  |  |  |  |  |  |  |
| CHK'D  |      |           |      |  |  |  |  |  |  |  |  |
| APPV'D |      |           |      |  |  |  |  |  |  |  |  |
| MFG    |      |           |      |  |  |  |  |  |  |  |  |
| Q.A    |      |           |      |  |  |  |  |  |  |  |  |

4 3 2 1
