# Supplementary material for: Construction and use of an adaptive optics two-photon microscope with direct wavefront sensing
Source: Springer Nature journal article supplement (doi:10.1038/s41596-023-00893-w), 2023-11-01
Supplement: MOESM2 [file 41596_2023_893_MOESM2_ESM.zip]

4 3 2 1

F

F

LINOS Microbench, G063731000

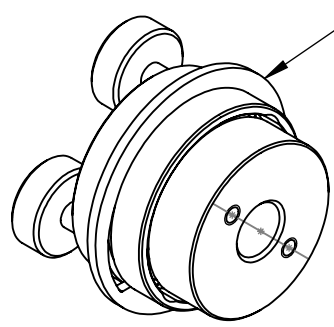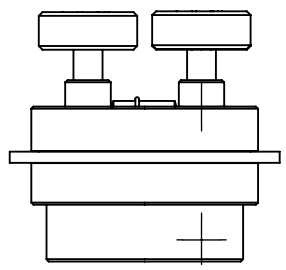

E

E

2 x  $\phi$  2.26  $\nabla$  8.00  
4-40 UNC  $\nabla$  5.69

D

D

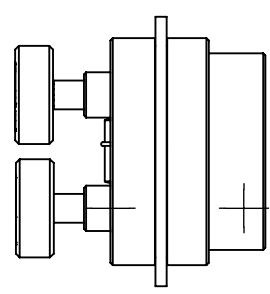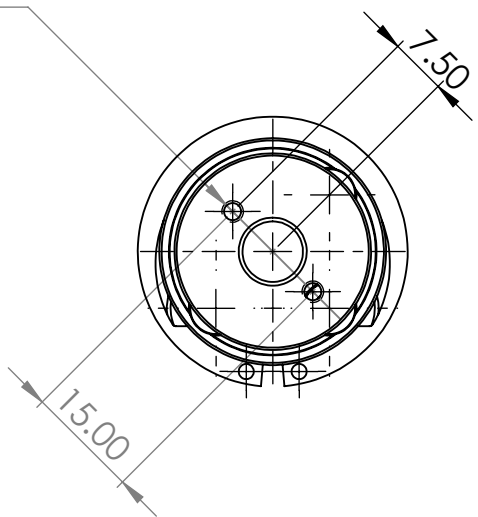

C

C

Modified from LINOS Microbench, G063731000  
Add 2 tapped holes

B

B

UNLESS OTHERWISE SPECIFIED:  
DIMENSIONS ARE IN MILLIMETERS  
SURFACE FINISH:  
TOLERANCES:  
LINEAR:  
ANGULAR:

FINISH:

DEBURR AND  
BREAK SHARP  
EDGES

DO NOT SCALE DRAWING

REVISION

Quantity: 4

A

A

|        | NAME | SIGNATURE | DATE |  |  |
|--------|------|-----------|------|--|--|
| DRAWN  |      |           |      |  |  |
| CHK'D  |      |           |      |  |  |
| APPV'D |      |           |      |  |  |
| MFG    |      |           |      |  |  |
| Q.A    |      |           |      |  |  |
|        |      |           |      |  |  |
|        |      |           |      |  |  |
|        |      |           |      |  |  |
|        |      |           |      |  |  |

MATERIAL:  
Anodized Aluminum

WEIGHT:

TITLE:  
Adjustable Prism  
Insert (Modified)

DWG NO.  
Part Drawing 16

A4

SCALE:1:1

SHEET 1 OF 1

4 3 2 1
