# Supplementary figures and images for: Construction and use of an adaptive optics two-photon microscope with direct wavefront sensing
Source: Springer Nature journal article supplement (doi:10.1038/s41596-023-00893-w), 2023-11-01

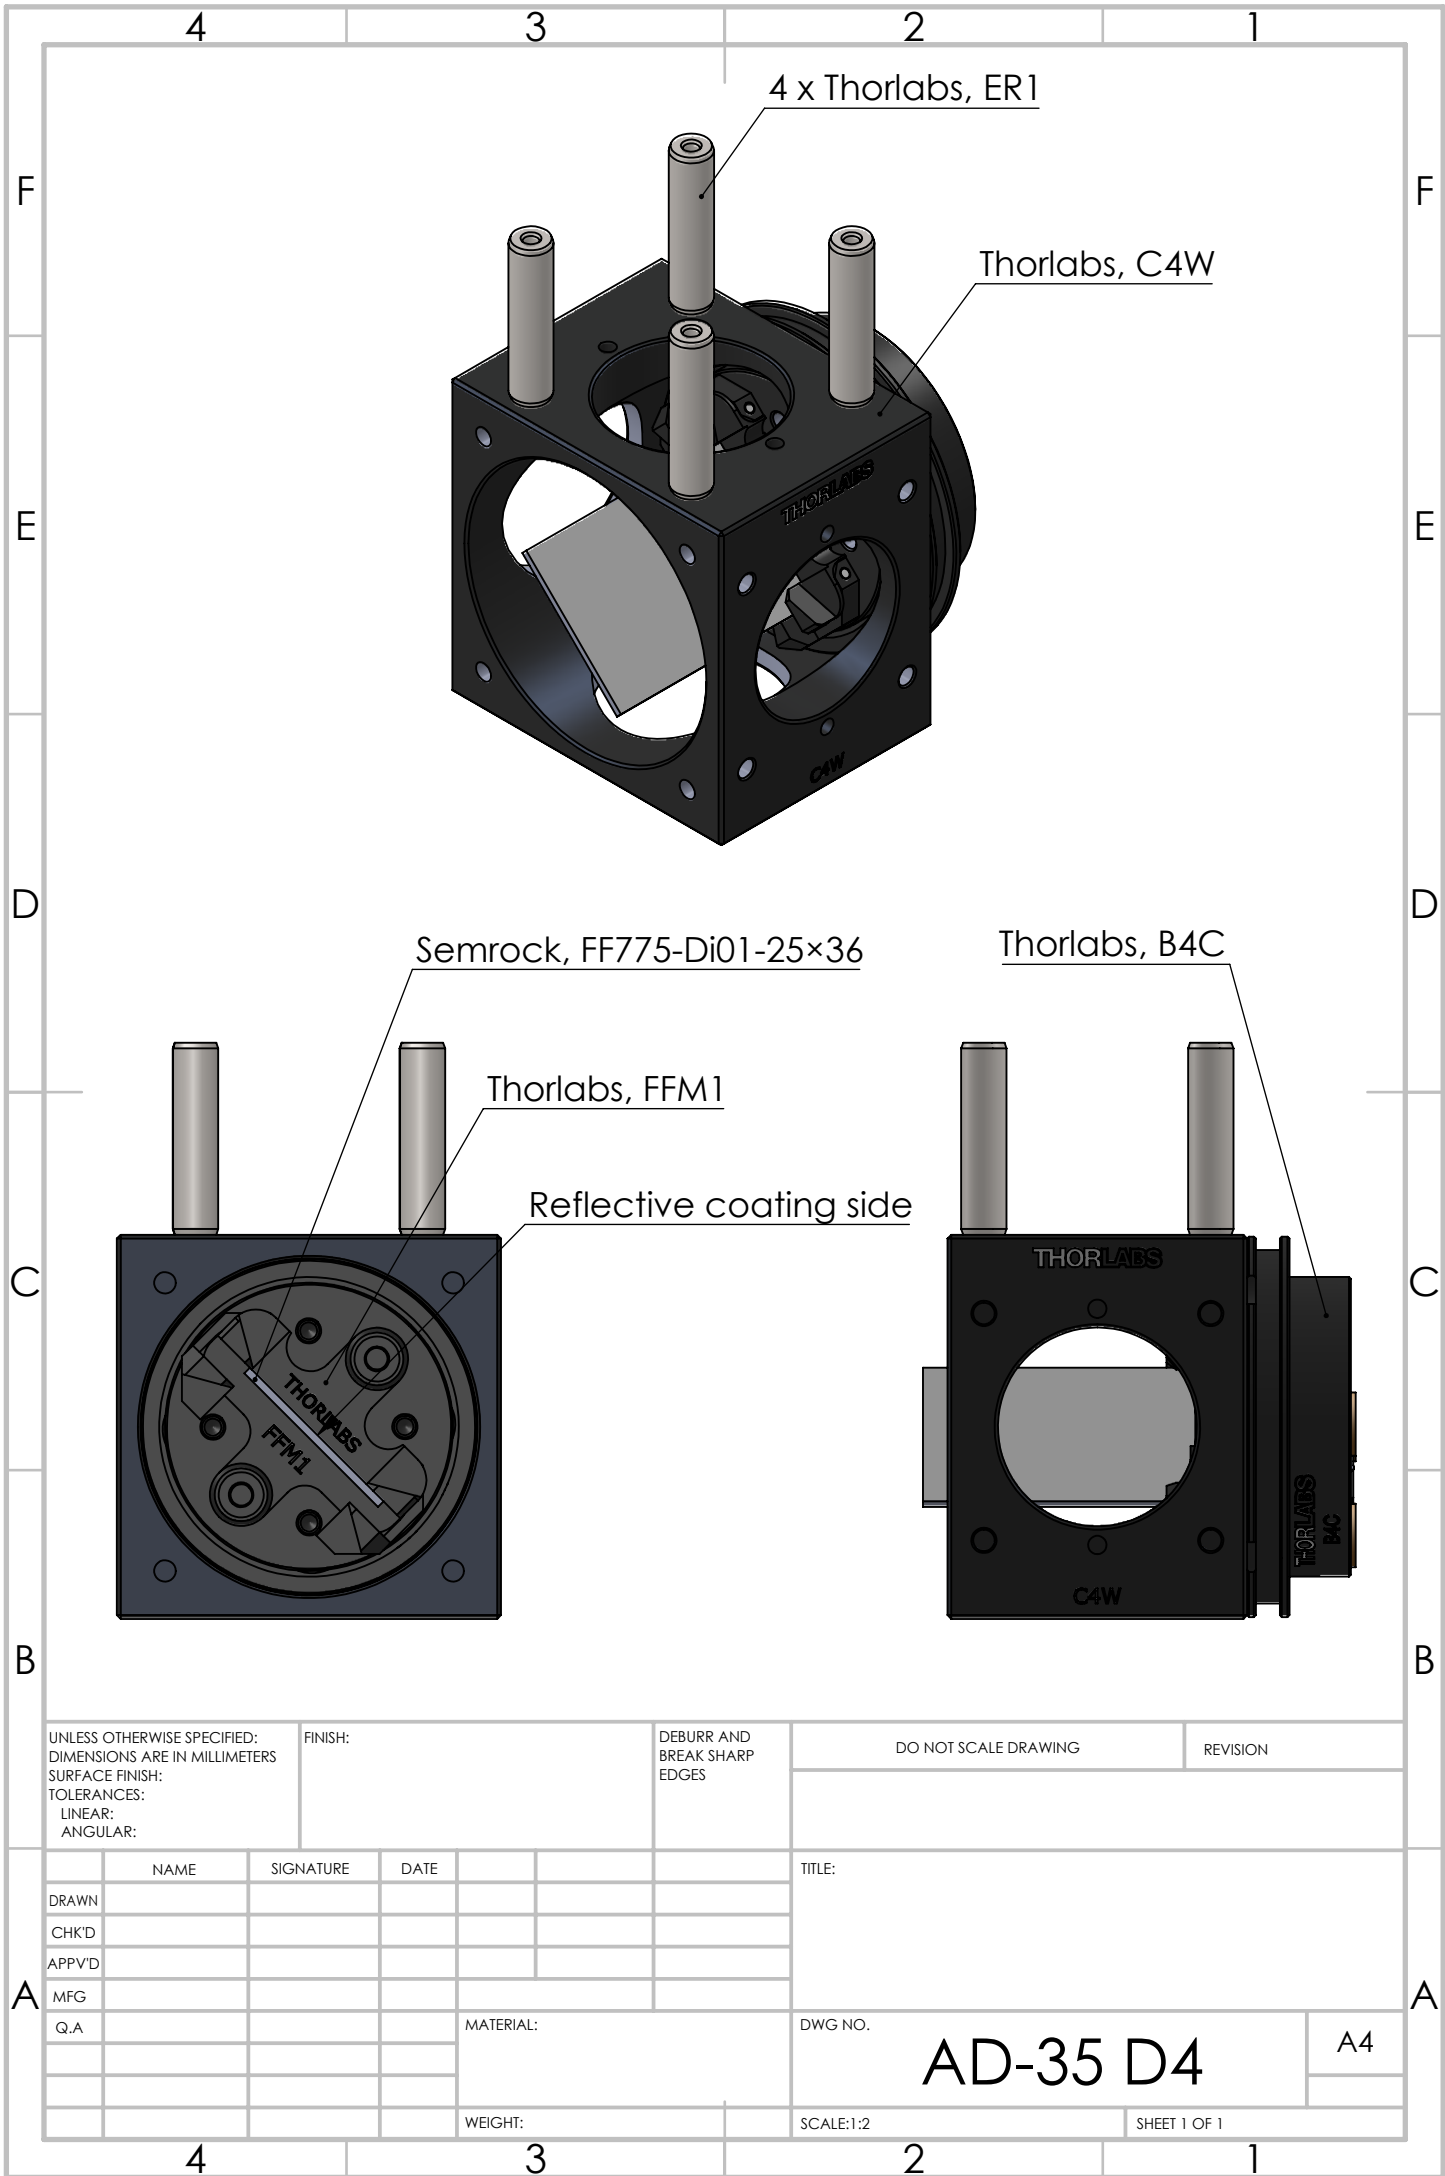

Supplement: MOESM1 [file 41596_2023_893_MOESM1_ESM.zip]

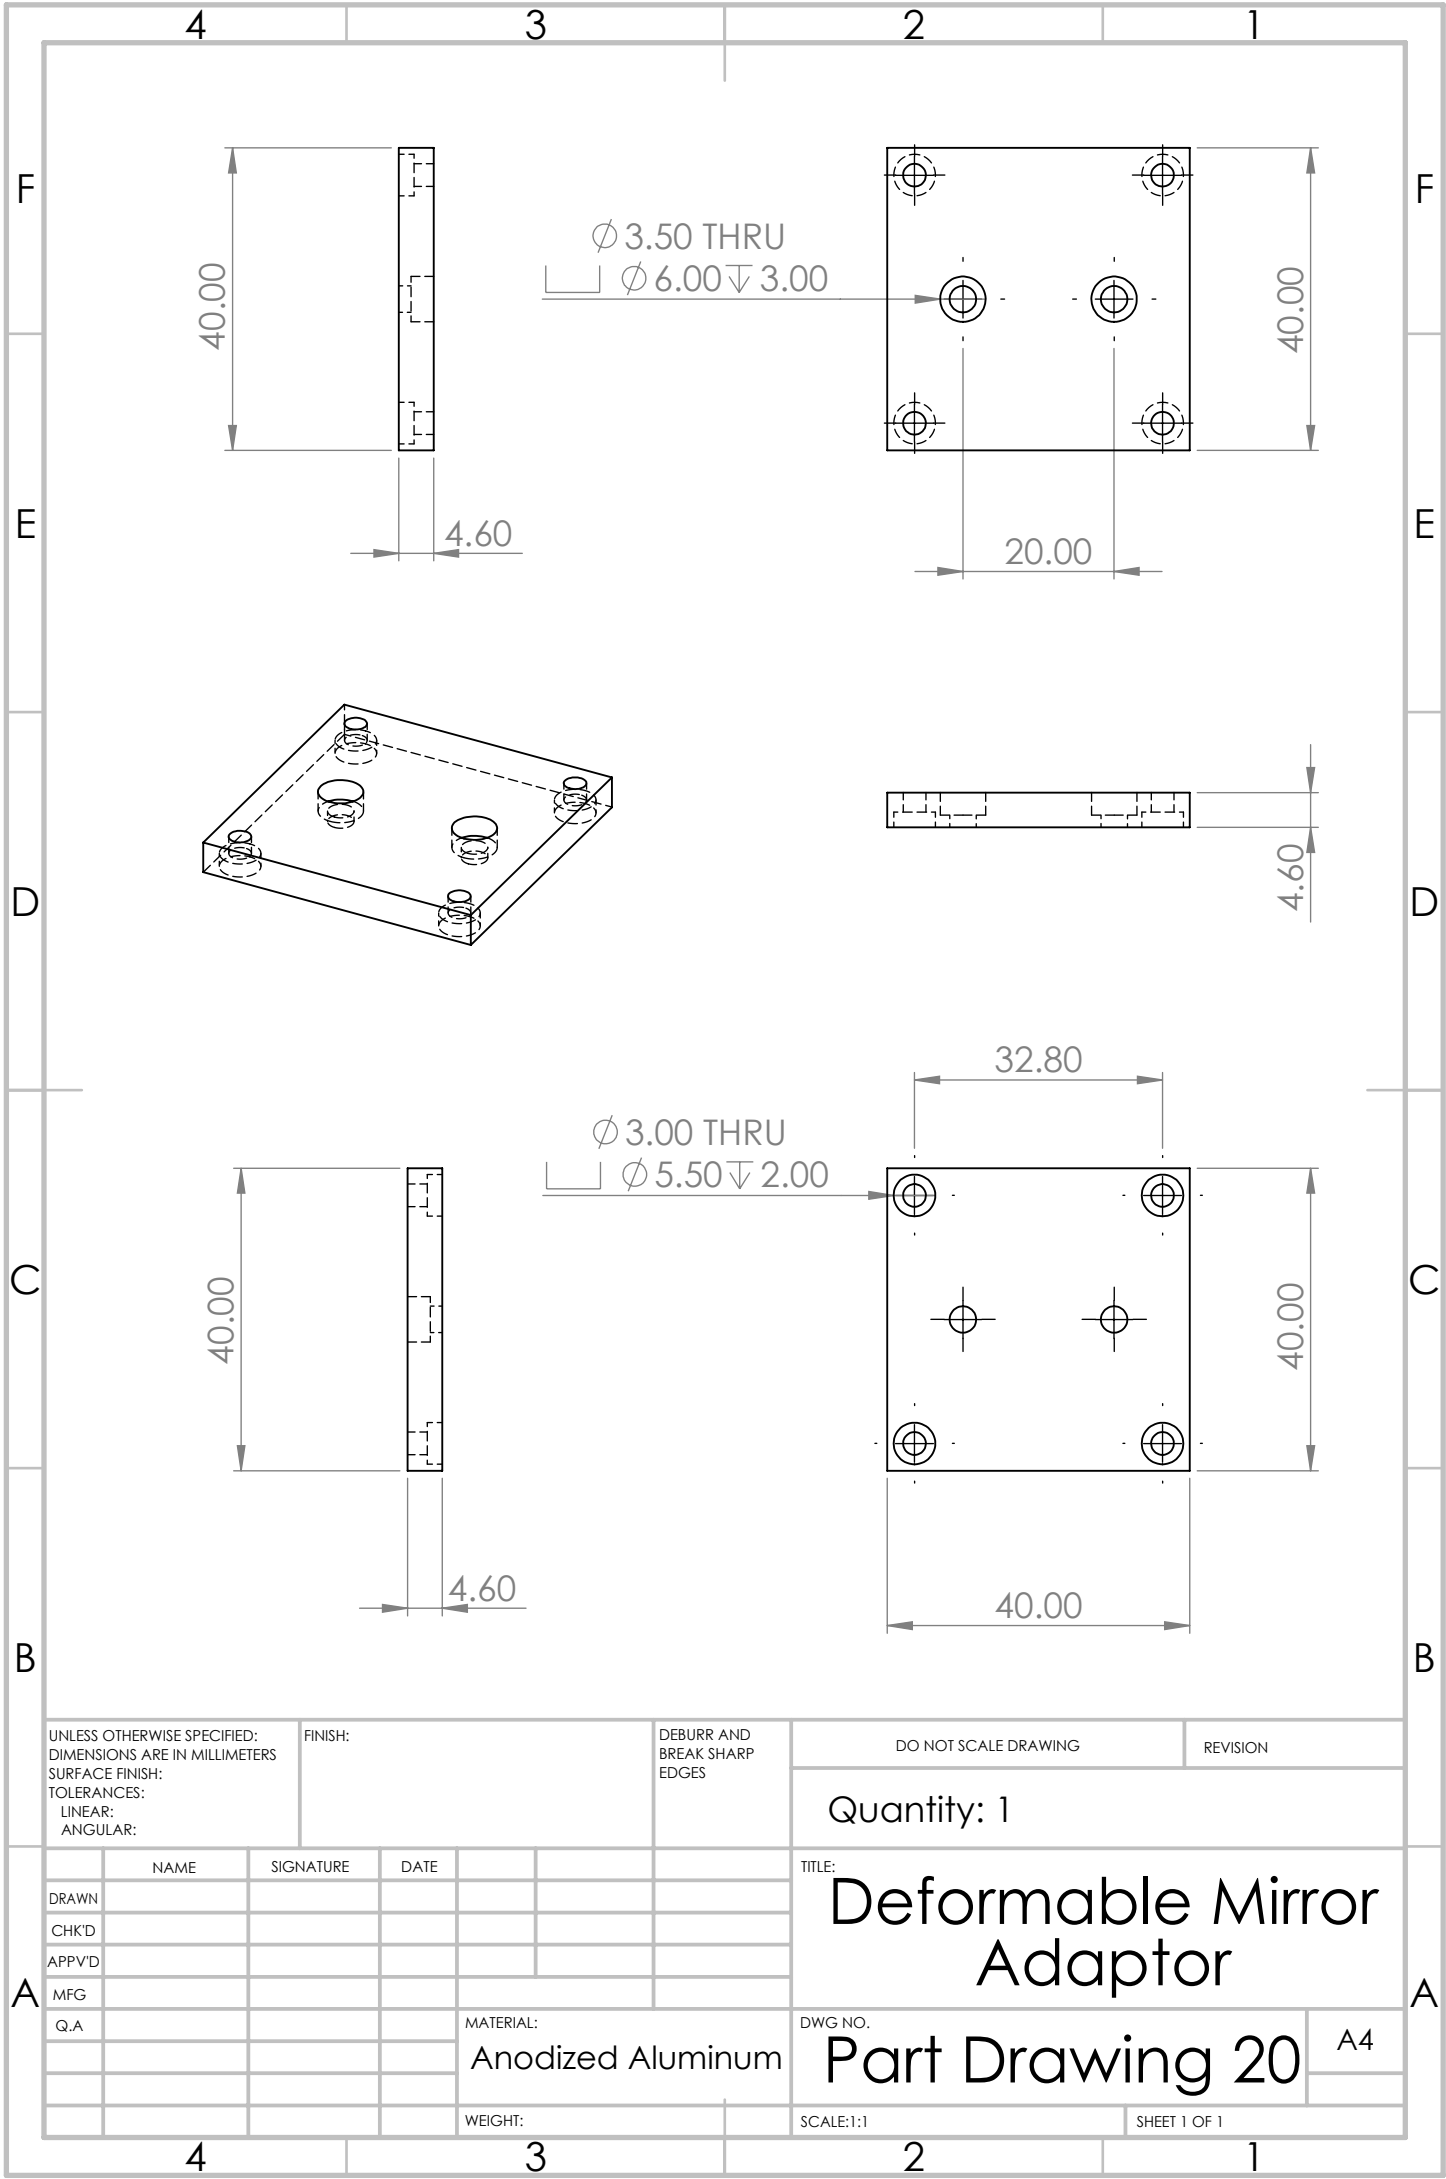

Supplement: MOESM2 [file 41596_2023_893_MOESM2_ESM.zip]

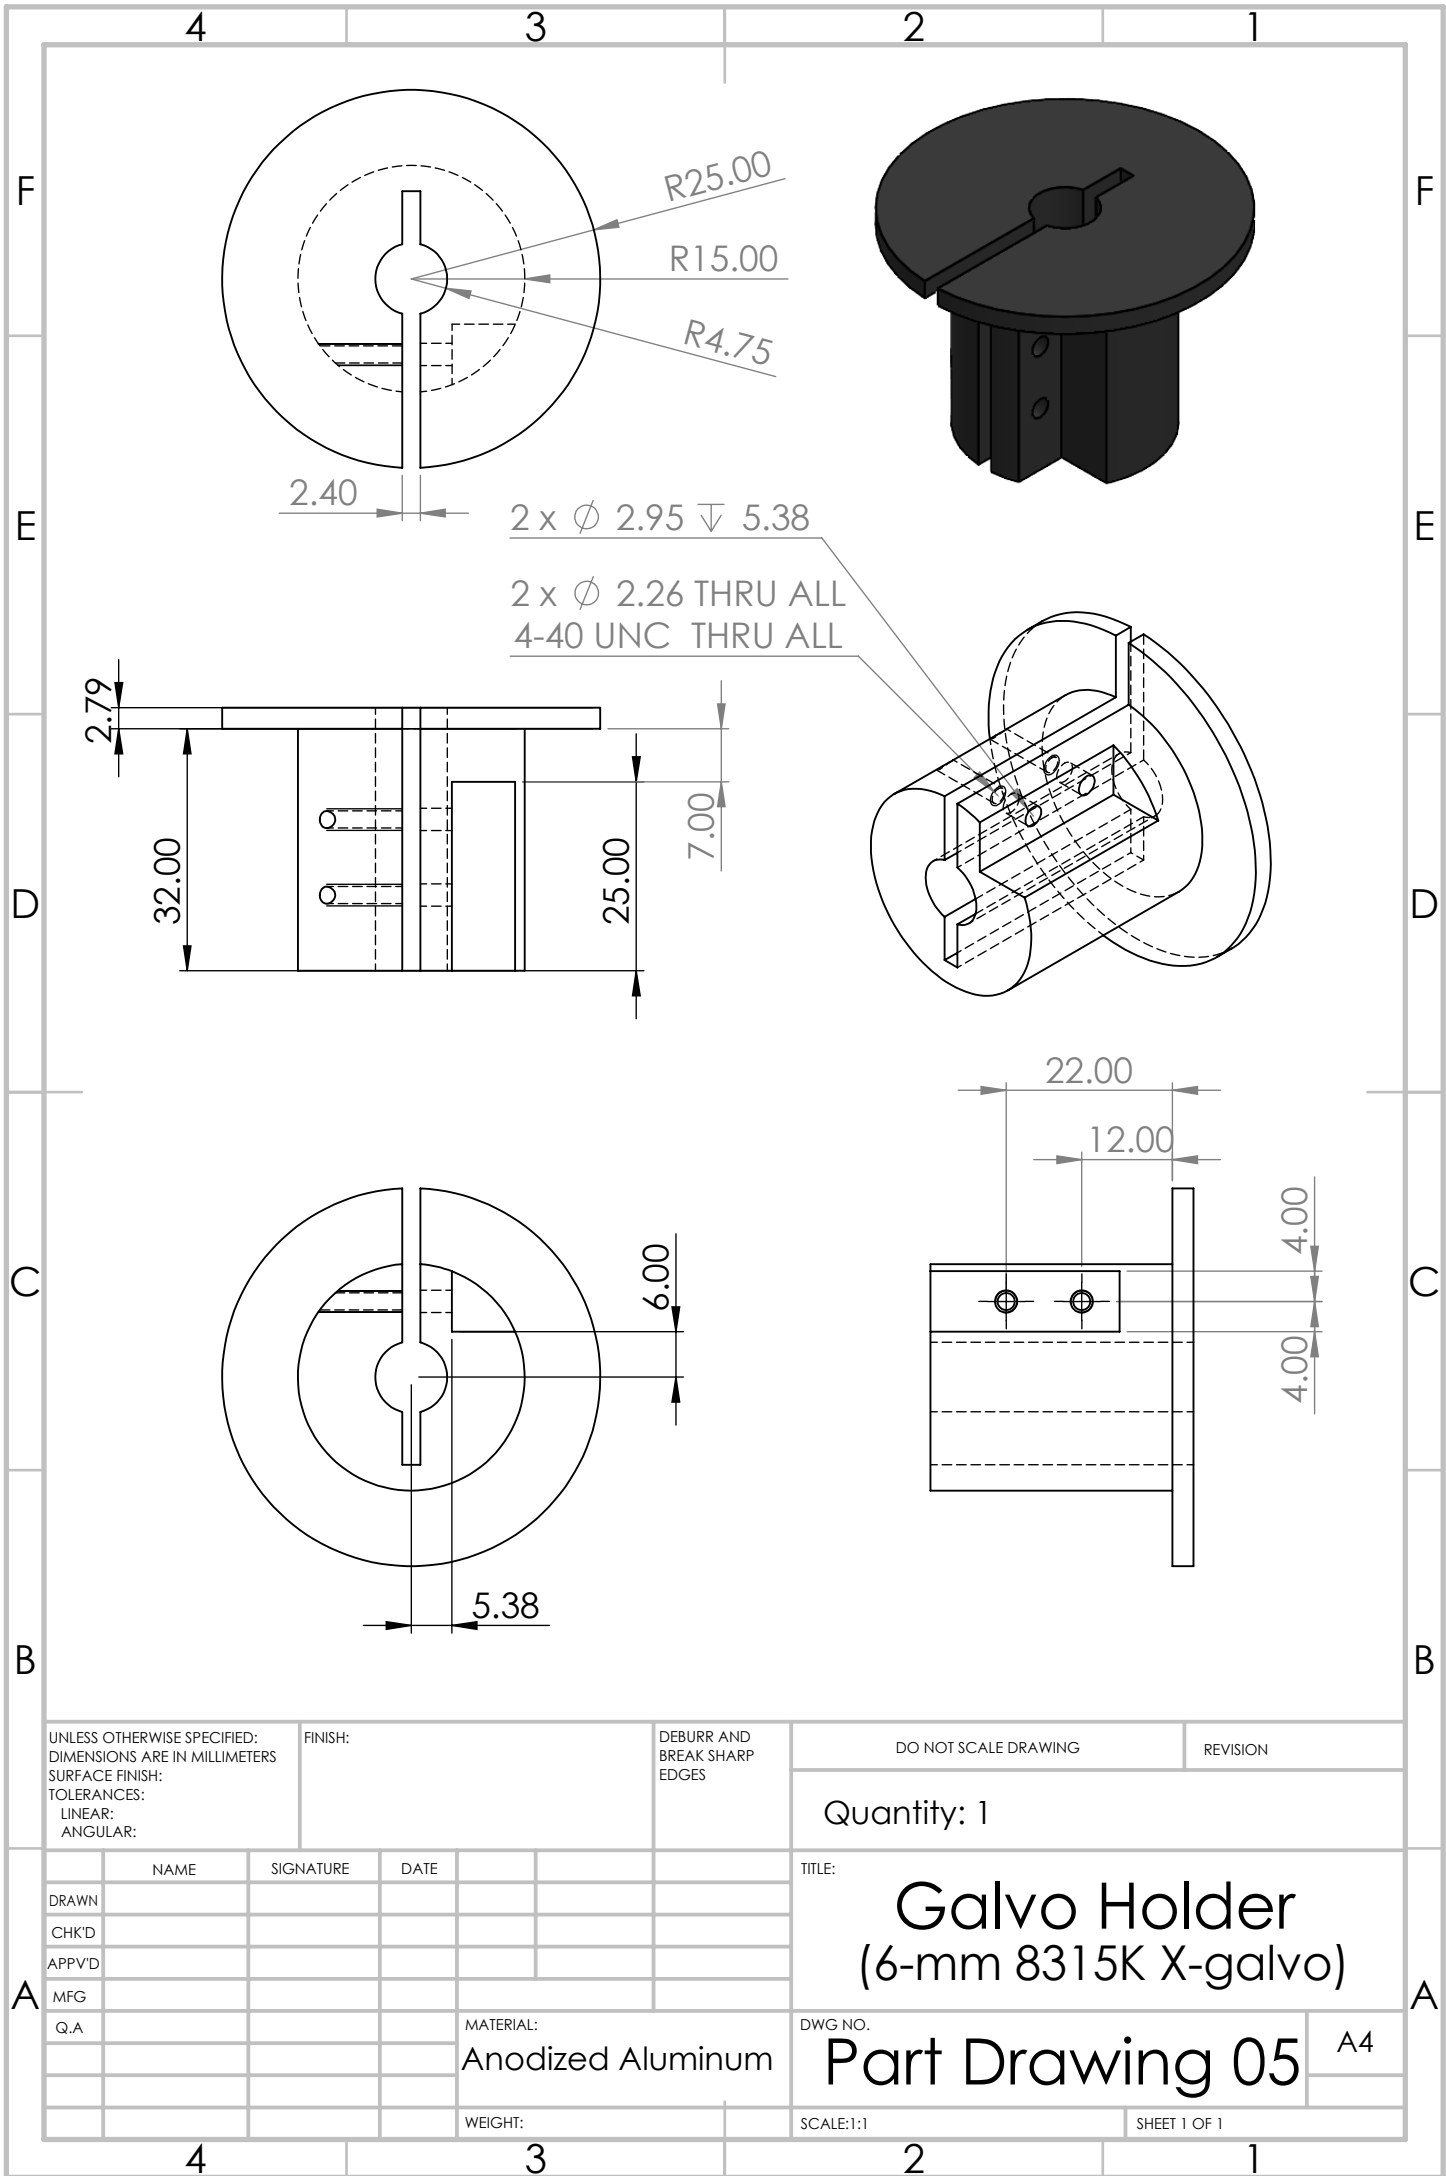

Supplement: MOESM2 [file 41596_2023_893_MOESM2_ESM.zip]

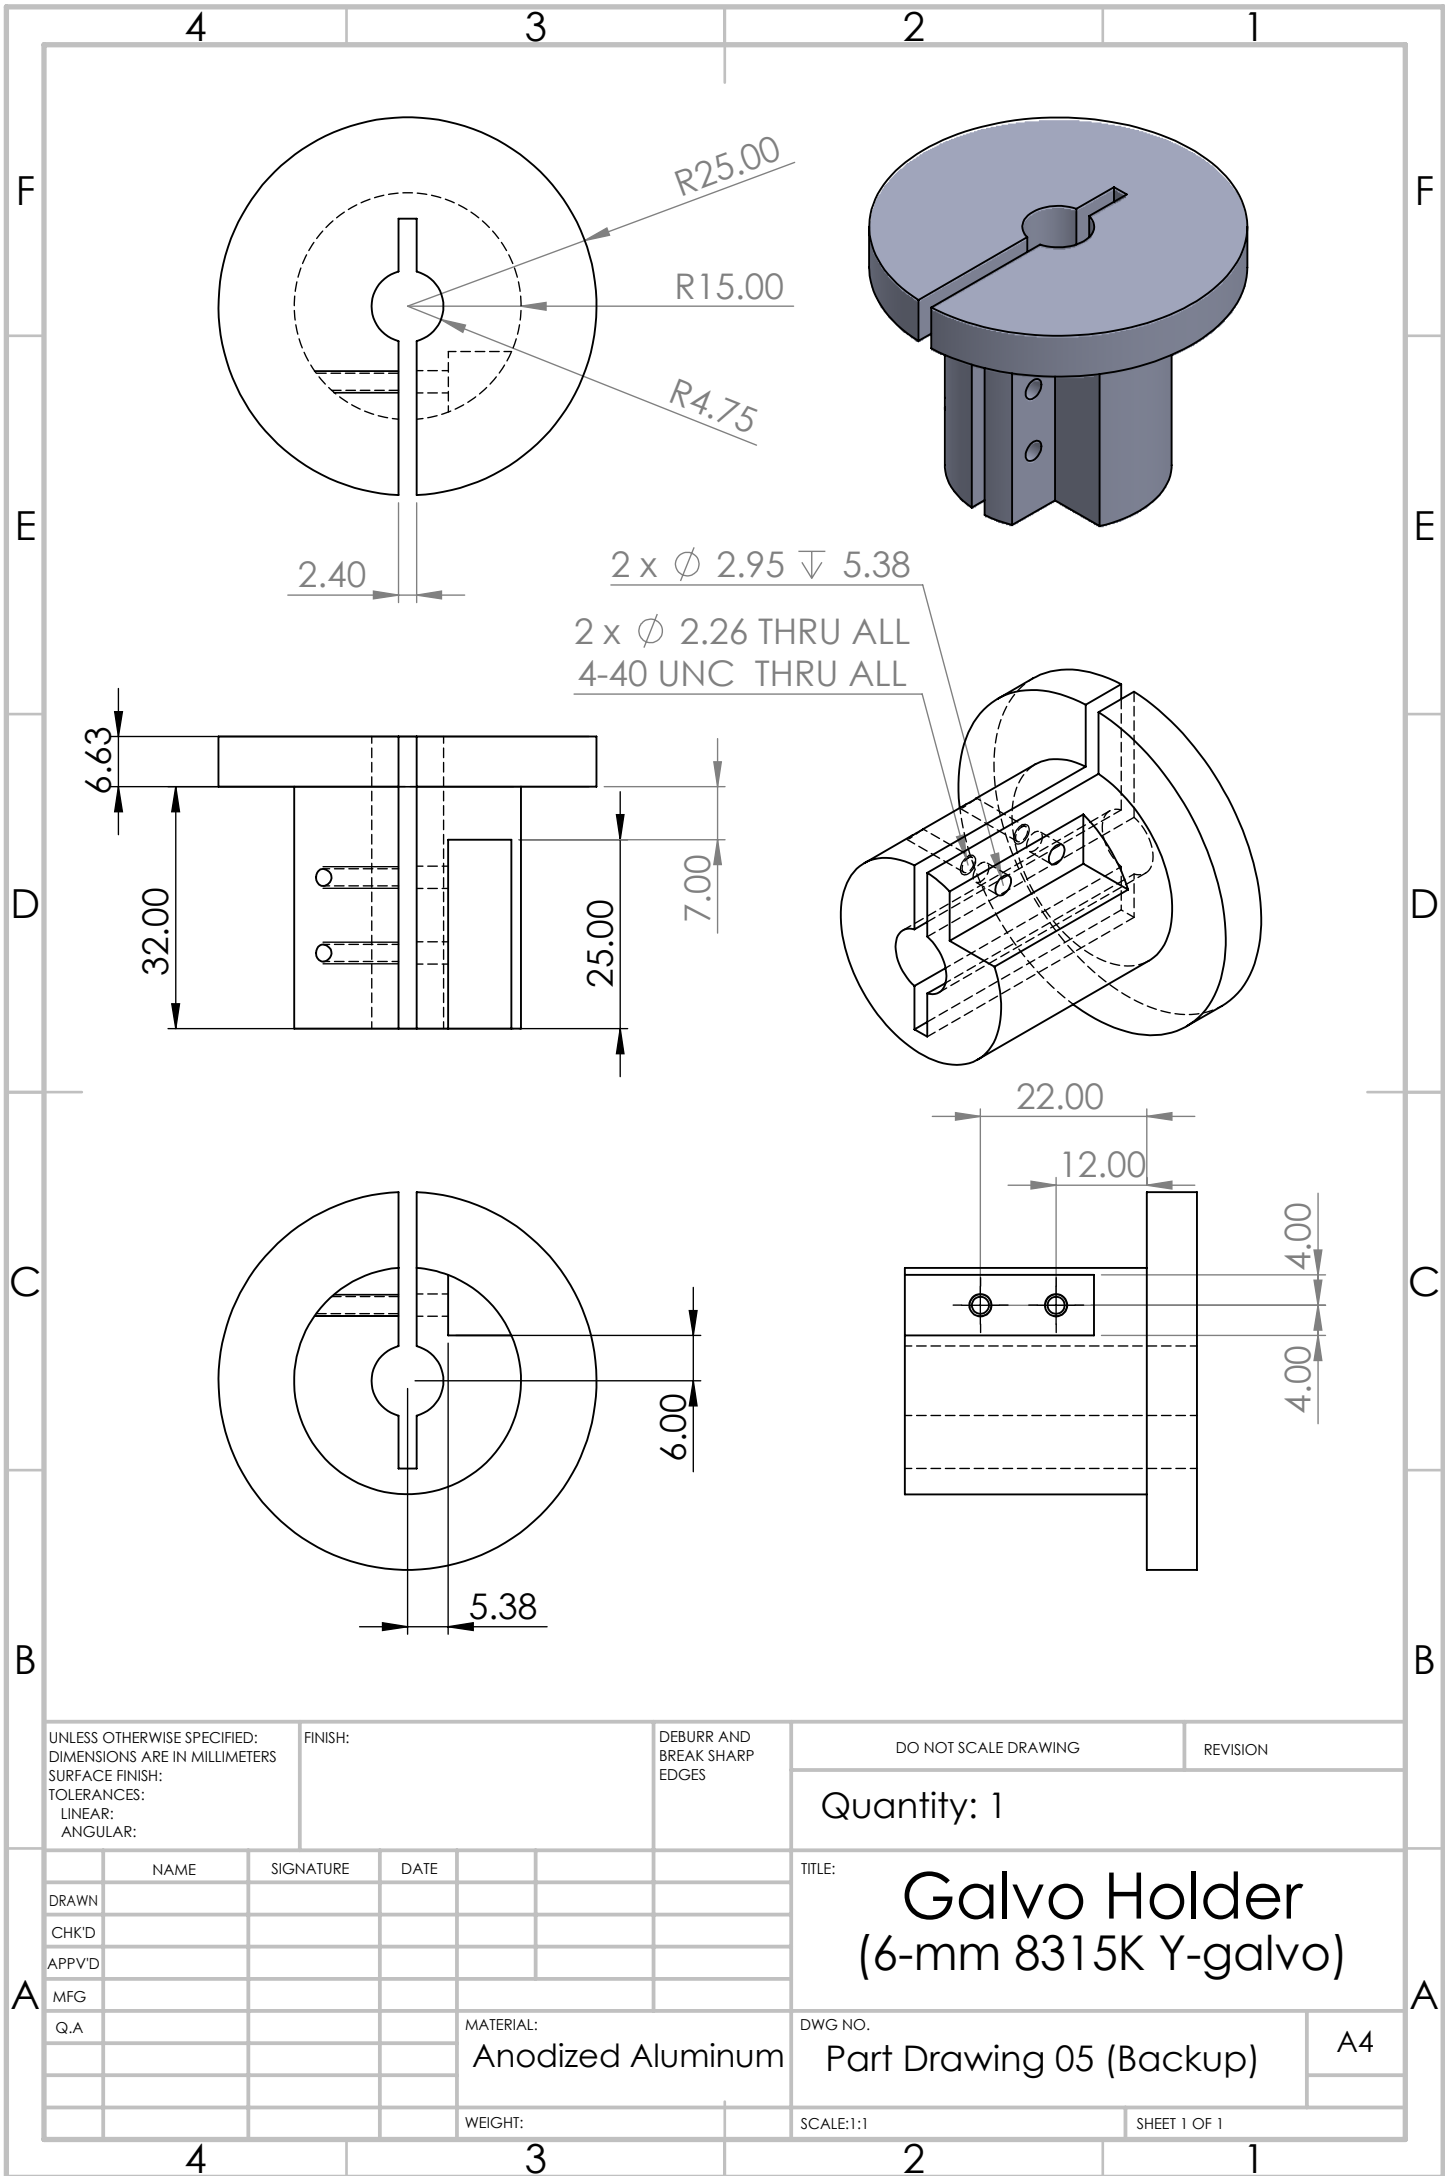

Supplement: MOESM2 [file 41596_2023_893_MOESM2_ESM.zip]
